# Supplementary material for: A prognostic neural epigenetic signature in high-grade glioma
Source: PubMed Central journal article supplement (PMC11186787; doi:10.1038/s41591-024-02969-w), 2024-05-17
Supplement: 41591_2024_2969_MOESM1_ESM.pdf [file 41591_2024_2969_MOESM1_ESM.pdf]

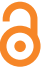

---

# A prognostic neural epigenetic signature in high-grade glioma

---

In the format provided by the authors and unedited

**Invasivity signature referring to Fig. 2a, modified from Venkataramani et al. (C**

| <b>Gene with CpG site</b> | <b>FDC in high-neural glioblastoma</b> | <b>p-value</b> |
|---------------------------|----------------------------------------|----------------|
| ACAT2 cg01552187          | -0.002831499                           | 0.505450424    |
| ACAT2 cg05879334          | -0.00716411                            | 0.240693002    |
| ACAT2 cg06131755          | 0.009578746                            | 0.878246513    |
| ACAT2 cg09900253          | -0.031348605                           | 0.047378021    |
| ACAT2 cg10268548          | -0.089339749                           | 0.000186993    |
| ACAT2 cg10432632          | -0.005114947                           | 0.327391606    |
| ACAT2 cg11366901          | -0.000844221                           | 0.890444426    |
| ACAT2 cg13804918          | -0.001767365                           | 0.655053412    |
| ACAT2 cg14767165          | -0.022957351                           | 0.017055807    |
| ACAT2 cg15298323          | 0.007980776                            | 0.892321385    |
| ACAT2 cg18959411          | 0.007946555                            | 0.434174425    |
| ACAT2 cg23829577          | -0.006605033                           | 0.272794245    |
| ACAT2 cg24224803          | -0.010696249                           | 0.089468298    |
| ACAT2 cg24683514          | -0.005742684                           | 0.563348584    |
| ACTB cg00804485           | -0.001459163                           | 0.758845435    |
| ACTB cg01741041           | -0.041150009                           | 0.110366757    |
| ACTB cg02356111           | 0.000586255                            | 0.83973706     |
| ACTB cg03324421           | 0.002539935                            | 0.24438669     |
| ACTB cg04490349           | 0.087479008                            | 3.76202E-09    |
| ACTB cg06003197           | 0.001098783                            | 0.84901267     |
| ACTB cg07476653           | 0.003021393                            | 0.790127206    |
| ACTB cg09041756           | -0.001080041                           | 0.913240466    |
| ACTB cg13677897           | -0.003932465                           | 0.20803228     |
| ACTB cg14145074           | -0.029789492                           | 0.211481959    |
| ACTB cg15356195           | 6.33335E-05                            | 0.98743804     |
| ACTB cg18080670           | 0.00221091                             | 0.597194605    |
| ACTB cg23162587           | 0.000156949                            | 0.983763106    |
| ACTB cg23175281           | -0.00231874                            | 0.240008907    |
| ACTB cg23261233           | -0.000951931                           | 0.826811142    |
| ANAPC11 cg00014986        | 0.00266718                             | 0.889811954    |
| ANAPC11 cg01515426        | -0.002872009                           | 0.381683056    |
| ANAPC11 cg02132003        | -0.002832782                           | 0.484925874    |
| ANAPC11 cg02387854        | -0.003452136                           | 0.490020313    |
| ANAPC11 cg05147328        | -0.005058256                           | 0.378086946    |
| ANAPC11 cg08184047        | -0.009016522                           | 0.071462883    |
| ANAPC11 cg08217660        | -0.000573827                           | 0.909824095    |
| ANAPC11 cg10468580        | -0.016037495                           | 0.355238891    |
| ANAPC11 cg12439463        | -0.003445827                           | 0.575885197    |
| ANAPC11 cg13780054        | -0.00144562                            | 0.747206976    |
| ANAPC11 cg14209926        | -0.003639239                           | 0.636761606    |
| ANAPC11 cg18375296        | -0.002544165                           | 0.574105223    |
| ANAPC11 cg21639988        | -0.002891732                           | 0.447969291    |
| ANAPC11 cg21823502        | 0.109799697                            | 0.007481461    |

|                    |              |             |
|--------------------|--------------|-------------|
| ANAPC11 cg23402661 | -0.00486093  | 0.430114732 |
| ANAPC11 cg23639857 | -0.002971663 | 0.646986047 |
| ANAPC11 cg25245636 | -0.002138617 | 0.611796194 |
| ANXA2 cg00155593   | -0.00208531  | 0.821163128 |
| ANXA2 cg00930615   | 0.015082206  | 0.661056585 |
| ANXA2 cg02072495   | 0.224340512  | 9.67929E-10 |
| ANXA2 cg03957109   | -0.03992108  | 0.088203536 |
| ANXA2 cg06738887   | 0.110049076  | 8.55297E-05 |
| ANXA2 cg08081036   | -0.004200192 | 0.228862944 |
| ANXA2 cg08163714   | -0.023696827 | 0.159257088 |
| ANXA2 cg09419486   | -0.000414986 | 0.972523294 |
| ANXA2 cg09533293   | 0.075811557  | 0.000125432 |
| ANXA2 cg11421255   | 0.003164667  | 0.927987565 |
| ANXA2 cg11681321   | 0.068389148  | 0.093502285 |
| ANXA2 cg13313836   | 0.112597111  | 4.6538E-08  |
| ANXA2 cg13634501   | 0.002205587  | 0.673941038 |
| ANXA2 cg13785221   | 0.00188554   | 0.66595642  |
| ANXA2 cg14397690   | 0.140771728  | 3.24978E-05 |
| ANXA2 cg16472060   | 0.00152041   | 0.761721887 |
| ANXA2 cg17893775   | 0.007862617  | 0.413031085 |
| ANXA2 cg20118643   | -0.010147926 | 0.791900126 |
| ANXA2 cg21711008   | 0.000756063  | 0.978783908 |
| ANXA2 cg22293140   | 0.013520142  | 0.40023998  |
| ANXA2 cg22365276   | 0.027893444  | 0.344574201 |
| ANXA2 cg22502206   | -0.001510245 | 0.971858078 |
| ANXA2 cg22581200   | -0.077056656 | 5.65177E-05 |
| ANXA2 cg25515997   | 0.040723081  | 0.013656094 |
| ANXA2 cg27554954   | 0.00049047   | 0.986226239 |
| AP2S1 cg00388479   | -0.00091617  | 0.829704065 |
| AP2S1 cg01358551   | -0.000887304 | 0.954871857 |
| AP2S1 cg02303361   | 0.000434366  | 0.893302566 |
| AP2S1 cg06591892   | 0.002876302  | 0.682851005 |
| AP2S1 cg07661340   | 0.000688833  | 0.967328744 |
| AP2S1 cg10672726   | -0.005841973 | 0.889713892 |
| AP2S1 cg12258824   | -0.005985545 | 0.902466201 |
| AP2S1 cg13321746   | 0.000185525  | 0.971562253 |
| AP2S1 cg14008648   | -0.00123259  | 0.71260334  |
| AP2S1 cg14815743   | -0.023997915 | 0.258047761 |
| AP2S1 cg23131950   | -0.065172502 | 0.105822528 |
| AP2S1 cg25230305   | -0.00153449  | 0.936936157 |
| ASCL1 cg00799539   | -0.033931824 | 0.184798231 |
| ASCL1 cg02246645   | -0.000571143 | 0.918922054 |
| ASCL1 cg03700449   | 0.001578118  | 0.850033386 |
| ASCL1 cg04610718   | -0.009202086 | 0.758023488 |
| ASCL1 cg08927739   | 0.000596862  | 0.964141374 |
| ASCL1 cg10672201   | -0.017506898 | 0.496274039 |
| ASCL1 cg10700564   | -0.010173686 | 0.001265123 |
| ASCL1 cg11228052   | -0.011447233 | 0.030017588 |
| ASCL1 cg14794428   | -0.002110542 | 0.579469321 |

|                  |              |             |
|------------------|--------------|-------------|
| ASCL1 cg16712637 | -0.000174087 | 0.974617716 |
| ASCL1 cg16921310 | -0.001664361 | 0.911411176 |
| ASCL1 cg17015844 | -0.002897518 | 0.634575379 |
| ASCL1 cg20053158 | -0.005436232 | 0.036172557 |
| ASCL1 cg22154024 | -0.000599841 | 0.90469773  |
| ASCL1 cg22356339 | -0.001177586 | 0.867203362 |
| ASCL1 cg25734490 | -0.003623736 | 0.32099803  |
| ASCL1 cg26866482 | -0.004199431 | 0.402155742 |
| ASCL1 cg27420520 | -0.000461612 | 0.895680955 |
| ASCL1 cg27569040 | -0.003413897 | 0.321736856 |
| ASPM cg03750742  | 0.007430442  | 0.477751994 |
| ASPM cg07346077  | 0.000823674  | 0.670799333 |
| ASPM cg10212558  | -0.00275131  | 0.411849926 |
| ASPM cg10519406  | 0.001695201  | 0.580698053 |
| ASPM cg11215015  | 0.011254807  | 0.705932117 |
| ASPM cg11336294  | -0.001427556 | 0.791214734 |
| ASPM cg12528753  | 0.001202956  | 0.829247505 |
| ASPM cg13073409  | -0.00903459  | 0.691091681 |
| ASPM cg13650137  | -0.001881355 | 0.737990322 |
| ASPM cg14212631  | -0.000375555 | 0.96622384  |
| ASPM cg16552589  | -0.001588784 | 0.810574327 |
| ASPM cg19350340  | -0.002003377 | 0.577600434 |
| ASPM cg24401645  | 0.002374414  | 0.702257808 |
| ATF3 cg01064286  | -0.034039613 | 0.327778743 |
| ATF3 cg01668452  | -0.00309132  | 0.909525172 |
| ATF3 cg02636234  | -0.006912706 | 0.305009067 |
| ATF3 cg03717803  | -0.004035877 | 0.182901128 |
| ATF3 cg04203508  | -0.02406342  | 0.002281661 |
| ATF3 cg05036120  | -0.04244999  | 0.007578291 |
| ATF3 cg07139026  | -0.012332452 | 0.494887946 |
| ATF3 cg07199812  | -0.001046542 | 0.830358469 |
| ATF3 cg10103631  | 0.000893211  | 0.820144908 |
| ATF3 cg10985914  | 0.193598595  | 1.50204E-12 |
| ATF3 cg13230348  | -0.002901235 | 0.549373491 |
| ATF3 cg13243329  | -0.000542458 | 0.862106421 |
| ATF3 cg15831613  | 0.00460767   | 0.887750663 |
| ATF3 cg17080534  | -0.003543549 | 0.6328169   |
| ATF3 cg18174834  | -0.001909547 | 0.80236872  |
| ATF3 cg18317154  | -0.034891993 | 0.34393291  |
| ATF3 cg18350796  | -0.007104866 | 0.170527033 |
| ATF3 cg19519612  | -0.005727051 | 0.321138193 |
| ATF3 cg20169506  | 0.004532186  | 0.166942409 |
| ATF3 cg21160472  | -0.001798761 | 0.949987815 |
| ATF3 cg21281234  | -0.001440779 | 0.893958421 |
| ATF3 cg21395152  | -0.011043032 | 0.720957877 |
| ATF3 cg23020752  | -0.01673109  | 0.18158993  |
| ATF3 cg23534142  | -0.089976141 | 0.002446341 |
| ATF3 cg24141233  | -0.003718048 | 0.745481824 |
| ATF3 cg24365042  | -0.0198477   | 0.314796813 |

|                     |              |             |
|---------------------|--------------|-------------|
| ATF3 cg25386151     | -0.022701073 | 0.060959597 |
| ATP1B3 cg03278965   | 0.002600497  | 0.78457982  |
| ATP1B3 cg09459719   | -0.000240604 | 0.976950092 |
| ATP1B3 cg16419706   | -0.005655744 | 0.166636508 |
| ATP1B3 cg17322125   | -0.001809844 | 0.776355298 |
| ATP1B3 cg19936194   | -0.001357228 | 0.756105907 |
| ATP1B3 cg24382918   | 0.020868795  | 0.673871027 |
| ATP1B3 cg25798112   | -0.001372827 | 0.634312168 |
| ATP1B3 cg26675219   | -0.000460252 | 0.942122289 |
| AURKA cg01596892    | 2.09981E-05  | 0.995997868 |
| AURKA cg03139435    | -0.01333975  | 0.726539535 |
| AURKA cg03776827    | -0.003688735 | 0.273084213 |
| AURKA cg04444873    | -0.000272118 | 0.943678171 |
| AURKA cg09712306    | 0.092536011  | 5.07025E-06 |
| AURKA cg14275127    | -0.00016175  | 0.979830123 |
| AURKA cg16417909    | -5.46997E-05 | 0.999270223 |
| AURKA cg19506755    | -0.002786216 | 0.544719828 |
| AURKA cg21763021    | 0.000217416  | 0.945676786 |
| AURKA cg21772838    | -0.002366921 | 0.562842209 |
| AURKA cg22732672    | 0.001720785  | 0.461672761 |
| AURKA cg22989919    | -0.006937198 | 0.128144473 |
| AURKA cg24941405    | -0.00010969  | 0.978004582 |
| AURKA cg27590859    | 0.002988862  | 0.688416333 |
| AURKAIP1 cg01508988 | -0.016561665 | 0.212157641 |
| AURKAIP1 cg02144516 | 0.037710508  | 0.032896944 |
| AURKAIP1 cg07395004 | -0.008913496 | 0.051778403 |
| AURKAIP1 cg09864992 | -0.020762107 | 0.086377297 |
| AURKAIP1 cg14094639 | -0.024157278 | 0.335534211 |
| AURKAIP1 cg15604233 | 0.001120446  | 0.809944267 |
| AURKAIP1 cg15617543 | -0.001494493 | 0.808393661 |
| AURKAIP1 cg19823490 | -0.004011708 | 0.514617333 |
| AURKAIP1 cg19871494 | -0.002392257 | 0.824616085 |
| AURKAIP1 cg26865478 | -0.006385359 | 0.868858348 |
| AURKB cg02245743    | 1.12354E-05  | 0.998561009 |
| AURKB cg04612488    | -0.000385516 | 0.963171378 |
| AURKB cg05617798    | -0.001466291 | 0.803373149 |
| AURKB cg05811247    | 0.006516426  | 0.24973696  |
| AURKB cg09132923    | -0.033560239 | 0.16860039  |
| AURKB cg11009596    | -0.004538066 | 0.317008878 |
| AURKB cg12844497    | 0.0023165    | 0.623899525 |
| AURKB cg13678641    | -0.002046883 | 0.744939924 |
| AURKB cg17365525    | -0.007139718 | 0.88347342  |
| AURKB cg18576335    | 0.00022577   | 0.988870795 |
| AURKB cg21724796    | 0.003123093  | 0.877003186 |
| AURKB cg26183021    | -0.007993486 | 0.893477997 |
| B2M cg00079638      | 0.001932268  | 0.623195515 |
| B2M cg00837838      | 0.001854189  | 0.362662841 |
| B2M cg03355298      | 0.001668684  | 0.608539775 |
| B2M cg07192821      | -0.001381446 | 0.792784039 |

|                  |              |             |
|------------------|--------------|-------------|
| B2M cg08188779   | 0.009093115  | 0.559468713 |
| B2M cg08350173   | -0.000789138 | 0.783886427 |
| B2M cg08459087   | 0.003430624  | 0.801950805 |
| B2M cg10081723   | -0.000137453 | 0.988162217 |
| B2M cg13964393   | 0.000583674  | 0.909506598 |
| B2M cg16039157   | -0.002802464 | 0.936083493 |
| B2M cg18555073   | 0.042105442  | 0.072126882 |
| B2M cg18696027   | 0.101002779  | 8.1121E-07  |
| B2M cg19404757   | 0.001014645  | 0.80418725  |
| B2M cg24134304   | 0.001233233  | 0.807828891 |
| BCAN cg00502190  | -0.036801637 | 0.384213156 |
| BCAN cg00765922  | 0.005678397  | 0.824293967 |
| BCAN cg02599463  | -0.007105952 | 0.155234255 |
| BCAN cg03265671  | -0.055764789 | 0.151522544 |
| BCAN cg04843111  | -0.028091214 | 0.217431451 |
| BCAN cg05654780  | -0.04636532  | 0.000265925 |
| BCAN cg05888917  | -0.003186367 | 0.391925727 |
| BCAN cg06929846  | 0.008301026  | 0.572282638 |
| BCAN cg08465120  | 0.037771765  | 0.044068883 |
| BCAN cg09182138  | -0.038213421 | 0.000376308 |
| BCAN cg10389771  | 0.054239684  | 0.095978295 |
| BCAN cg12664038  | -0.027479049 | 0.000236365 |
| BCAN cg13069892  | -0.147114626 | 6.62731E-07 |
| BCAN cg13950948  | 0.002384669  | 0.579920265 |
| BCAN cg14423692  | -0.017011542 | 0.000355178 |
| BCAN cg16269733  | 0.047392934  | 0.215310724 |
| BCAN cg19321979  | -0.065523117 | 6.34985E-06 |
| BCAN cg20270188  | -0.021938698 | 0.000958183 |
| BCAN cg21475402  | -0.018883071 | 0.003575384 |
| BCAN cg22168255  | 0.000806628  | 0.879151483 |
| BCAN cg23640929  | -0.161901586 | 1.64453E-08 |
| BCAN cg25773262  | 0.014217953  | 0.693344057 |
| BCL7C cg00283876 | -0.059453959 | 0.00086611  |
| BCL7C cg05386903 | -0.00341131  | 0.555859393 |
| BCL7C cg06815754 | -0.000275533 | 0.930841256 |
| BCL7C cg07013258 | -0.038799846 | 2.8512E-06  |
| BCL7C cg07378245 | -0.004275985 | 0.280367168 |
| BCL7C cg08297053 | -0.00367449  | 0.551663485 |
| BCL7C cg10337500 | 0.005257203  | 0.849316059 |
| BCL7C cg14290127 | -0.011167697 | 0.015412898 |
| BCL7C cg16657816 | -0.001133196 | 0.724606036 |
| BCL7C cg22377963 | -0.045993999 | 1.62563E-09 |
| BCL7C cg27420156 | -0.000963022 | 0.86965839  |
| BCL7C cg27609508 | -0.002678976 | 0.831249945 |
| BIRC5 cg00017271 | -0.187032038 | 5.00085E-12 |
| BIRC5 cg01886741 | -0.001229929 | 0.702959525 |
| BIRC5 cg04271999 | -0.008495785 | 0.475459899 |
| BIRC5 cg04972436 | -0.014032263 | 0.708069012 |
| BIRC5 cg07366188 | -0.189180367 | 1.03748E-09 |

|                  |              |             |
|------------------|--------------|-------------|
| BIRC5 cg10070788 | -0.176462371 | 4.72707E-08 |
| BIRC5 cg10140240 | -0.233278607 | 2.24539E-11 |
| BIRC5 cg11912239 | -0.143337454 | 1.15321E-09 |
| BIRC5 cg15270350 | -0.09189201  | 1.66352E-06 |
| BIRC5 cg17515702 | 0.002009715  | 0.812537951 |
| BIRC5 cg21070864 | -0.000206632 | 0.952561575 |
| BIRC5 cg23302638 | 0.00065527   | 0.938036224 |
| BIRC5 cg25986496 | -0.003947094 | 0.409387286 |
| BTG1 cg04100724  | -0.004581136 | 0.472570783 |
| BTG1 cg04211745  | -0.005322472 | 0.039345392 |
| BTG1 cg05819371  | -0.002454079 | 0.648585032 |
| BTG1 cg06551025  | -0.000787509 | 0.748407652 |
| BTG1 cg08832851  | -0.025503385 | 0.001205155 |
| BTG1 cg09918929  | -9.0996E-05  | 0.991321909 |
| BTG1 cg13132650  | -0.001311811 | 0.84695018  |
| BTG1 cg20078640  | -0.001635735 | 0.803172896 |
| BTG1 cg21381360  | -0.000869584 | 0.768582224 |
| BTG1 cg25218905  | -0.000539372 | 0.895492991 |
| BUB1 cg01114573  | -0.000159746 | 0.975970155 |
| BUB1 cg02066650  | 0.002815674  | 0.725534741 |
| BUB1 cg03208501  | -0.000834086 | 0.917817229 |
| BUB1 cg03292206  | -0.163991142 | 1.20094E-07 |
| BUB1 cg10416105  | -0.005121717 | 0.386628234 |
| BUB1 cg10954392  | 0.001158589  | 0.841761956 |
| BUB1 cg15054972  | -0.010631186 | 0.105874785 |
| BUB1 cg18518914  | -0.004724986 | 0.073729523 |
| BUB1 cg19177701  | -0.002493856 | 0.862971463 |
| BUB1 cg23198623  | 0.075723282  | 0.000328458 |
| BUB1 cg26628795  | 0.003595896  | 0.691383755 |
| BUB1 cg27210766  | 0.002609472  | 0.350898158 |
| BUD31 cg01115668 | -0.00430286  | 0.180949873 |
| BUD31 cg01916058 | 0.008629311  | 0.793079017 |
| BUD31 cg02798801 | -0.009012638 | 0.824158702 |
| BUD31 cg03695448 | -0.006770367 | 0.038386041 |
| BUD31 cg06688409 | -0.000565336 | 0.92265759  |
| BUD31 cg07477109 | -0.005433358 | 0.717917904 |
| BUD31 cg10213821 | 0.026100272  | 0.589027204 |
| BUD31 cg10883583 | -0.001950258 | 0.729803144 |
| BUD31 cg11724156 | -0.01413671  | 0.371619142 |
| BUD31 cg16327497 | 0.001600512  | 0.48997761  |
| BUD31 cg16415856 | -0.005493672 | 0.166912971 |
| BUD31 cg17841065 | -0.001247119 | 0.901358542 |
| BUD31 cg18634506 | 0.021735791  | 0.676573656 |
| BUD31 cg21786957 | -0.000806531 | 0.893616942 |
| BUD31 cg24990989 | 0.025619106  | 0.443277074 |
| BUD31 cg25782445 | 0.004515991  | 0.597348804 |
| BUD31 cg26259610 | -0.000252011 | 0.951384331 |
| BUD31 cg27334224 | -0.00482764  | 0.620798182 |
| CALM1 cg01267274 | -0.000695873 | 0.935601686 |

|                     |              |             |
|---------------------|--------------|-------------|
| CALM1 cg01311654    | -0.001315656 | 0.714066416 |
| CALM1 cg01579928    | -0.000221768 | 0.956306075 |
| CALM1 cg02272150    | 4.37004E-05  | 0.992395135 |
| CALM1 cg03062665    | -0.001388568 | 0.758957804 |
| CALM1 cg04712435    | -0.003555592 | 0.55847342  |
| CALM1 cg05077358    | 0.011720093  | 0.681312739 |
| CALM1 cg07150772    | -0.001804042 | 0.784374439 |
| CALM1 cg13481335    | -0.00178996  | 0.845175869 |
| CALM1 cg15930145    | 0.000312375  | 0.972664814 |
| CALM1 cg18079499    | -0.022943043 | 0.226180299 |
| CALM1 cg18087520    | -0.023640879 | 0.542893792 |
| CALM1 cg18858717    | -0.000526416 | 0.858960568 |
| CALM1 cg20250935    | -0.029632997 | 0.310736742 |
| CALM1 cg20328328    | -0.001224332 | 0.704619971 |
| CALM1 cg21086878    | -0.00251461  | 0.642898922 |
| CALM1 cg22979624    | -0.002486538 | 0.514194757 |
| CALM1 cg23047920    | 0.001909871  | 0.812541948 |
| CALM1 cg26007849    | -0.008107753 | 0.726238939 |
| CALM2 cg01600782    | 0.000219461  | 0.94670453  |
| CALM2 cg03034696    | -0.052316211 | 0.001790935 |
| CALM2 cg03545677    | -0.000860665 | 0.800281722 |
| CALM2 cg09707038    | -0.005622422 | 0.636059722 |
| CALM2 cg09920725    | -0.00312972  | 0.382889433 |
| CALM2 cg09942741    | -0.00134336  | 0.85388394  |
| CALM2 cg10805483    | -0.001096913 | 0.943861676 |
| CALM2 cg12478290    | -0.005393099 | 0.390939118 |
| CALM2 cg16653203    | 0.001901345  | 0.529628867 |
| CALM2 cg19536127    | -0.005928252 | 0.276044685 |
| CALM2 cg20203588    | 0.00116555   | 0.694591052 |
| CALM2 cg21029591    | -0.002437496 | 0.59298336  |
| CALM2 cg21361646    | -0.04664686  | 0.042179615 |
| CALM2 cg24431318    | -0.002143733 | 0.849193615 |
| CALM2 cg27073431    | 0.083297289  | 4.66123E-07 |
| CASC5 cg00091781    | 0.000187723  | 0.966864471 |
| CASC5 cg00235645    | 0.004517041  | 0.305692886 |
| CASC5 cg00437399    | -0.00955118  | 0.518432261 |
| CASC5 cg03355190    | -0.000643753 | 0.882143281 |
| CASC5 cg03605064    | 0.002844202  | 0.665801888 |
| CASC5 cg07106138    | -0.006109381 | 0.385411479 |
| CASC5 cg09861958    | 0.001660087  | 0.443112781 |
| CASC5 cg16228087    | 0.003682282  | 0.55106199  |
| CASC5 cg17355835    | 0.001788358  | 0.657317605 |
| CASC5 cg18582520    | -0.01590234  | 0.463652341 |
| CASC5 cg20314325    | -0.001395136 | 0.643932297 |
| CASC5 cg26431595    | 0.003127339  | 0.238168993 |
| CASC5 cg27279253    | 0.002587316  | 0.569897087 |
| CASC5 cg27659014    | -0.001588786 | 0.830163607 |
| CCDC109B cg00131899 | 0.001758478  | 0.867168869 |
| CCDC109B cg01442334 | -0.001596369 | 0.845005295 |



|                     |              |              |
|---------------------|--------------|--------------|
| CCDC109B cg02105485 | 0.002132852  | 0.520069103  |
| CCDC109B cg03005261 | -0.005760034 | 0.9111116751 |
| CCDC109B cg03591709 | 0.002946165  | 0.436370613  |
| CCDC109B cg05248542 | -0.03546057  | 0.294736095  |
| CCDC109B cg05702851 | 0.000792846  | 0.973923576  |
| CCDC109B cg11498516 | -0.028361399 | 0.054372687  |
| CCDC109B cg12309813 | -0.099518824 | 9.17465E-06  |
| CCDC109B cg15209369 | -0.038190669 | 0.004101989  |
| CCDC109B cg17756860 | -0.003860647 | 0.875075139  |
| CCDC109B cg19563331 | 0.001061186  | 0.847487875  |
| CCDC109B cg19905837 | -0.00176011  | 0.639965425  |
| CCDC109B cg20886165 | 0.002306499  | 0.313083472  |
| CCDC109B cg21837443 | -0.002727376 | 0.494374549  |
| CCDC109B cg23196549 | -0.006130182 | 0.924511812  |
| CCNA2 cg01854459    | -0.001940648 | 0.562080374  |
| CCNA2 cg04314790    | -0.000130614 | 0.964813226  |
| CCNA2 cg04512424    | -0.000432452 | 0.840577477  |
| CCNA2 cg06762614    | 0.000439212  | 0.947654408  |
| CCNA2 cg06817840    | 0.004287098  | 0.536914474  |
| CCNA2 cg06952910    | -6.36731E-05 | 0.998133953  |
| CCNA2 cg07263562    | -0.069436543 | 0.015802112  |
| CCNA2 cg07806866    | -0.004343079 | 0.422423614  |
| CCNA2 cg08201690    | 0.008110224  | 0.023163366  |
| CCNA2 cg10002561    | -0.000126944 | 0.977111926  |
| CCNA2 cg18913527    | 0.000533602  | 0.911961804  |
| CCNA2 cg20391652    | -0.002640221 | 0.302271054  |
| CCNA2 cg20573242    | -0.001382348 | 0.663173641  |
| CCNA2 cg20844771    | 0.007154474  | 0.004489953  |
| CCNA2 cg22219489    | 0.00121264   | 0.683917157  |
| CDCA3 cg07446572    | -0.029263248 | 0.541291025  |
| CDCA3 cg15942562    | -0.035514438 | 0.189858636  |
| CDCA3 cg25700897    | -0.0351497   | 0.033348792  |
| CDK1 cg02401235     | -0.002209296 | 0.621599974  |
| CDK1 cg04271103     | -0.000840246 | 0.821889406  |
| CDK1 cg06793798     | 0.007552926  | 0.298068606  |
| CDK1 cg13227473     | -0.002948953 | 0.344706131  |
| CDK1 cg13554667     | 0.003142808  | 0.937699877  |
| CDK1 cg13954297     | -0.001009655 | 0.832630293  |
| CDK1 cg14922279     | -0.002845693 | 0.413190639  |
| CDK1 cg15172601     | -0.001529221 | 0.777991034  |
| CDK1 cg17778722     | -0.012445571 | 0.461489417  |
| CDK1 cg19147990     | -0.006088753 | 0.349908696  |
| CDK1 cg23973115     | -0.08564302  | 0.005218867  |
| CDK1 cg25228510     | 0.004965375  | 0.666341999  |
| CDK1 cg25793692     | 0.001311933  | 0.750384659  |
| CDK1 cg27457323     | 0.00109583   | 0.719035684  |
| CDKN3 cg00649500    | 0.004510196  | 0.758840429  |
| CDKN3 cg01209943    | -0.006483145 | 0.313708164  |
| CDKN3 cg02252340    | -0.002486405 | 0.811795739  |

|                  |              |             |
|------------------|--------------|-------------|
| CDKN3 cg02626977 | -0.001164194 | 0.853507652 |
| CDKN3 cg03724882 | -0.007570922 | 0.686359486 |
| CDKN3 cg04276794 | -0.003260051 | 0.266176693 |
| CDKN3 cg04290510 | 0.00298384   | 0.92154878  |
| CDKN3 cg09988663 | -0.012267925 | 0.406118779 |
| CDKN3 cg14144732 | -0.000403876 | 0.9907812   |
| CDKN3 cg18471460 | -0.007721527 | 0.422582785 |
| CDKN3 cg20454620 | 0.000266227  | 0.958793092 |
| CDKN3 cg20908785 | 6.72765E-06  | 0.999707344 |
| CDKN3 cg24032252 | -0.086493838 | 0.003333275 |
| CENPA cg03666973 | -0.000575384 | 0.913877161 |
| CENPA cg03798852 | 0.00051619   | 0.85657277  |
| CENPA cg04749129 | -0.008006116 | 0.346611987 |
| CENPA cg10315993 | -0.018097205 | 0.361417163 |
| CENPA cg10480329 | 0.075644983  | 2.41185E-07 |
| CENPA cg13874838 | -0.001469933 | 0.679173855 |
| CENPA cg14934766 | -0.000434288 | 0.965743508 |
| CENPA cg17206978 | -0.002998205 | 0.491171596 |
| CENPA cg21023052 | -0.002356454 | 0.321495518 |
| CENPA cg21360828 | -0.016545181 | 0.283063412 |
| CENPA cg21450708 | -0.003755671 | 0.873827344 |
| CENPA cg22284448 | -0.089226851 | 1.29101E-05 |
| CENPA cg24127278 | -0.003787636 | 0.924959563 |
| CENPA cg25942688 | -0.004709093 | 0.834915209 |
| CENPA cg27025088 | 0.006075325  | 0.509785815 |
| CENPF cg00620223 | -0.004172996 | 0.630536326 |
| CENPF cg00987890 | -0.008875708 | 0.219634084 |
| CENPF cg03327327 | -0.004160962 | 0.829071983 |
| CENPF cg04552378 | 0.004174947  | 0.651297823 |
| CENPF cg05794695 | -0.006014144 | 0.628149069 |
| CENPF cg07140595 | -0.001549201 | 0.762408726 |
| CENPF cg09065776 | -0.000979926 | 0.837716415 |
| CENPF cg09885951 | -0.000676597 | 0.847451783 |
| CENPF cg09933323 | -0.041115668 | 0.339019839 |
| CENPF cg10379951 | 0.001336187  | 0.879306213 |
| CENPF cg10716356 | -0.056562588 | 0.025558782 |
| CENPF cg13085338 | -0.000102508 | 0.976195779 |
| CENPF cg15009294 | 0.003318137  | 0.713097821 |
| CENPF cg15639974 | -0.004187568 | 0.154437946 |
| CENPF cg15722631 | -0.003923954 | 0.928123876 |
| CENPF cg16327647 | -0.008848892 | 0.079081132 |
| CENPF cg17750334 | -0.00340171  | 0.263599326 |
| CENPF cg21164723 | 0.001197216  | 0.805388452 |
| CENPF cg21693965 | -0.07269509  | 0.001116707 |
| CENPF cg22041712 | -0.022961457 | 0.523844611 |
| CENPF cg22426789 | 0.003303881  | 0.78864363  |
| CENPF cg25284075 | -0.00339202  | 0.62198421  |
| CENPK cg00984787 | -0.026364623 | 0.183253162 |
| CENPK cg01403114 | -0.005707332 | 0.349882379 |

|                   |              |             |
|-------------------|--------------|-------------|
| CENPK cg11044823  | 0.002492271  | 0.781099262 |
| CENPK cg11190754  | -0.005123065 | 0.516862967 |
| CENPK cg13034654  | -0.001669994 | 0.76335961  |
| CENPK cg18192574  | 0.013779211  | 0.379623094 |
| CENPK cg18503711  | -0.003185444 | 0.665295543 |
| CENPK cg22719655  | -0.03826576  | 0.022795648 |
| CENPK cg23818046  | -0.000165106 | 0.977905396 |
| CFL1 cg02715140   | 0.001575586  | 0.52569798  |
| CFL1 cg06443583   | -0.003482482 | 0.70115056  |
| CFL1 cg08425745   | 0.000361314  | 0.958774086 |
| CFL1 cg10983586   | -0.001527633 | 0.788447433 |
| CFL1 cg11042866   | -0.002367286 | 0.620890149 |
| CFL1 cg12815271   | -0.002014708 | 0.688916374 |
| CFL1 cg12849795   | 0.001053426  | 0.954571253 |
| CFL1 cg14395634   | 0.00260213   | 0.556430449 |
| CFL1 cg16985113   | 0.000564378  | 0.893477997 |
| CFL1 cg20909159   | -0.013858314 | 0.268079388 |
| CFL1 cg22068741   | -0.001061424 | 0.897858347 |
| CFL1 cg22548788   | -0.002803802 | 0.514088784 |
| CHCHD3 cg14187409 | -0.004542561 | 0.464870011 |
| CHCHD3 cg14577835 | -0.002411049 | 0.85569339  |
| CHCHD3 cg14936778 | -0.008185482 | 0.258918583 |
| CHCHD3 cg17755880 | -0.041168747 | 0.368661106 |
| CHCHD3 cg19717492 | -0.002458532 | 0.631110849 |
| CHCHD3 cg21096502 | -0.001663137 | 0.708008142 |
| CHCHD3 cg21424664 | 0.008671581  | 0.822364756 |
| CHCHD3 cg22383121 | -0.061988192 | 0.061914369 |
| CHCHD3 cg25408620 | -0.00184937  | 0.918480977 |
| CHCHD3 cg25529965 | 0.000326419  | 0.908771777 |
| CHCHD3 cg26399411 | 0.000432359  | 0.98189765  |
| CHCHD3 cg00032852 | -0.004106989 | 0.490471057 |
| CHCHD3 cg00446758 | -0.019393126 | 0.016164099 |
| CHCHD3 cg02204578 | -0.009412725 | 0.165181429 |
| CHCHD3 cg07486100 | -0.002201529 | 0.739457996 |
| CHCHD3 cg07590705 | 0.003848267  | 0.676508416 |
| CHCHD3 cg08734988 | -0.005628442 | 0.17850301  |
| CHCHD3 cg08757624 | -0.087067957 | 0.000164477 |
| CHCHD3 cg10488050 | -0.185736864 | 7.55381E-06 |
| CHCHD3 cg10590628 | 0.000279641  | 0.960820363 |
| CHCHD3 cg11369172 |              |             |
| CHCHD3 cg13476800 |              |             |
| CHCHD3 cg14583365 |              |             |
| CHCHD3 cg15373257 |              |             |
| CHCHD3 cg16770546 |              |             |
| CHCHD3 cg18047684 |              |             |
| CHCHD3 cg18987274 |              |             |
| CHCHD3 cg19632026 |              |             |
| CHCHD3 cg19918623 |              |             |
| CHCHD3 cg21025171 |              |             |

|                  |              |             |
|------------------|--------------|-------------|
| CKAP2 cg04566791 | -0.003242882 | 0.411727209 |
| CKAP2 cg07533350 | 5.53274E-05  | 0.993827156 |
| CKAP2 cg07898084 | -0.000403755 | 0.903490441 |
| CKAP2 cg08997021 | -0.006817182 | 0.647351173 |
| CKAP2 cg10218426 | -0.00206039  | 0.601141956 |
| CKAP2 cg10728060 | -0.001110465 | 0.713423644 |
| CKAP2 cg12988843 | 0.000572708  | 0.907815483 |
| CKAP2 cg14221264 | -0.005856031 | 0.298744377 |
| CKAP2 cg14425257 | 0.001391134  | 0.720872751 |
| CKAP2 cg23721425 | 0.005126426  | 0.760651861 |
| CKAP2 cg24469095 | 0.00373579   | 0.457658877 |
| CKAP2 cg26660792 | 0.004859863  | 0.815564239 |
| CKS1B cg00993057 | 0.000462471  | 0.888469097 |
| CKS1B cg08733086 | 0.001777867  | 0.855239529 |
| CKS1B cg22234827 | 6.68566E-05  | 0.989350221 |
| CKS1B cg25017976 | 0.004437111  | 0.80420494  |
| CLIC1 cg00140361 | -0.003830735 | 0.808637481 |
| CLIC1 cg00579105 | 0.030750133  | 0.000586669 |
| CLIC1 cg00657529 | 0.003445269  | 0.727163376 |
| CLIC1 cg01578324 | 0.07358951   | 4.45878E-05 |
| CLIC1 cg03619586 | 0.041096954  | 0.205145743 |
| CLIC1 cg04658027 | 0.049056913  | 0.000848063 |
| CLIC1 cg07404514 | -0.002949316 | 0.906071712 |
| CLIC1 cg08254733 | 0.003624144  | 0.913671321 |
| CLIC1 cg09887589 | 0.073192288  | 0.000145946 |
| CLIC1 cg10041232 | 0.062479183  | 0.026043297 |
| CLIC1 cg11093373 | 0.02346178   | 0.010133036 |
| CLIC1 cg12506597 | -0.055452969 | 0.145956048 |
| CLIC1 cg12921375 | 0.024134064  | 0.007038077 |
| CLIC1 cg13026137 | 0.04385248   | 0.09600182  |
| CLIC1 cg13622821 | 0.003648985  | 0.800906885 |
| CLIC1 cg14138132 | 0.035301748  | 0.000394286 |
| CLIC1 cg16587838 | 0.095557592  | 4.3594E-09  |
| CLIC1 cg17069739 | 0.004769811  | 0.209953846 |
| CLIC1 cg18402034 | -0.049831245 | 0.001236629 |
| CLIC1 cg18909389 | -0.030083729 | 0.029371872 |
| CLIC1 cg20165831 | 0.001451052  | 0.955039151 |
| CLIC1 cg21769117 | 0.096053734  | 8.22189E-08 |
| CLIC1 cg23065732 | 0.013683752  | 0.684327758 |
| CLIC1 cg23425079 | 0.104093933  | 4.17176E-06 |
| CLIC1 cg24208375 | 0.022955578  | 0.012839109 |
| CLIC1 cg25588725 | 0.005119702  | 0.516174019 |
| CLU cg00359590   | 0.033250079  | 0.235559942 |
| CLU cg00928580   | 0.020242317  | 0.277210517 |
| CLU cg01572979   | 0.00093443   | 0.935649591 |
| CLU cg01916918   | -0.149953515 | 3.5944E-05  |
| CLU cg02393097   | 0.011431811  | 0.370593291 |
| CLU cg03735511   | 0.007452927  | 0.501003464 |
| CLU cg04929736   | -0.002439873 | 0.397780605 |

|                  |              |             |
|------------------|--------------|-------------|
| CLU cg05499834   | 0.002530216  | 0.778261083 |
| CLU cg08594681   | -0.012565466 | 0.189537298 |
| CLU cg09969545   | 0.000272484  | 0.984668411 |
| CLU cg11467637   | -0.004387885 | 0.417051635 |
| CLU cg11694223   | 0.007437013  | 0.250636086 |
| CLU cg11697169   | -0.008013828 | 0.716015435 |
| CLU cg11775417   | 0.000479684  | 0.928653555 |
| CLU cg11783834   | 0.033200697  | 0.041383857 |
| CLU cg12729838   | -0.02413152  | 0.001927641 |
| CLU cg13159325   | -0.006454016 | 0.049832853 |
| CLU cg13488078   | 0.001792646  | 0.932796603 |
| CLU cg13620439   | 0.016141698  | 0.501418099 |
| CLU cg14917244   | -0.01160151  | 0.029960287 |
| CLU cg16292768   | -0.005361694 | 0.925314577 |
| CLU cg19442470   | -0.059537587 | 0.001474272 |
| CLU cg19549068   | -0.0022148   | 0.46855968  |
| CLU cg20504077   | -0.002531829 | 0.544983309 |
| CLU cg21739400   | -0.004107392 | 0.318251173 |
| CLU cg22313574   | -0.011490708 | 0.227251219 |
| CLU cg22738440   | -0.00196452  | 0.850256912 |
| CLU cg23460950   | -0.012631208 | 0.010125412 |
| CLU cg23548686   | -0.000249802 | 0.961963188 |
| CLU cg24030037   | 0.001350604  | 0.879956043 |
| CLU cg24257038   | -3.93907E-05 | 0.99480484  |
| CLU cg25302704   | 0.083002398  | 0.031288845 |
| CNN3 cg01045913  | -0.004207233 | 0.871399802 |
| CNN3 cg02718725  | -0.002692806 | 0.534283321 |
| CNN3 cg02835561  | -0.01248736  | 0.228960724 |
| CNN3 cg07823585  | -0.002272331 | 0.758660811 |
| CNN3 cg08940075  | 0.078059725  | 0.02109977  |
| CNN3 cg10992558  | -0.001508422 | 0.958294357 |
| CNN3 cg12448539  | -0.001435521 | 0.824781793 |
| CNN3 cg12613632  | 0.067913271  | 0.045076862 |
| CNN3 cg14669167  | -0.00180227  | 0.400931434 |
| CNN3 cg15496336  | 0.002874746  | 0.63437294  |
| CNN3 cg18158385  | -0.00227013  | 0.462262165 |
| CNN3 cg18344652  | -0.003530476 | 0.458935156 |
| CNN3 cg19164761  | -0.053991084 | 0.02552851  |
| CNN3 cg22045340  | -0.000331496 | 0.980397555 |
| CNN3 cg22333836  | 0.000435608  | 0.920870198 |
| CNN3 cg24663131  | -0.00172209  | 0.774163707 |
| CNN3 cg24731597  | 0.003767388  | 0.606653592 |
| CNN3 cg25026898  | -0.002388106 | 0.489479467 |
| CNN3 cg25311623  | -0.009064094 | 0.803126331 |
| CNN3 cg26227186  | -0.003088935 | 0.826906982 |
| CNN3 cg26619317  | -0.009312699 | 0.051677238 |
| CNN3 cg27231335  | -0.009939415 | 0.031029232 |
| COX5A cg00023695 | 0.001257023  | 0.770347674 |
| COX5A cg00926162 | -0.001851672 | 0.424649879 |

|                    |              |             |
|--------------------|--------------|-------------|
| COX5A cg01737828   | -0.000770534 | 0.855376061 |
| COX5A cg02035565   | -0.010634435 | 0.54012426  |
| COX5A cg04249030   | -0.000701807 | 0.888497596 |
| COX5A cg10147044   | -0.002922398 | 0.265522327 |
| COX5A cg12478809   | 0.008287118  | 0.679601518 |
| COX5A cg17397401   | 0.005060134  | 0.799335929 |
| COX5A cg18817426   | 0.006935792  | 0.756171038 |
| COX5A cg25250073   | 0.001785506  | 0.867154181 |
| COX5A cg27140083   | 0.0029907    | 0.572611062 |
| COX8A cg01818597   | 0.001576381  | 0.835987633 |
| COX8A cg04674081   | -0.001525845 | 0.781168543 |
| COX8A cg04912466   | -0.001722893 | 0.858990893 |
| COX8A cg07104773   | -0.001901963 | 0.798052749 |
| COX8A cg08063013   | -0.002632607 | 0.363298528 |
| COX8A cg10297721   | -0.001727325 | 0.685644633 |
| COX8A cg11338389   | -0.000934067 | 0.946858655 |
| COX8A cg14265380   | 0.007201477  | 0.215104768 |
| COX8A cg17292384   | -0.041393981 | 0.335664708 |
| COX8A cg19806933   | -0.003200579 | 0.556245856 |
| CRYAB cg00514609   | -0.014939946 | 0.396813121 |
| CRYAB cg07476508   | -0.020822881 | 0.267102633 |
| CRYAB cg10048349   | -0.022051823 | 0.119013795 |
| CRYAB cg11694519   | 0.010626994  | 0.890864964 |
| CRYAB cg13084335   | -0.051080941 | 5.68069E-11 |
| CRYAB cg15204861   | -0.039439725 | 0.036386626 |
| CRYAB cg15545878   | -0.068419573 | 1.26903E-10 |
| CTNNAL1 cg02446003 | 0.002056743  | 0.759122518 |
| CTNNAL1 cg05485060 | -0.010454263 | 0.745477813 |
| CTNNAL1 cg13546538 | 0.030721427  | 0.055766366 |
| CTNNAL1 cg13813623 | 0.000485933  | 0.921239617 |
| CTNNAL1 cg13832679 | -0.003754211 | 0.788629745 |
| CTNNAL1 cg14442329 | 0.002522639  | 0.816862357 |
| CTNNAL1 cg14452121 | -0.003654388 | 0.772760406 |
| CTNNAL1 cg14487878 | 0.001763616  | 0.826721398 |
| CTNNAL1 cg15459742 | -0.001637881 | 0.609549172 |
| CTNNAL1 cg16969852 | 0.000376358  | 0.955039151 |
| CYR61 cg03519711   | -0.000240188 | 0.948862332 |
| CYR61 cg04453065   | -0.001039972 | 0.73304293  |
| CYR61 cg05395648   | -0.005575831 | 0.146540675 |
| CYR61 cg06805280   | -0.00260201  | 0.449365155 |
| CYR61 cg07165167   | 0.039446616  | 0.240253594 |
| CYR61 cg07350718   | 0.006814025  | 0.148992064 |
| CYR61 cg07561554   | -0.003946883 | 0.379310209 |
| CYR61 cg07602008   | 0.002999416  | 0.522183111 |
| CYR61 cg11750851   | -0.044497145 | 5.11121E-06 |
| CYR61 cg12278705   | 0.056973006  | 0.068737979 |
| CYR61 cg13206932   | 0.038025676  | 0.264015784 |
| CYR61 cg13871826   | 0.033082771  | 0.118370283 |
| CYR61 cg13984515   | -0.007323461 | 0.108096961 |

|                   |              |             |
|-------------------|--------------|-------------|
| CYR61 cg15648041  | -0.022038744 | 0.402776109 |
| CYR61 cg17319576  | 0.000723376  | 0.916112446 |
| CYR61 cg17499345  | 0.002735007  | 0.856043541 |
| CYR61 cg18027683  | -0.010345151 | 0.716750366 |
| CYR61 cg20293609  | 0.005906931  | 0.098443456 |
| CYR61 cg22123915  | 0.067221598  | 0.038529436 |
| CYR61 cg23785940  | -0.011306138 | 0.00374251  |
| CYR61 cg24692177  | -0.014361496 | 0.000449873 |
| CYR61 cg25720697  | -0.007683498 | 0.043498578 |
| DCX cg02103689    | -0.001321987 | 0.727131267 |
| DCX cg02404933    | 0.000157614  | 0.989861035 |
| DCX cg04563643    | 0.001636739  | 0.821806811 |
| DCX cg06247470    | -0.003337333 | 0.322392363 |
| DCX cg07073120    | -0.008461055 | 0.067368741 |
| DCX cg07847925    | -0.00847862  | 0.227078372 |
| DCX cg08897132    | -0.002789872 | 0.634203996 |
| DCX cg10636821    | 0.000391797  | 0.980212152 |
| DCX cg10723012    | -0.001672196 | 0.697567018 |
| DCX cg18605491    | -0.006456236 | 0.147584596 |
| DCX cg20757526    | -0.004626411 | 0.477037058 |
| DCX cg27226927    | 0.009034649  | 0.627919867 |
| DLGAP5 cg05225373 | 0.001974951  | 0.528267924 |
| DLGAP5 cg13517138 | -0.007389513 | 0.449050006 |
| DLGAP5 cg18941521 | 0.003519395  | 0.848511705 |
| DLGAP5 cg23678254 | 0.106206615  | 1.76646E-06 |
| DLGAP5 cg24733298 | 4.17522E-07  | 0.999954443 |
| DLGAP5 cg25465634 | -0.008467208 | 0.760656778 |
| DLL1 cg00084338   | -0.055315739 | 0.000306747 |
| DLL1 cg00356645   | -0.083590435 | 0.000593904 |
| DLL1 cg00474209   | -0.007857178 | 0.042193709 |
| DLL1 cg00494883   | -0.00208333  | 0.585133332 |
| DLL1 cg00839434   | -0.001672186 | 0.594182097 |
| DLL1 cg01475503   | -0.029226764 | 0.042955073 |
| DLL1 cg03228386   | -0.012431819 | 0.109533665 |
| DLL1 cg03394401   | -0.014875096 | 0.191318998 |
| DLL1 cg03815571   | -0.000724061 | 0.911370493 |
| DLL1 cg05228964   | -0.116324988 | 2.04475E-05 |
| DLL1 cg06432036   | -0.093610772 | 1.3931E-05  |
| DLL1 cg07598357   | -0.142436695 | 7.88266E-08 |
| DLL1 cg11519760   | -0.150196506 | 2.24526E-05 |
| DLL1 cg12024311   | 0.001053224  | 0.78733835  |
| DLL1 cg12581730   | -0.001836559 | 0.709865818 |
| DLL1 cg13250324   | -0.024861675 | 0.107643824 |
| DLL1 cg13356429   | -0.00076345  | 0.441556626 |
| DLL1 cg13494348   | -0.153697794 | 1.48092E-08 |
| DLL1 cg14347219   | -0.083670742 | 0.012228654 |
| DLL1 cg14497851   | -0.002878121 | 0.510805878 |
| DLL1 cg15319528   | -0.020425059 | 0.005452615 |
| DLL1 cg15931921   | -0.14946891  | 3.19889E-05 |

|                   |              |             |
|-------------------|--------------|-------------|
| DLL1 cg17586256   | -0.021900582 | 0.375983458 |
| DLL1 cg18239372   | -0.000273936 | 0.958462904 |
| DLL1 cg19189355   | -0.039750077 | 0.004405671 |
| DLL1 cg19524023   | -0.066085373 | 0.000176931 |
| DLL1 cg20926049   | -0.048795236 | 5.23715E-05 |
| DLL1 cg21293831   | -0.007903556 | 0.508988229 |
| DLL1 cg23191576   | -0.126110219 | 7.14366E-06 |
| DLL1 cg25372103   | -0.011326131 | 0.027445897 |
| DLL1 cg25389470   | -0.001608667 | 0.845222499 |
| DLL1 cg27139933   | 0.000905265  | 0.973559078 |
| DLL1 cg27246129   | -0.046344863 | 0.000794148 |
| DLL1 cg27614489   | -0.017241586 | 0.000502965 |
| DLL3 cg00323695   | -0.010532301 | 0.006837553 |
| DLL3 cg01519877   | -0.008119107 | 0.153792765 |
| DLL3 cg01590848   | 0.032627074  | 0.355532982 |
| DLL3 cg02873868   | -0.001187727 | 0.900205348 |
| DLL3 cg03139057   | -0.002262632 | 0.355205842 |
| DLL3 cg03807316   | 0.05067645   | 0.093483062 |
| DLL3 cg06664357   | -0.067727006 | 0.172168312 |
| DLL3 cg07640648   | 0.008426755  | 0.896613615 |
| DLL3 cg08145231   | -0.004167737 | 0.564031872 |
| DLL3 cg08551532   | 0.052291894  | 0.091177291 |
| DLL3 cg09431525   | -0.090999224 | 0.004412646 |
| DLL3 cg10832304   | 0.027376896  | 0.545283501 |
| DLL3 cg11680792   | -0.006488676 | 0.464354238 |
| DLL3 cg14925296   | -0.045989653 | 7.25579E-05 |
| DLL3 cg15132673   | 0.039156755  | 0.30517816  |
| DLL3 cg15412721   | -0.028572604 | 0.112016609 |
| DLL3 cg17945053   | -0.075738456 | 0.011890315 |
| DLL3 cg19183842   | -0.088175248 | 0.017369597 |
| DLL3 cg21718857   | -0.001953511 | 0.644450827 |
| DLL3 cg22174088   | -0.001097337 | 0.846632062 |
| DLL3 cg25425784   | -0.013781633 | 0.086414319 |
| DLL3 cg25627144   | -0.000692664 | 0.952711947 |
| DLL3 cg26536750   | -0.02050824  | 0.114745995 |
| DLL3 cg26801047   | -0.00430351  | 0.5709431   |
| DNJAB1 cg00395795 | -0.005828637 | 0.262118203 |
| DNJAB1 cg01083584 | 0.013268709  | 0.275809396 |
| DNJAB1 cg05514743 | -0.008040106 | 0.082007964 |
| DNJAB1 cg07813370 | 0.000492107  | 0.991986778 |
| DNJAB1 cg13682437 | -0.003535917 | 0.447759659 |
| DNJAB1 cg15712267 | -0.03785041  | 0.063860453 |
| DNJAB1 cg19799760 | -0.002248503 | 0.661594642 |
| DNJAB1 cg23889338 | -0.001018328 | 0.821325446 |
| DNJAB1 cg24714147 | -0.001887004 | 0.770331176 |
| DTYMK cg00130180  | -0.068516474 | 0.053617592 |
| DTYMK cg00590500  | -0.005327764 | 0.665359838 |
| DTYMK cg00969323  | -0.067430299 | 0.086471283 |
| DTYMK cg02823437  | -0.05159954  | 0.014848218 |



|                   |              |             |
|-------------------|--------------|-------------|
| DTYMK cg03301433  | -0.014651644 | 0.177120983 |
| DTYMK cg05880944  | -0.061725836 | 0.000308354 |
| DTYMK cg06974460  | -0.012281463 | 0.54778289  |
| DTYMK cg08081485  | -0.122186881 | 0.000465466 |
| DTYMK cg10460130  | -0.011868196 | 0.193100522 |
| DTYMK cg10888811  | -0.052741922 | 0.004640697 |
| DTYMK cg11383961  | -0.001554461 | 0.919999023 |
| DTYMK cg12508009  | 0.002573678  | 0.705903674 |
| DTYMK cg12570942  | -0.008613527 | 0.335380673 |
| DTYMK cg13800586  | -0.006688261 | 0.192687018 |
| DTYMK cg15720975  | -0.004140348 | 0.442158057 |
| DTYMK cg15734942  | -0.105864399 | 0.000320384 |
| DTYMK cg16760712  | -0.051382752 | 7.24636E-05 |
| DTYMK cg18361031  | -0.003260284 | 0.363419705 |
| DTYMK cg19024381  | -0.001947253 | 0.716335136 |
| DTYMK cg19288752  | -0.00223162  | 0.71648875  |
| DTYMK cg19463885  | -0.005848506 | 0.045082978 |
| DTYMK cg19935506  | -0.003787231 | 0.356917298 |
| DTYMK cg21478921  | -0.018837404 | 0.034719392 |
| DTYMK cg23232749  | -0.006312962 | 0.52759517  |
| DTYMK cg24414737  | -0.06479337  | 0.003364133 |
| EEF1B2 cg04202957 | -0.059486898 | 4.38615E-07 |
| EEF1B2 cg10188403 | 0.002583104  | 0.47150003  |
| EEF1B2 cg12608507 | 0.00216781   | 0.97319508  |
| EEF1B2 cg12907060 | -0.000708528 | 0.793349301 |
| EEF1B2 cg13582873 | 0.000491075  | 0.947954769 |
| EEF1B2            | -0.036375439 | 0.198105881 |
| EEF1B2 cg19638845 | -0.001949904 | 0.882257685 |
| EEF1B2 cg19656890 | 0.001433259  | 0.532404098 |
| EEF1B2 cg21166785 | -0.002210466 | 0.618923695 |
| EEF1B2 cg21660531 | 0.005338796  | 0.342502798 |
| EEF1B2 cg22929018 | 0.001012623  | 0.787116402 |
| EEF1B2 cg24330485 | -0.000375098 | 0.908852917 |
| EEF1B2 cg25099438 | 0.003717752  | 0.585181349 |
| EEF1B2 cg27248887 | -0.002153583 | 0.971070416 |
| ETFB cg02666184   | -0.000555493 | 0.917055423 |
| ETFB cg02837212   | -0.001264048 | 0.795500792 |
| ETFB cg04322978   | -0.003795408 | 0.490749144 |
| ETFB cg08854169   | 0.000512435  | 0.880815031 |
| ETFB cg10219093   | -0.000622621 | 0.876682878 |
| ETFB cg19497071   | -0.004182085 | 0.560249714 |
| ETFB cg22469897   | -0.111169833 | 0.003087162 |
| ETFB cg23851027   | -0.057108515 | 0.010986303 |
| ETFB cg24129914   | -0.000495367 | 0.960643182 |
| ETV1 cg00328593   | -0.000186681 | 0.97319508  |
| ETV1 cg00469341   | -0.000256168 | 0.981860643 |
| ETV1 cg01958221   | -0.002007777 | 0.743844567 |
| ETV1 cg02881625   | -0.000736166 | 0.848698853 |
| ETV1 cg02971555   | -0.008163061 | 0.303742437 |

|                   |              |             |
|-------------------|--------------|-------------|
| ETV1 cg03844154   | 0.000769735  | 0.85765241  |
| ETV1 cg03932308   | 0.001145038  | 0.89139471  |
| ETV1 cg03985360   | -0.067347711 | 0.004122318 |
| ETV1 cg05131488   | -0.081766792 | 0.001008789 |
| ETV1 cg05605257   | 0.000215916  | 0.959168289 |
| ETV1 cg05918135   | -0.000713145 | 0.840325261 |
| ETV1 cg06154860   | 0.000262994  | 0.943909624 |
| ETV1 cg06735111   | -0.001646017 | 0.602857783 |
| ETV1 cg07323919   | -0.001655701 | 0.746022268 |
| ETV1 cg09366357   | -0.000334487 | 0.935519067 |
| ETV1 cg10386045   | -0.000981049 | 0.845456894 |
| ETV1 cg11104510   | -0.001798822 | 0.572090543 |
| ETV1 cg11279021   | -0.003832914 | 0.083754315 |
| ETV1 cg11897145   | -0.000997321 | 0.86951059  |
| ETV1 cg13524180   | 0.001296075  | 0.756523437 |
| ETV1 cg15256387   | -0.10261305  | 8.64858E-05 |
| ETV1 cg17548881   | -0.002427377 | 0.403932365 |
| ETV1 cg20500248   | -0.011340701 | 0.413688695 |
| ETV1 cg21249126   | 0.001214395  | 0.8145458   |
| ETV1 cg21463790   | -0.059475018 | 4.06577E-06 |
| ETV1 cg22479366   | -0.002667036 | 0.527878606 |
| ETV1 cg22748443   | 0.003260617  | 0.587911155 |
| ETV1 cg26796083   | -0.079011934 | 0.000795993 |
| ETV1 cg26986937   | -0.000106157 | 0.984259404 |
| FAM64A cg03736603 | -0.000680501 | 0.910411426 |
| FAM64A cg11001581 | -0.036307858 | 3.503E-05   |
| FAM64A cg11090139 | 0.000174017  | 0.98809046  |
| FAM64A cg14606680 | 0.001657037  | 0.838196868 |
| FAM64A cg15847614 | -0.001238884 | 0.940770327 |
| FAM64A cg16057782 | -0.000162792 | 0.985722116 |
| FAM64A cg20124188 | -0.026445655 | 2.31753E-06 |
| FAM64A cg20479311 | -0.000351278 | 0.966835308 |
| FAM64A cg23465990 | -0.00264339  | 0.764271178 |
| FAM64A cg23545250 | -0.045431135 | 0.001002585 |
| FAM64A cg25288085 | 0.005736512  | 0.765088426 |
| FAM64A cg27248073 | -0.002941926 | 0.894262906 |
| FAM64A cg27469199 | -0.004549467 | 0.371199122 |
| FAM83D cg02301527 | 0.01729291   | 0.468924419 |
| FAM83D cg04071118 | -0.005117044 | 0.794109021 |
| FAM83D cg06163215 | -0.000337593 | 0.981795361 |
| FAM83D cg10751856 | 0.001049967  | 0.9768091   |
| FAM83D cg13849422 | 0.035196219  | 0.368602655 |
| FAM83D cg14647299 | 0.002215096  | 0.795100499 |
| FAM83D cg15195292 | 0.025855371  | 0.418053467 |
| FAM83D cg16808310 | -0.005681148 | 0.817246701 |
| FAM83D cg20241801 | 0.028874761  | 0.259302569 |
| FAM83D cg21361343 | 0.031807624  | 0.257130143 |
| FAM83D cg24314026 | 0.004846139  | 0.834201164 |
| FAM83D cg25782652 | -0.025146478 | 0.212285932 |

|                   |              |             |
|-------------------|--------------|-------------|
| FAM83D cg26220336 | 0.005431884  | 0.925896518 |
| FAM83D cg26351764 | 0.041528496  | 0.150851674 |
| FAM83D cg27660920 | 0.018090274  | 0.420276906 |
| FBXO5 cg00220769  | 0.011050545  | 0.064967759 |
| FBXO5 cg01547733  | -0.002496636 | 0.416943357 |
| FBXO5 cg02426093  | 0.000596147  | 0.927876855 |
| FBXO5 cg06131526  | 0.000100533  | 0.986820353 |
| FBXO5 cg06434997  | 0.001109483  | 0.82952256  |
| FBXO5 cg08463929  | -0.015089554 | 0.03556839  |
| FBXO5 cg10367364  | 0.000523203  | 0.882729939 |
| FBXO5 cg11370748  | 0.083865325  | 0.015952516 |
| FBXO5 cg12290002  | -0.000742885 | 0.819608382 |
| FBXO5 cg12551462  | -0.002683186 | 0.445597869 |
| FBXO5 cg14765172  | -0.004589125 | 0.611101476 |
| FBXO5 cg16493566  | -0.001378053 | 0.676604408 |
| FBXO5 cg17828223  | 0.000394377  | 0.895309217 |
| FBXO5 cg18198306  | -0.031868002 | 0.01628221  |
| FBXO5 cg19384905  | -0.035878236 | 0.030403967 |
| FBXO5 cg20219159  | -0.001125348 | 0.673508846 |
| FBXO5 cg22417733  | -0.022750961 | 0.004210284 |
| FBXO5 cg23777444  | -0.00177085  | 0.69427938  |
| FBXO5 cg25401754  | -0.000698711 | 0.877157529 |
| FBXO5 cg25833238  | 0.003215993  | 0.424786787 |
| FBXO5 cg25960313  | -0.002576296 | 0.304858762 |
| FBXO5 cg26425730  | 0.000259539  | 0.957560719 |
| FDPS cg00034416   | -0.000264501 | 0.968710305 |
| FDPS cg03933784   | 0.000268035  | 0.946071405 |
| FDPS cg05954884   | -0.000306148 | 0.949074385 |
| FDPS cg06979924   | -0.153910813 | 1.26415E-05 |
| FDPS cg08847296   | 0.00138828   | 0.631848676 |
| FDPS cg10836036   | 0.00158978   | 0.573292901 |
| FDPS cg12489819   | -0.002652564 | 0.680088492 |
| FDPS cg14026927   | 0.000539293  | 0.897432113 |
| FDPS cg14788660   | -0.001520835 | 0.790481847 |
| FDPS cg15470750   | -0.002459542 | 0.325197429 |
| FDPS cg17142371   | -9.59392E-05 | 0.976431014 |
| FDPS cg21787190   | 7.52389E-05  | 0.993837913 |
| FDPS cg23022783   | -0.002217135 | 0.870008743 |
| FDPS cg26316072   | -0.005635863 | 0.814481486 |
| FDPS cg26420739   | -0.000337539 | 0.956587473 |
| FIBP cg07796475   | -0.005502141 | 0.132320729 |
| FIBP cg14387684   | -0.003522021 | 0.299817728 |
| FIBP cg20853702   | -0.014038105 | 0.020148403 |
| FIBP cg25601275   | 0.000961952  | 0.899110776 |
| FIBP cg26453990   | -0.003514413 | 0.41255775  |
| GAPDH cg00241355  | -0.005642716 | 0.222522096 |
| GAPDH cg00252813  | -0.001797085 | 0.689098679 |
| GAPDH cg02519286  | -0.005340433 | 0.0915911   |
| GAPDH cg03400107  | -0.002381305 | 0.550607948 |

|                  |              |             |
|------------------|--------------|-------------|
| GAPDH cg06362313 | -0.032898551 | 8.49138E-06 |
| GAPDH cg09193981 | -0.002654731 | 0.66294362  |
| GAPDH cg09644986 | -0.002855649 | 0.790483024 |
| GAPDH cg15350627 | -0.002661036 | 0.403087862 |
| GAPDH cg15869694 | -8.24408E-05 | 0.989048075 |
| GAPDH cg18689930 | -0.001610085 | 0.614172441 |
| GAPDH cg20917484 | 0.002457748  | 0.515925462 |
| GAPDH cg21225563 | -0.055975866 | 0.006639772 |
| GFAP cg02407342  | 0.043916242  | 0.171211376 |
| GFAP cg03383006  | -0.118937607 | 2.79891E-10 |
| GFAP cg07918341  | -0.104760699 | 1.71307E-10 |
| GFAP cg08156531  | -0.065185141 | 0.003382258 |
| GFAP cg08358624  | -0.101332325 | 7.18451E-09 |
| GFAP cg09038914  | -0.092405815 | 5.79661E-08 |
| GFAP cg09639715  | -0.099070165 | 1.71968E-08 |
| GFAP cg16343401  | 0.048175227  | 0.187900858 |
| GFAP cg17265120  | 0.01318091   | 0.748387717 |
| GFAP cg18208742  | -0.068687857 | 9.0615E-06  |
| GFAP cg20668546  | -0.00293973  | 0.934104483 |
| GFAP cg20911989  | 0.033899145  | 0.246909684 |
| GFAP cg21601845  | -0.111519787 | 2.74492E-08 |
| GFAP cg21944455  | -0.107208073 | 5.2574E-11  |
| GFAP cg22100937  | -0.047360613 | 0.040550469 |
| GFAP cg23016243  | -0.008605407 | 0.791895602 |
| GFAP cg23242944  | -0.104212486 | 2.16261E-10 |
| GFAP cg24797574  | 0.020160713  | 0.638181327 |
| GNB2 cg01399255  | -0.002955808 | 0.556149733 |
| GNB2 cg02557189  | -0.008368182 | 0.100160978 |
| GNB2 cg02620388  | -0.000317198 | 0.947438699 |
| GNB2 cg03550794  | -0.00234537  | 0.475567576 |
| GNB2 cg04803128  | -0.00105959  | 0.810760361 |
| GNB2 cg07056567  | -0.009748859 | 0.050552131 |
| GNB2 cg07982057  | -0.003240737 | 0.50678621  |
| GNB2 cg08310216  | -0.00189012  | 0.482852083 |
| GNB2 cg11223864  | -0.000680752 | 0.864180192 |
| GNB2 cg14298577  | -0.001311952 | 0.838764235 |
| GNB2 cg16177440  | -0.009290287 | 0.836999501 |
| GNB2 cg16359985  | -0.027437869 | 0.199558125 |
| GNB2 cg16560679  | 0.002729741  | 0.944973881 |
| GNB2 cg16684939  | -0.002256324 | 0.484960271 |
| GNB2 cg17702518  | -0.00163832  | 0.591066555 |
| GNB2 cg17854981  | -0.024384419 | 0.136812834 |
| GNB2 cg22377237  | -0.001967273 | 0.823205027 |
| GNB2 cg23325230  | -0.0043992   | 0.196827133 |
| GNB2 cg25392362  | -0.000230325 | 0.966746787 |
| GNB2 cg25963822  | 0.00770088   | 0.752044477 |
| GNB2 cg26621408  | -0.036296131 | 0.044861244 |
| GNB2 cg27369641  | -0.056603005 | 0.036871722 |
| GPX4 cg00502555  | -0.001011757 | 0.849271485 |

|                  |              |             |
|------------------|--------------|-------------|
| GPX4 cg01588546  | -0.001363358 | 0.694132868 |
| GPX4 cg01613691  | -0.06520202  | 0.000180995 |
| GPX4 cg04903600  | 0.009291455  | 0.799166245 |
| GPX4 cg04928147  | -0.001008036 | 0.900758415 |
| GPX4 cg10732871  | 0.095426158  | 1.08395E-05 |
| GPX4 cg13612480  | 0.000575276  | 0.872848515 |
| GPX4 cg14682345  | 0.001525135  | 0.749875502 |
| GPX4 cg14894245  | 0.022841725  | 0.134181639 |
| GPX4 cg16715692  | -0.00204026  | 0.754334858 |
| GPX4 cg17812013  | -0.004904168 | 0.214763165 |
| GPX4 cg18061485  | 0.003214102  | 0.58579494  |
| GPX4 cg18506744  | 0.064995032  | 1.68961E-08 |
| GPX4 cg19512730  | -0.001097328 | 0.632208242 |
| GPX4 cg24783234  | 0.000955965  | 0.88661605  |
| GPX4 cg25540845  | 0.000215889  | 0.977198804 |
| GPX4 cg27106726  | 0.002292129  | 0.65987091  |
| GSTP1 cg02659086 | 0.000329346  | 0.961296857 |
| GSTP1 cg04920951 | 0.005491099  | 0.541380924 |
| GSTP1 cg05244766 | -0.02604273  | 0.469867716 |
| GSTP1 cg06841499 | 0.015306323  | 0.511242337 |
| GSTP1 cg06928838 | 0.005600738  | 0.363734145 |
| GSTP1 cg09038676 | 0.004437578  | 0.552203419 |
| GSTP1 cg11566244 | 0.020706023  | 0.433032039 |
| GSTP1 cg19114214 | 0.01093043   | 0.751347098 |
| GSTP1 cg22224704 | -0.016791559 | 0.639376854 |
| GSTP1 cg23725454 | -0.012617663 | 0.838367944 |
| GSTP1 cg25135322 | -0.029497524 | 0.183599617 |
| GSTP1 cg25866895 | -0.06219665  | 0.105848897 |
| GSTP1 cg26250609 | 0.009410719  | 0.332996846 |
| GTSE1 cg01773692 | -0.00021932  | 0.951483282 |
| GTSE1 cg08629647 | -0.00414294  | 0.223679693 |
| GTSE1 cg18884805 | -9.3208E-05  | 0.989967753 |
| GTSE1 cg21542574 | -0.013452809 | 0.591963406 |
| GTSE1 cg22396353 | -0.000212029 | 0.954149115 |
| GTSE1 cg24015316 | -0.002084922 | 0.443664284 |
| GTSE1 cg24199050 | -0.000167453 | 0.975195982 |
| H2AFZ cg17709884 | -0.000453573 | 0.941117479 |
| H2AFZ cg20934652 | -2.41354E-05 | 0.996386371 |
| HES6 cg02105326  | -0.017045081 | 2.15081E-06 |
| HES6 cg08121041  | -0.124217785 | 3.05072E-06 |
| HES6 cg09163117  | 0.000369694  | 0.953250018 |
| HES6 cg10210789  | -0.008580307 | 0.066904668 |
| HES6 cg10976861  | -0.014983564 | 0.315124018 |
| HES6 cg11027325  | 0.00491986   | 0.449798915 |
| HES6 cg11815105  | -0.002425839 | 0.385820552 |
| HES6 cg15319457  | -0.002662008 | 0.563654145 |
| HES6 cg17283117  | -0.002713949 | 0.530560697 |
| HES6 cg23969423  | -0.071696065 | 0.00169117  |
| HES6 cg24127874  | -0.005523039 | 0.497199076 |

|                     |              |             |
|---------------------|--------------|-------------|
| HINT1 cg01175053    | -0.004379336 | 0.831834383 |
| HINT1 cg07158495    | -0.002441207 | 0.804926473 |
| HINT1 cg08523029    | 0.006409117  | 0.379571741 |
| HINT1 cg10627136    | -0.002232534 | 0.670564176 |
| HINT1 cg12810560    | 0.000524434  | 0.921537877 |
| HINT1 cg14645481    | -0.001442553 | 0.809713742 |
| HINT1 cg15686437    | -0.002018422 | 0.584569373 |
| HINT1 cg20640983    | -0.001029917 | 0.917594856 |
| HINT1 cg24936032    | -0.003798271 | 0.45774032  |
| HINT1 cg26967385    | -0.039709641 | 0.058375217 |
| HINT2 cg01328164    | -0.001920077 | 0.750204634 |
| HINT2 cg13565152    | -0.002952015 | 0.531513061 |
| HINT2 cg13931999    | -0.007980949 | 0.388456845 |
| HINT2 cg27490193    | -0.003086746 | 0.511456998 |
| HIST1H4C cg03376565 | 0.001072759  | 0.780913193 |
| HIST1H4C cg11190156 | -0.002022829 | 0.807904756 |
| HIST1H4C cg12089985 | -0.001711137 | 0.77541858  |
| HIST1H4C cg14648265 | -0.003897451 | 0.458740118 |
| HIST1H4C cg15855450 | -0.007373852 | 0.262850449 |
| HIST1H4C cg18269503 | -0.000740192 | 0.968884346 |
| HIST1H4C cg18364779 | 0.000841558  | 0.951967335 |
| HIST1H4C cg24453353 | 0.001832548  | 0.626761555 |
| HJURP cg00688330    | -0.000320547 | 0.987106344 |
| HJURP cg01835144    | -0.00063711  | 0.905191129 |
| HJURP cg01983548    | -0.030861604 | 0.073236904 |
| HJURP cg02598797    | -0.007835836 | 0.007060219 |
| HJURP cg04550103    | -0.060675638 | 0.086063851 |
| HJURP cg05734866    | -0.005474133 | 0.677918616 |
| HJURP cg06085544    | -0.007033309 | 0.119436024 |
| HJURP cg06310422    | 0.000796121  | 0.908617914 |
| HJURP cg07549195    | -0.010876646 | 0.42322789  |
| HJURP cg08010337    | -0.006884094 | 0.218008038 |
| HJURP cg12802413    | -0.012990839 | 0.275030875 |
| HJURP cg13260726    | -0.001021579 | 0.957388673 |
| HJURP cg14664879    | -0.003165688 | 0.613856369 |
| HJURP cg16639766    | -0.000799015 | 0.809383935 |
| HJURP cg17084697    | -0.004122784 | 0.753852869 |
| HJURP cg17919570    | -0.005295323 | 0.118272143 |
| HJURP cg18553762    | -5.74997E-05 | 0.99437381  |
| HJURP cg21133613    | -0.003966376 | 0.260934102 |
| HJURP cg21542780    | 0.001790936  | 0.678554471 |
| HJURP cg21602955    | -0.000183404 | 0.956326822 |
| HJURP cg24074913    | -0.002273414 | 0.934208035 |
| HJURP cg27143307    | -0.005685519 | 0.445882869 |
| HMGB2 cg00321931    | 0.000297709  | 0.959031565 |
| HMGB2 cg02666901    | -0.001418937 | 0.627236503 |
| HMGB2 cg03002428    | -0.000122115 | 0.979878674 |
| HMGB2 cg03124231    | 0.000707536  | 0.906307723 |
| HMGB2 cg05944369    | 0.003181609  | 0.743703528 |

|                     |              |             |
|---------------------|--------------|-------------|
| HMGB2 cg06841464    | -0.003995862 | 0.286180062 |
| HMGB2 cg08269316    | 0.000770156  | 0.899692975 |
| HMGB2 cg09162056    | -0.003567258 | 0.535239415 |
| HMGB2 cg11186122    | 6.11317E-05  | 0.992124928 |
| HMGB2 cg12571493    | -0.043838495 | 0.09362734  |
| HMGB2 cg13515674    | 0.000677161  | 0.917596647 |
| HMGB2 cg14705778    | 0.006917541  | 0.42637993  |
| HMGB2 cg16569664    | 0.000328948  | 0.968852347 |
| HMGB2 cg19091677    | -0.000115567 | 0.98534806  |
| HMGB2 cg19371349    | 0.005482583  | 0.810712651 |
| HMGB2 cg20409358    | -0.003845436 | 0.384139681 |
| HMGB2 cg21499459    | -0.000322098 | 0.972801371 |
| HMGB2 cg23199053    | -0.006687923 | 0.098295396 |
| HMGB2 cg23467443    | -0.000103576 | 0.982257443 |
| HMGB2 cg23860479    | -0.000404068 | 0.940759768 |
| HMGB2 cg24448859    | 0.002656538  | 0.751466864 |
| HMGB2 cg24551570    | 0.002004411  | 0.92512927  |
| HMGB2 cg25086702    | 0.000404104  | 0.947438699 |
| HMGB2 cg27164753    | 0.002516485  | 0.828840287 |
| HOPX cg00493422     | -0.042412686 | 6.4884E-07  |
| HOPX cg04085076     | -0.059960887 | 1.81103E-05 |
| HOPX cg04307083     | 0.026607273  | 0.520069103 |
| HOPX cg04754315     | -0.013546348 | 0.689071481 |
| HOPX cg06202778     | -0.003731836 | 0.802194375 |
| HOPX cg06771126     | -0.066775695 | 4.29201E-05 |
| HOPX cg09853371     | -0.015790751 | 0.201009004 |
| HOPX cg10800833     | -0.010626896 | 0.384731334 |
| HOPX cg12791492     | -0.004333503 | 0.458189508 |
| HOPX cg13939978     | -0.042225025 | 0.033449687 |
| HOPX cg14196225     | -0.008249575 | 0.609958311 |
| HOPX cg16936060     | -0.090739939 | 0.015219973 |
| HOPX cg16975863     | -0.08553128  | 4.43805E-10 |
| HOPX cg19673329     | -0.119904305 | 8.87449E-06 |
| HOPX cg19978674     | -0.042843686 | 0.282129232 |
| HOPX cg21899596     | -0.004526007 | 0.856254544 |
| HOPX cg24852548     | -0.008774706 | 0.620986402 |
| HOPX cg25456368     | -0.05198879  | 0.022281665 |
| HOPX cg25948037     | -0.058111991 | 0.09131948  |
| HOPX cg27305383     | -0.020469787 | 0.427416863 |
| ITGB1BP1 cg00024812 | 0.000956058  | 0.646975781 |
| ITGB1BP1 cg00522231 | -0.008508882 | 0.785419832 |
| ITGB1BP1            | -0.001062505 | 0.79537251  |
| ITGB1BP1 cg07814910 | -0.002325021 | 0.603728285 |
| ITGB1BP1 cg07974891 | -0.149001763 | 7.19173E-10 |
| ITGB1BP1 cg08100159 | -0.03054094  | 0.07390772  |
| ITGB1BP1 cg08937729 | -0.005669533 | 0.284440311 |
| ITGB1BP1 cg09734418 | 0.006593918  | 0.849821757 |
| ITGB1BP1 cg09761705 | 0.002026119  | 0.781199657 |
| ITGB1BP1 cg09949845 | -0.002386757 | 0.318798032 |

|                     |              |             |
|---------------------|--------------|-------------|
| ITGB1BP1 cg20093808 | 0.000332179  | 0.927987565 |
| ITGB1BP1 cg20361001 | -0.00104382  | 0.86603679  |
| ITGB1BP1 cg23889771 | -0.000998446 | 0.753726749 |
| ITGB1BP1 cg24873957 | -0.004671204 | 0.336990766 |
| ITGB1BP1 cg26306976 | -0.035193739 | 0.165099241 |
| KCNQ1OT1 cg01744331 | -0.069504562 | 0.009700171 |
| KCNQ1OT1 cg01873334 | 0.000486619  | 0.986311971 |
| KCNQ1OT1 cg01893176 | 0.006054216  | 0.841072211 |
| KCNQ1OT1 cg02219360 | 0.003311901  | 0.920162106 |
| KCNQ1OT1 cg02798157 | 0.001827719  | 0.947522264 |
| KCNQ1OT1 cg03401726 | -0.010019039 | 0.568005071 |
| KCNQ1OT1 cg03422070 | 0.001735026  | 0.960917419 |
| KCNQ1OT1 cg03654058 | -0.047636832 | 0.032558574 |
| KCNQ1OT1 cg04762676 | -0.014022766 | 0.000504286 |
| KCNQ1OT1 cg05740879 | 0.017040572  | 0.506522574 |
| KCNQ1OT1 cg05816130 | 0.008083894  | 0.795239998 |
| KCNQ1OT1 cg06809295 | -0.053811322 | 2.5177E-05  |
| KCNQ1OT1 cg07595203 | 0.003180732  | 0.911398519 |
| KCNQ1OT1 cg08359167 | 0.003802253  | 0.804049772 |
| KCNQ1OT1 cg08446215 | 0.009879592  | 0.753258553 |
| KCNQ1OT1 cg09518720 | 0.01531385   | 0.381700205 |
| KCNQ1OT1 cg11272547 | -0.081690698 | 0.001393903 |
| KCNQ1OT1 cg11666921 | 0.001769054  | 0.939708668 |
| KCNQ1OT1 cg12077660 | -0.003837404 | 0.856611782 |
| KCNQ1OT1 cg12433386 | -0.03060689  | 0.247650799 |
| KCNQ1OT1 cg14243741 | 0.005645118  | 0.851398003 |
| KCNQ1OT1 cg14958441 | 0.016508633  | 0.484911931 |
| KCNQ1OT1 cg15651941 | -0.009748912 | 0.708615593 |
| KCNQ1OT1 cg16556677 | -0.083646461 | 0.001273695 |
| KCNQ1OT1 cg16739686 | 0.009383892  | 0.738851994 |
| KCNQ1OT1 cg23906872 | -0.033392208 | 0.023539049 |
| KCNQ1OT1 cg25306939 | 0.00559026   | 0.855738089 |
| KCNQ1OT1 cg26094482 | 0.003054905  | 0.897965407 |
| KCNQ1OT1 cg26104781 | 0.005523104  | 0.866593233 |
| KCNQ1OT1 cg26963277 | -0.075840893 | 0.002246912 |
| KCNQ1OT1 cg27323091 | 0.010084546  | 0.538855979 |
| KIAA0101 cg00223963 | -0.001626052 | 0.976367413 |
| KIAA0101 cg02065795 | -0.000386547 | 0.950834206 |
| KIAA0101 cg03849685 | 0.001169212  | 0.742003091 |
| KIAA0101 cg05877740 | 0.001189346  | 0.816026615 |
| KIAA0101 cg08128680 | 0.002200507  | 0.337015602 |
| KIAA0101 cg09214993 | 0.002395793  | 0.587735418 |
| KIAA0101 cg11741168 | -0.002032281 | 0.738822866 |
| KIAA0101 cg19839691 | 0.002083723  | 0.509255551 |
| KIAA0101 cg22679412 | 0.003864698  | 0.941989337 |
| KIAA0101 cg23386807 | 0.00168291   | 0.707219749 |
| KIAA0101 cg26155739 | 0.002594247  | 0.908204708 |
| KIAA0101 cg26889367 | 0.003578422  | 0.29294593  |
| KIF23 cg00126739    | 0.00186902   | 0.499313453 |



|                  |              |             |
|------------------|--------------|-------------|
| KIF23 cg01906442 | 0.000259895  | 0.963239905 |
| KIF23 cg02714566 | -0.002998411 | 0.432763152 |
| KIF23 cg05717833 | 0.005685141  | 0.333658348 |
| KIF23 cg05749577 | -0.001837014 | 0.727245612 |
| KIF23 cg06869971 | -0.0044491   | 0.537035372 |
| KIF23 cg08817171 | -0.004985452 | 0.239906393 |
| KIF23 cg15465548 | -0.003040135 | 0.719723753 |
| KIF23 cg15642412 | -0.000686127 | 0.810342585 |
| KIF23 cg16587794 | -0.000166316 | 0.978489341 |
| KIF23 cg22240424 | 0.001008047  | 0.894082911 |
| KIF23 cg22412481 | -0.037547176 | 0.009360687 |
| KIF23 cg24170947 | -0.003170127 | 0.508996468 |
| KIF23 cg24657687 | -0.00046663  | 0.910572035 |
| KIF23 cg25142045 | -0.099364916 | 0.000139539 |
| KIF23 cg27514624 | -0.003313813 | 0.795052958 |
| KIF2C cg00148881 | 0.000370161  | 0.949677777 |
| KIF2C cg00251536 | 6.88165E-06  | 0.999390307 |
| KIF2C cg00455333 | -0.001271223 | 0.725506558 |
| KIF2C cg02890457 | 0.00093304   | 0.828115039 |
| KIF2C cg03331258 | -0.001117301 | 0.841815351 |
| KIF2C cg03907454 | 0.00635037   | 0.678221345 |
| KIF2C cg06922130 | 0.000245061  | 0.962389637 |
| KIF2C cg12269116 | -0.000137276 | 0.969620959 |
| KIF2C cg12276329 | 0.000395359  | 0.92789013  |
| KIF2C cg17418643 | -0.026694137 | 0.248970364 |
| KIF2C cg20487572 | -0.046089819 | 0.003924937 |
| KIF2C cg24539339 | -0.02213449  | 0.126385265 |
| KPNA2 cg05771398 | -0.00076638  | 0.928028015 |
| KPNA2 cg06090053 | -0.001782214 | 0.889189635 |
| KPNA2 cg06390411 | -0.002168134 | 0.767428775 |
| KPNA2 cg09771049 | -0.017759989 | 0.144635036 |
| KPNA2 cg13777502 | 0.008044904  | 0.703977811 |
| KPNA2 cg14732136 | -0.002764945 | 0.870598657 |
| KPNA2 cg14898140 | -0.003236354 | 0.809455843 |
| KPNA2 cg16501440 | 0.000274177  | 0.961340771 |
| KPNA2 cg17985418 | -0.004528325 | 0.594061779 |
| KPNA2 cg21018429 | -0.00119423  | 0.846644646 |
| KPNA2 cg21820889 | -0.000494957 | 0.932444441 |
| KPNA2 cg22429852 | -0.007540669 | 0.88715083  |
| KPNA2 cg23206777 | -0.003744652 | 0.560317863 |
| LMNB1 cg01077085 | 7.17814E-05  | 0.98044301  |
| LMNB1 cg04284063 | -0.071198544 | 0.013655051 |
| LMNB1 cg05484879 | -0.003724087 | 0.216029254 |
| LMNB1 cg06405317 | -0.025719352 | 0.018659909 |
| LMNB1 cg08568504 | -0.003394878 | 0.775098713 |
| LMNB1 cg10204478 | -0.005310561 | 0.822080074 |
| LMNB1 cg14064399 | 0.002604856  | 0.443999185 |
| LMNB1 cg16089416 | -0.007575079 | 0.153088135 |
| LMNB1 cg17248495 | -0.000540835 | 0.942604341 |

|                   |              |             |
|-------------------|--------------|-------------|
| LMNB1 cg18262958  | 0.000641253  | 0.781598877 |
| LMNB1 cg20986134  | -0.002060651 | 0.592033336 |
| LMNB1 cg22007501  | -0.00671855  | 0.066647488 |
| LMNB1 cg22183605  | -0.003845646 | 0.432791525 |
| LMNB1 cg23953133  | -0.001964193 | 0.837719857 |
| LMNB1 cg25022925  | 0.00390194   | 0.743876232 |
| LMNB1 cg26611836  | -0.001763869 | 0.750445986 |
| LLRN1 cg00742851  | -0.099596643 | 1.95492E-11 |
| LLRN1 cg01300546  | -0.006655769 | 0.091340124 |
| LLRN1 cg01442531  | -0.160582213 | 2.3731E-08  |
| LLRN1 cg02276274  | 0.027393276  | 0.161546288 |
| LLRN1 cg03280839  | 0.003198299  | 0.769820055 |
| LLRN1 cg03930929  | -0.079445623 | 0.01054894  |
| LLRN1 cg04150219  | -0.032674905 | 0.024519119 |
| LLRN1 cg06152533  | 0.004443486  | 0.820568482 |
| LLRN1 cg08556718  | -0.167519097 | 2.9307E-05  |
| LLRN1 cg08844848  | 0.000751626  | 0.956621377 |
| LLRN1 cg09615224  | -0.003809298 | 0.32268864  |
| LLRN1 cg09623845  | -0.124394747 | 8.61331E-10 |
| LLRN1 cg09665338  | -0.144458343 | 4.25389E-06 |
| LLRN1 cg10507275  | -0.001787409 | 0.839718073 |
| LLRN1 cg12136608  | 0.001791202  | 0.958258926 |
| LLRN1 cg14784497  | -0.007518266 | 0.12783209  |
| LLRN1 cg15482530  | -0.004719338 | 0.21414784  |
| LLRN1 cg15999997  | -0.05879329  | 0.001870511 |
| LLRN1 cg17199247  | 0.003231953  | 0.746144121 |
| LLRN1 cg17792833  | -0.025560871 | 0.001061406 |
| LLRN1 cg17912112  | -0.006293736 | 0.66666557  |
| LLRN1 cg18739166  | -0.108588804 | 7.54621E-10 |
| LLRN1 cg20438207  | -0.088386551 | 0.00347707  |
| LLRN1 cg22595235  | -0.005809623 | 0.181471961 |
| LLRN1 cg23238483  | -0.16370328  | 7.17894E-09 |
| LLRN1 cg23479065  | -0.12524713  | 6.052E-09   |
| LLRN1 cg25095722  | -0.000653622 | 0.936945814 |
| LLRN1 cg26163699  | -0.001198607 | 0.853297711 |
| LLRN1 cg27570309  | -0.129099997 | 4.0723E-05  |
| LSMD1 cg06935501  | 3.54126E-05  | 0.994654996 |
| LSMD1 cg07402456  | 0.007139905  | 0.316399053 |
| LSMD1 cg07666210  | -0.008379728 | 0.487440024 |
| MAD2L1 cg00680768 | -0.001316952 | 0.941256262 |
| MAD2L1 cg01131147 | 0.000110022  | 0.972044388 |
| MAD2L1 cg03799581 | -0.031448503 | 0.427298206 |
| MAD2L1 cg05233515 | -0.004949556 | 0.458854676 |
| MAD2L1 cg05985659 | -0.000239925 | 0.949220738 |
| MAD2L1 cg06918925 | -0.00129169  | 0.632294911 |
| MAD2L1 cg16225753 | 0.000844045  | 0.814081471 |
| MAD2L1 cg21262733 | -0.002157603 | 0.713195192 |
| MAD2L1 cg23781003 | 0.001161913  | 0.717796261 |
| MAD2L1 cg27080119 | 0.00041172   | 0.957560719 |

|                    |              |             |
|--------------------|--------------|-------------|
| MAD2L1 cg27094117  | 0.001031442  | 0.760061007 |
| MALAT1 cg01185801  | -0.002046191 | 0.509890147 |
| MALAT1 cg02652361  | -0.052600923 | 2.14146E-05 |
| MALAT1 cg02943285  | 0.00237447   | 0.535756778 |
| MALAT1 cg04073608  | 0.001788435  | 0.672692132 |
| MALAT1 cg04378603  | -0.004377353 | 0.614330116 |
| MALAT1 cg04868132  | 0.002079697  | 0.446218762 |
| MALAT1 cg04977124  | 0.007689193  | 0.623878347 |
| MALAT1 cg05491695  | 0.007037535  | 0.656494648 |
| MALAT1 cg07799005  | 0.000431663  | 0.945228351 |
| MALAT1 cg10631284  | -0.000738355 | 0.924857709 |
| MALAT1 cg12498916  | -0.000205074 | 0.988698067 |
| MALAT1 cg14690315  | 0.002779575  | 0.463600876 |
| MALAT1 cg15574972  | 0.000262289  | 0.987026915 |
| MALAT1 cg17153055  | -0.000311664 | 0.958912085 |
| MALAT1 cg18501142  | -0.003234184 | 0.682620346 |
| MALAT1 cg19878733  | 0.001127106  | 0.879523065 |
| MALAT1 cg20503416  | -0.00319373  | 0.544166016 |
| MALAT1 cg22311458  | -0.006761525 | 0.296792722 |
| MALAT1 cg23566411  | -0.002241422 | 0.889794207 |
| MALAT1 cg26489875  | -0.002145877 | 0.699989406 |
| MANF cg01044394    | -0.006726269 | 0.281881268 |
| MANF cg02225143    | -0.004338731 | 0.401629893 |
| MANF cg02255184    | -0.002040416 | 0.787274253 |
| MANF cg02264238    | -0.032262057 | 0.114923895 |
| MANF cg04007931    | -0.006817053 | 0.316973236 |
| MANF cg07118985    | -0.011393915 | 0.138123088 |
| MANF cg08058672    | 0.024586924  | 0.369193717 |
| MANF cg08667777    | -0.00642124  | 0.129630227 |
| MANF cg10029076    | 0.014531823  | 0.374566453 |
| MANF cg15881088    | -0.003105456 | 0.341431459 |
| MANF cg18639405    | -0.004011916 | 0.527382225 |
| MANF cg18861151    | -0.003765408 | 0.471794598 |
| MANF cg20936475    | -0.000825856 | 0.904012772 |
| MANF cg21034633    | 0.00451616   | 0.729923611 |
| MANF cg22477501    | -0.002766114 | 0.589807254 |
| MANF cg24295551    | -0.002262252 | 0.743151697 |
| MARCKSL cg00292107 | -0.069833539 | 3.2119E-10  |
| MARCKSL cg00556029 | -0.01516101  | 0.075424    |
| MARCKSL cg02455803 | -0.001552383 | 0.783830933 |
| MARCKSL cg04348222 | 0.049052882  | 0.038537152 |
| MARCKSL cg06221946 | 0.022660538  | 0.191059049 |
| MARCKSL cg07092593 | -0.000898203 | 0.78435531  |
| MARCKSL cg09072560 | -0.024159641 | 0.028149435 |
| MARCKSL cg09327628 | -0.0042605   | 0.158604429 |
| MARCKSL cg22710219 | -0.005766683 | 0.251814152 |
| MEA1 cg00857557    | -0.001559338 | 0.850708849 |
| MEA1 cg03535439    | -0.000200795 | 0.962846635 |
| MEA1 cg04616717    | 0.001158683  | 0.894964959 |

|                   |              |             |
|-------------------|--------------|-------------|
| MEA1 cg06802599   | 0.000879968  | 0.79972174  |
| MEA1 cg10599035   | -0.000994778 | 0.790483024 |
| MEA1 cg13397365   | 0.000922101  | 0.85665554  |
| MEA1 cg13871588   | 0.000677224  | 0.798941981 |
| MEA1 cg15057823   | 0.001337456  | 0.787259231 |
| MEA1 cg15329277   | -0.027492483 | 0.327745612 |
| MEA1 cg16044674   | -0.007048382 | 0.360664865 |
| MEA1 cg20235337   | 0.001408998  | 0.853914472 |
| MEA1 cg20494108   | -0.003137169 | 0.735502266 |
| MEA1 cg21910650   | -0.026544375 | 0.651256229 |
| MEA1 cg23661578   | -0.009542307 | 0.41582334  |
| MFNG cg01765930   | -0.027818102 | 0.564178576 |
| MFNG cg03737999   | 0.005599404  | 0.35184206  |
| MFNG cg11201532   | -0.037322167 | 0.417312759 |
| MFNG cg17066620   | 0.001710007  | 0.781826434 |
| MFNG cg17809471   | -0.000501655 | 0.93105067  |
| MFNG cg18452324   | 0.000202747  | 0.989740375 |
| MFNG cg22406469   | -0.022537085 | 0.515918652 |
| MFNG cg25597784   | -0.021194629 | 0.587163839 |
| MKI67 cg02707638  | 0.002168932  | 0.379147055 |
| MKI67 cg04074793  | 0.002198835  | 0.675934621 |
| MKI67 cg06442750  | -0.0016622   | 0.939595842 |
| MKI67 cg07066918  | 0.006410471  | 0.789154449 |
| MKI67 cg07314148  | -0.010062652 | 0.643667737 |
| MKI67 cg13188795  | -0.023389943 | 0.360238919 |
| MKI67 cg17295447  | -0.09799901  | 0.00011853  |
| MKI67 cg17850838  | -0.003108746 | 0.470073539 |
| MKI67 cg17929627  | 0.001343378  | 0.792614545 |
| MKI67 cg18691055  | 0.002755548  | 0.840731586 |
| MKI67 cg18785410  | 0.000310486  | 0.937941997 |
| MKI67 cg26235537  | 0.007434171  | 0.623391348 |
| MPRL37 cg04095833 |              |             |
| MPRL37 cg08622517 |              |             |
| MPRL37 cg10535847 |              |             |
| MPRL37 cg19019972 |              |             |
| MT2A cg01190915   | 0.001640663  | 0.845614121 |
| MT2A cg01910484   | 0.002069722  | 0.751456172 |
| MT2A cg06663317   | 0.12297381   | 0.000263221 |
| MT2A cg07395075   | -0.008444609 | 0.232896971 |
| MT2A cg08409642   | 0.141986153  | 2.4116E-07  |
| MT2A cg16737422   | -0.001547887 | 0.678668444 |
| MT2A cg17886959   | 0.064305184  | 0.033103473 |
| MT2A cg23581183   | 0.006761576  | 0.83229494  |
| MXD3 cg02693857   | -0.001859981 | 0.579323826 |
| MXD3 cg04586126   | 0.066461913  | 0.000307481 |
| MXD3 cg07671752   | 0.026701671  | 0.033889939 |
| MXD3 cg08076617   | -0.002812555 | 0.803172896 |
| MXD3 cg09044296   | 0.01236174   | 0.286630801 |
| MXD3 cg09564133   | -0.006989549 | 0.140944894 |

|                  |              |             |
|------------------|--------------|-------------|
| MXD3 cg10533277  | -0.000373612 | 0.929968103 |
| MXD3 cg13278795  | 0.003459271  | 0.418880884 |
| MXD3 cg16616449  | 0.004131374  | 0.724318573 |
| MXD3 cg18465082  | 0.039350126  | 0.104967761 |
| MXD3 cg25101061  | -0.001752915 | 0.710308229 |
| MXD3 cg25213720  | 0.066561174  | 0.00079112  |
| MXD3 cg25368647  | -0.09683877  | 5.14996E-08 |
| MXD3 cg26087598  | -0.002236768 | 0.569107522 |
| MYC cg00163372   | -0.012950891 | 0.571536782 |
| MYC cg00611675   | 0.004922809  | 0.572952495 |
| MYC cg01052743   | -0.000523319 | 0.941497881 |
| MYC cg01203549   | -0.000971456 | 0.834393845 |
| MYC cg03003858   | 0.002409917  | 0.696391674 |
| MYC cg03076047   | -0.002037599 | 0.739476708 |
| MYC cg03498895   | -0.005705299 | 0.586962099 |
| MYC cg05927173   | -0.001051698 | 0.896891493 |
| MYC cg07871324   | 0.001908216  | 0.647984594 |
| MYC cg08428512   | -0.001368579 | 0.789561253 |
| MYC cg08526705   | -0.019455959 | 0.312681075 |
| MYC cg10302505   | 0.000872743  | 0.871631903 |
| MYC cg10340053   | -3.71064E-05 | 0.994431335 |
| MYC cg10832291   | 0.000906202  | 0.96622384  |
| MYC cg10836034   | -0.000157415 | 0.972664814 |
| MYC cg11688275   | 0.001139704  | 0.902699014 |
| MYC cg12057615   | -0.000638394 | 0.906168855 |
| MYC cg13244804   | -0.003445888 | 0.735902803 |
| MYC cg14732699   | -6.33117E-05 | 0.997248388 |
| MYC cg15465092   | -0.003465938 | 0.580975843 |
| MYC cg15801573   | -0.008291166 | 0.410239535 |
| MYC cg16100135   | 0.001893517  | 0.699925329 |
| MYC cg17160660   | -0.011653633 | 0.081272169 |
| MYC cg17299732   | -0.007637958 | 0.533110976 |
| MYC cg17505251   | -0.000998366 | 0.774412845 |
| MYC cg19972619   | 0.001313858  | 0.849020339 |
| MYC cg21803052   | 0.004007645  | 0.1248498   |
| MYC cg22331096   | 0.001679044  | 0.812229475 |
| MYC cg23187103   | -0.000169599 | 0.984475599 |
| MYC cg24666276   | 0.001991114  | 0.849825372 |
| MYC cg25080152   | 0.006315789  | 0.337716088 |
| MYC cg25826331   | -0.000417898 | 0.945773939 |
| MYC cg26221243   | 0.001791112  | 0.645889829 |
| MYC cg26441142   | -0.000145069 | 0.972423294 |
| MYC cg27045396   | -0.00320235  | 0.83557214  |
| MYC cg27207274   | -0.002608937 | 0.502731984 |
| NCAPG cg02810967 | -0.050255082 | 2.6384E-06  |
| NCAPG cg03509813 | -0.002357897 | 0.712458049 |
| NCAPG cg03604819 | -0.003463118 | 0.454155049 |
| NCAPG cg06034885 | -0.000843729 | 0.946945464 |
| NCAPG cg06549407 | 0.005809896  | 0.722345178 |

|                   |              |             |
|-------------------|--------------|-------------|
| NCAPG cg10333701  | 0.001225648  | 0.867505322 |
| NCAPG cg11390445  | -0.002644749 | 0.299406804 |
| NCAPG cg13111374  | -0.00105534  | 0.843282903 |
| NCAPG cg14377370  | -0.002734107 | 0.540008464 |
| NCAPG cg21454030  | -0.000419743 | 0.980166833 |
| NCAPG cg22496254  | -0.023350148 | 0.0290401   |
| NCAPG cg23435440  | -0.00366807  | 0.751154605 |
| NCAPG cg26071746  | -0.001378188 | 0.75438093  |
| NDC80 cg00277996  | 0.000245048  | 0.979544256 |
| NDC80 cg02807146  | -0.002476671 | 0.59043445  |
| NDC80 cg05407825  | -6.55116E-05 | 0.99119581  |
| NDC80 cg06454226  | -0.093144145 | 4.0975E-10  |
| NDC80 cg07333223  | -0.001164919 | 0.75849833  |
| NDC80 cg13425515  | -0.000297173 | 0.952330254 |
| NDC80 cg14313868  | -0.000674131 | 0.886366056 |
| NDC80 cg16421612  | 0.00630277   | 0.034401367 |
| NDC80 cg16932672  | -0.001106053 | 0.819400168 |
| NDC80 cg17241550  | 0.002127521  | 0.79957583  |
| NDC80 cg26393983  | -0.000188875 | 0.959234701 |
| NDC80 cg26661543  | -0.000132768 | 0.970592433 |
| NDUFA4 cg01145709 | -0.002272    | 0.752247184 |
| NDUFA4 cg01945793 | -0.002621223 | 0.500969017 |
| NDUFA4 cg02076804 | 0.002112871  | 0.265270567 |
| NDUFA4 cg05143012 | -0.019527975 | 0.523154821 |
| NDUFA4 cg05715003 | 0.001755901  | 0.401812521 |
| NDUFA4 cg08929390 | -0.005209451 | 0.477418148 |
| NDUFA4 cg10938970 | -0.002549967 | 0.301740115 |
| NDUFA4 cg10940374 | 0.002179341  | 0.592397088 |
| NDUFA4 cg14972755 | 0.003047336  | 0.367491317 |
| NDUFA4 cg16837769 | 0.00067278   | 0.768257896 |
| NDUFA4 cg17268726 | -0.010240243 | 0.207243961 |
| NDUFA4 cg17695010 | 0.002160524  | 0.331938122 |
| NDUFA4 cg21053748 | -0.000311871 | 0.932848979 |
| NDUFA4 cg23711939 | -0.003736933 | 0.325587798 |
| NDUFA6 cg00395296 | 0.002224214  | 0.936083493 |
| NDUFA6 cg01529207 | 0.002706442  | 0.952748574 |
| NDUFA6 cg02050560 | 0.002141238  | 0.77547194  |
| NDUFA6 cg02882774 | 4.53E-05     | 0.994419384 |
| NDUFA6 cg03805410 | -0.000491609 | 0.886499199 |
| NDUFA6 cg04607975 | -0.002875835 | 0.441268193 |
| NDUFA6 cg04764416 | 0.002416978  | 0.568064231 |
| NDUFA6 cg07601932 | -0.00458747  | 0.299126363 |
| NDUFA6 cg07890336 | 0.00016586   | 0.986213559 |
| NDUFA6 cg07987587 | -0.004937766 | 0.74836287  |
| NDUFA6 cg08957018 | -0.003168313 | 0.774744968 |
| NDUFA6 cg10846032 | -0.003466443 | 0.343128718 |
| NDUFA6 cg11189039 | -0.001682386 | 0.771122214 |
| NDUFA6 cg16085276 | -0.001567901 | 0.664589313 |
| NDUFA6 cg21025089 | -0.002265226 | 0.753582613 |

|                   |              |             |
|-------------------|--------------|-------------|
| NDUFA6 cg22183448 | 0.00786833   | 0.598764069 |
| NDUFS8 cg05463966 | 0.087471407  | 0.000216733 |
| NDUFS8 cg05753046 | -0.046056769 | 0.073764776 |
| NDUFS8 cg07693657 | -0.005664542 | 0.624504224 |
| NDUFS8 cg08139833 | -0.002537696 | 0.43613243  |
| NDUFS8 cg12070987 | 0.098906262  | 9.35699E-10 |
| NDUFS8 cg14943827 | -0.00217583  | 0.882608723 |
| NDUFS8 cg16546622 | -0.005276474 | 0.508906445 |
| NDUFS8 cg16906595 | 0.000906117  | 0.827740714 |
| NDUFS8 cg17583008 | -0.007304007 | 0.295321227 |
| NDUFS8 cg18386131 | -0.001489831 | 0.831144795 |
| NDUFS8 cg20906345 | 0.000103387  | 0.995342515 |
| NDUFS8 cg22247282 | 0.003021566  | 0.797482205 |
| NDUFS8 cg22951283 | -0.003251198 | 0.574291485 |
| NDUFS8 cg23962826 | -0.002018933 | 0.811533039 |
| NDUFS8 cg24713080 | -0.000710004 | 0.946614666 |
| NDUFS8 cg24757160 | 0.04790433   | 0.000117466 |
| NDUFS8 cg26209546 | 0.000274863  | 0.958675367 |
| NDUFS8 cg26406131 | 0.030014418  | 0.369433476 |
| NEK2 cg07170222   | 0.001823289  | 0.773467095 |
| NEK2 cg09897338   | -0.001382356 | 0.841232229 |
| NEK2 cg11225435   | -0.002125205 | 0.543167564 |
| NEK2 cg15831905   | 0.016088649  | 0.614505107 |
| NEK2 cg17241013   | -9.567E-05   | 0.991122051 |
| NEK2 cg17931972   | -0.109066801 | 0.000110681 |
| NEK2 cg21395147   | 0.00155873   | 0.898290862 |
| NEK2 cg24458466   | 0.017362361  | 0.140315932 |
| NEK2 cg26036067   | -0.001001447 | 0.87667941  |
| NEU4 cg01987333   | -0.083817918 | 0.00058308  |
| NEU4 cg03372905   | -0.154743225 | 7.21069E-07 |
| NEU4 cg03877418   | -0.014682339 | 0.095154627 |
| NEU4 cg05195017   | 0.132602197  | 1.34703E-10 |
| NEU4 cg08180831   | -0.15724828  | 6.26677E-09 |
| NEU4 cg10504150   | -0.10091717  | 0.000116195 |
| NEU4 cg11452267   | -0.096753883 | 4.30895E-11 |
| NEU4 cg11706790   | -0.109229494 | 0.001177418 |
| NEU4 cg15576082   | -0.197214131 | 5.51872E-11 |
| NEU4 cg15746851   | -0.05370513  | 0.000109412 |
| NEU4 cg16660312   | -0.131010815 | 1.6842E-05  |
| NEU4 cg17280514   | 0.002247411  | 0.965694935 |
| NEU4 cg17696563   | -0.025679078 | 0.041231182 |
| NEU4 cg17981927   | -0.06254452  | 0.000456876 |
| NEU4 cg18095041   | -0.134534006 | 2.22444E-06 |
| NEU4 cg18485872   | -0.080015667 | 0.00055928  |
| NEU4 cg19007167   | -0.104299643 | 0.001522375 |
| NEU4 cg20052509   | 0.005823522  | 0.59050397  |
| NEU4 cg20189808   | -0.052495446 | 0.018756342 |
| NEU4 cg20791593   | -0.097996485 | 2.95247E-10 |
| NEU4 cg21570020   | 0.017696672  | 0.017861511 |

|                   |              |             |
|-------------------|--------------|-------------|
| NEU4 cg22399646   | -0.060948687 | 0.005640416 |
| NEU4 cg24429037   | -0.141053102 | 0.000107796 |
| NEU4 cg24629571   | 0.002731714  | 0.919022124 |
| NEU4 cg26034168   | -0.087577938 | 3.66178E-08 |
| NMB cg03822754    | 0.007650248  | 0.562012443 |
| NMB cg12220058    | -0.030860587 | 0.00115068  |
| NMB cg12863693    | -0.050507505 | 0.017588937 |
| NMB cg13893221    | -0.001089376 | 0.929734033 |
| NMB cg17173187    | -0.031318207 | 0.003829213 |
| NMB cg17891194    | -0.001699193 | 0.485165236 |
| NMB cg18582073    | -0.004521155 | 0.547632328 |
| NMB cg19517291    | -0.001873814 | 0.952205123 |
| NMB cg19997245    | 0.005668451  | 0.783194829 |
| NMB cg20915763    | -0.063121306 | 0.005727583 |
| NMB cg24134342    | 0.035922019  | 0.105708186 |
| NMB cg25653336    | -0.010703569 | 0.681904498 |
| NMB cg26576155    | 0.004593902  | 0.641826875 |
| NMB cg27032142    | -0.002710666 | 0.316399387 |
| NMB cg27379587    | 0.007529062  | 0.492576056 |
| NMB cg27417717    | 0.008075154  | 0.157478527 |
| NUF2 cg01964683   | -0.002436515 | 0.705500156 |
| NUF2 cg09936566   | -0.00061568  | 0.878721012 |
| NUF2 cg11823214   | -0.004814587 | 0.486816665 |
| NUF2 cg15778350   | -0.016068405 | 0.101987762 |
| NUF2 cg16604136   | -0.002182397 | 0.811632297 |
| NUF2 cg17428694   | -0.000172898 | 0.981951019 |
| NUF2 cg21934237   | -0.001727299 | 0.667762014 |
| NUF2 cg21959457   | 0.038922121  | 0.384150504 |
| NUF2 cg26029744   | -0.001042955 | 0.765152518 |
| NUF2 cg27042667   | -0.021694198 | 0.000602666 |
| NUSAP1 cg02417622 | 0.003214303  | 0.596447912 |
| NUSAP1 cg07501391 | -0.001314472 | 0.863261617 |
| NUSAP1 cg07883696 | 0.002005953  | 0.865842032 |
| NUSAP1 cg08782897 | 0.003259833  | 0.268473112 |
| NUSAP1 cg11324740 | -0.00044951  | 0.906292958 |
| NUSAP1 cg12822975 | -0.001514837 | 0.533501307 |
| NUSAP1 cg13345248 | 0.000395718  | 0.941719706 |
| NUSAP1 cg13503364 | -0.00116839  | 0.832822249 |
| NUSAP1 cg14581502 | 0.000676038  | 0.875624009 |
| NUSAP1 cg16711321 | 0.006186692  | 0.070668388 |
| NUSAP1 cg19105821 | 0.000164865  | 0.976369715 |
| NUSAP1 cg21071862 | -0.000870854 | 0.808779899 |
| NUSAP1 cg21284844 | -0.002567235 | 0.322392281 |
| NUSAP1 cg24696207 | -0.00500943  | 0.500857516 |
| NUSAP1 cg25217313 | 0.001228955  | 0.8457816   |
| NUSAP1 cg25861327 | 0.001149948  | 0.783513695 |
| NUSAP1 cg26516489 | 0.00229254   | 0.612474557 |
| NUSAP1 cg27127142 | 0.005757435  | 0.563934478 |
| OLIG1 cg02348151  | -0.012120482 | 0.599749074 |



|                   |              |             |
|-------------------|--------------|-------------|
| OLIG1 cg02736969  | -0.003774609 | 0.26111608  |
| OLIG1 cg03732762  | -0.000392342 | 0.951500223 |
| OLIG1 cg03867475  | -0.000138862 | 0.986430348 |
| OLIG1 cg04351905  | -0.030640866 | 0.429063574 |
| OLIG1 cg05442477  | -0.095947494 | 9.64586E-08 |
| OLIG1 cg05522774  | -0.009639401 | 0.16860039  |
| OLIG1 cg05720454  | -0.00328798  | 0.459456102 |
| OLIG1 cg06106763  | -0.007010512 | 0.405490589 |
| OLIG1 cg06570025  | 0.006956636  | 0.5647678   |
| OLIG1 cg15893431  | -0.029135181 | 0.204381575 |
| OLIG1 cg17016394  | -0.005947516 | 0.787071931 |
| OLIG1 cg20340508  | -0.005539826 | 0.866846705 |
| OLIG1 cg21569006  | -0.006348667 | 0.234478356 |
| OLIG1 cg26770917  | -0.000742142 | 0.827709943 |
| OLIG1 cg27237300  | -0.009038438 | 0.78611191  |
| OLIG1 cg27280904  | -0.000776099 | 0.867604246 |
| PBK cg00410990    | -0.000867616 | 0.834274383 |
| PBK cg01579019    | 0.001410672  | 0.848600491 |
| PBK cg06816054    | -0.01971191  | 0.002073326 |
| PBK cg11026430    | -0.001472272 | 0.788563255 |
| PBK cg12863373    | -0.003301171 | 0.248681357 |
| PBK cg17795291    | 0.005011596  | 0.771889433 |
| PBK cg17973773    | -0.072789581 | 0.026643035 |
| PBK cg21177558    | 0.000716479  | 0.929487015 |
| PBK cg21210376    | -0.036635438 | 0.028566032 |
| PBK cg21734487    | -0.00181652  | 0.649137649 |
| PBK cg21887430    | -0.070164508 | 0.002319623 |
| PBK cg26261431    | -0.014155909 | 0.124560804 |
| PBK cg27310938    | 0.000999976  | 0.89649667  |
| PCOLCE cg01197156 | -0.129488241 | 1.19909E-05 |
| PCOLCE cg01706943 | 0.007297885  | 0.90329752  |
| PCOLCE cg02797569 | -0.052229901 | 0.124047543 |
| PCOLCE cg04522932 | -0.017904909 | 0.236397006 |
| PCOLCE cg05920870 | -0.022605089 | 0.004943847 |
| PCOLCE cg06330722 | -6.70907E-05 | 0.992243849 |
| PCOLCE cg09326362 | -0.00427192  | 0.334793508 |
| PCOLCE cg13655570 | -0.004300753 | 0.159887463 |
| PCOLCE cg14047091 | -0.002864011 | 0.930002378 |
| PCOLCE cg18178595 | -0.041680397 | 0.025700759 |
| PCOLCE cg19685521 | -0.022059794 | 0.54883864  |
| PCOLCE cg21684654 | -0.03016818  | 0.083029613 |
| PCOLCE cg22082800 | -0.046793554 | 0.120260996 |
| PCOLCE cg25680486 | -0.075125965 | 0.002726884 |
| PCOLCE cg26100986 | -0.052578531 | 0.007200204 |
| PCOLCE cg26122963 | -0.075940868 | 0.00230628  |
| PCOLCE cg26777475 | -0.04051138  | 0.370101271 |
| PCOLCE cg27069566 | -0.047885987 | 0.168211375 |
| PFN1 cg00581295   | 0.00080089   | 0.923748186 |
| PFN1 cg06308537   | 0.003935365  | 0.827618851 |

|                   |              |              |
|-------------------|--------------|--------------|
| PFN1 cg06554928   | -0.002448247 | 0.465504688  |
| PFN1 cg07465344   | -0.017716873 | 0.619549103  |
| PFN1 cg10240449   | -0.004374691 | 0.669048292  |
| PFN1 cg13491759   | -0.004303678 | 0.377213354  |
| PFN1 cg16889556   | -0.003875099 | 0.3171113015 |
| PFN1 cg19752117   | -0.00078886  | 0.890814393  |
| PFN1 cg22114827   | -0.000519942 | 0.932674256  |
| PHF19 cg00045753  | 0.004752551  | 0.84598671   |
| PHF19 cg02388253  | -0.086928669 | 0.007494271  |
| PHF19 cg03808351  | 0.085864661  | 0.000110183  |
| PHF19 cg05834805  | 0.047524631  | 0.10298891   |
| PHF19 cg11054680  | -0.008235963 | 0.422050413  |
| PHF19 cg11594303  | 0.000702538  | 0.817671977  |
| PHF19 cg13419692  | -0.066216183 | 0.09342377   |
| PHF19 cg13501527  | -0.093611536 | 0.00715588   |
| PHF19 cg13793166  | 0.001208268  | 0.955709199  |
| PHF19 cg14218513  | -0.004119081 | 0.296814265  |
| PHF19 cg14425045  | 0.02880781   | 2.29039E-05  |
| PHF19 cg14543508  | 0.117569962  | 3.99575E-05  |
| PHF19 cg14614490  | -0.042483235 | 0.065994395  |
| PHF19 cg18224492  | -0.008288362 | 0.584698722  |
| PHF19 cg21179713  | 0.00553125   | 0.649375171  |
| PHPT1 cg07432438  | -0.003723654 | 0.211178416  |
| PHPT1 cg11185291  | -0.09980129  | 1.97391E-08  |
| PHPT1 cg11453712  | 0.091400095  | 0.000345683  |
| PHPT1 cg13639672  | -0.001025168 | 0.798088655  |
| PHPT1 cg13789711  | -0.003275908 | 0.349039466  |
| PHPT1 cg14162552  | -0.09313154  | 3.9229E-09   |
| PHPT1 cg14245947  | 0.067098169  | 0.037738147  |
| PHPT1 cg14290445  | -0.095098692 | 1.49041E-09  |
| PHPT1 cg16777839  | 0.000426245  | 0.939366137  |
| PHPT1 cg17963089  | -0.002024919 | 0.49256369   |
| PHPT1 cg27152619  | -0.003579007 | 0.515501009  |
| POL2RI cg01166180 | -0.003562909 | 0.213167025  |
| POL2RI cg05031283 | 0.002048525  | 0.732384669  |
| POL2RI cg07634150 | 0.000436256  | 0.947679599  |
| POL2RI cg12960866 | -0.007031812 | 0.14594924   |
| POL2RI cg13597949 | -0.007358199 | 0.17380891   |
| POL2RI cg19720917 | -0.000523387 | 0.96440634   |
| POL2RI cg22746529 | -0.043073981 | 0.050799547  |
| POL2RI cg25230235 | -0.001733039 | 0.572985349  |
| POL2RI cg26681081 |              |              |
| PPIA cg03041365   | -0.005746627 | 0.665039691  |
| PPIA cg06436997   | -0.008572248 | 0.05985705   |
| PPIA cg08300117   | -0.003686572 | 0.846533896  |
| PPIA cg08901752   | -0.001309651 | 0.502474881  |
| PPIA cg11056045   | 0.003307893  | 0.809989812  |
| PPIA cg12111272   | -0.001390399 | 0.585997822  |
| PPIA cg12342027   | -0.003524051 | 0.851889052  |

|                  |              |             |
|------------------|--------------|-------------|
| PPIA cg12520111  | -0.004792947 | 0.565510823 |
| PPIA cg14056620  | -0.005473368 | 0.269691926 |
| PPIA cg22024117  | -0.005690944 | 0.024621722 |
| PPIA cg25980157  | -0.001768459 | 0.675661252 |
| PPIA cg26194633  | 0.002423082  | 0.822710484 |
| PPIA cg26307266  | -0.00350834  | 0.403105815 |
| PRC1 cg01213445  | 0.001973146  | 0.886208602 |
| PRC1 cg01407062  | -0.09571187  | 1.43983E-05 |
| PRC1 cg03379200  | -0.00080231  | 0.915626227 |
| PRC1 cg04509607  | -0.007780053 | 0.293434612 |
| PRC1 cg05564953  | -0.000945651 | 0.934426149 |
| PRC1 cg06613755  | 0.001131336  | 0.889794207 |
| PRC1 cg09180926  | -0.001467136 | 0.833602227 |
| PRC1 cg12467864  | -0.000575444 | 0.834174682 |
| PRC1 cg12488346  | -0.002130637 | 0.728878479 |
| PRC1 cg14398957  | -0.069435842 | 0.028796887 |
| PRC1 cg14921757  | -0.004684107 | 0.769916209 |
| PRC1 cg15595742  | -0.002416426 | 0.570752609 |
| PRC1 cg15878949  | -0.00748588  | 0.557556487 |
| PRC1 cg23887623  | -0.008548859 | 0.432070892 |
| PRC1 cg24095889  | -0.002549874 | 0.826773224 |
| PRC1 cg25237056  | -0.002948206 | 0.351869138 |
| PRC1 cg25699121  | 0.000753014  | 0.953784985 |
| PRC1 cg26181196  | -0.004947834 | 0.759108585 |
| PRR24 cg00581979 | -0.007692817 | 0.713841582 |
| PRR24 cg02861966 | 0.001667653  | 0.795225205 |
| PRR24 cg05161930 | -0.001305357 | 0.927924268 |
| PRR24 cg06563149 | 0.005775326  | 0.699181531 |
| PRR24 cg09260634 | -0.045476927 | 2.76043E-06 |
| PRR24 cg11239220 | -0.001744841 | 0.873703849 |
| PRR24 cg11324538 | -0.042680829 | 0.000960966 |
| PRR24 cg11557938 | 0.001517689  | 0.863160255 |
| PRR24 cg12111432 | -0.001276567 | 0.863227032 |
| PRR24 cg16033376 | 0.003818691  | 0.56291242  |
| PRR24 cg17398851 | -0.004710473 | 0.696565478 |
| PRR24 cg17460200 | -0.000159226 | 0.972965054 |
| PRR24 cg20642610 | -0.002448853 | 0.646595279 |
| PRR24 cg25253217 | -0.002745045 | 0.813297884 |
| PSMA7 cg00071265 | -0.026689836 | 0.005129348 |
| PSMA7 cg01423077 | -0.004761902 | 0.347984811 |
| PSMA7 cg03416888 | 0.000103439  | 0.982175029 |
| PSMA7 cg04928513 | -0.002327855 | 0.686535221 |
| PSMA7 cg07864765 | -0.001396098 | 0.848308751 |
| PSMA7 cg08575399 | -0.006715363 | 0.201827362 |
| PSMA7 cg08833432 | -0.033122018 | 0.007456342 |
| PSMA7 cg11012980 | -0.002146582 | 0.782881676 |
| PSMA7 cg12800803 | -0.011473367 | 0.080225699 |
| PSMA7 cg13251669 | -0.001421906 | 0.673052798 |
| PSMA7 cg13475699 | -0.004095643 | 0.141316144 |

|                  |              |             |
|------------------|--------------|-------------|
| PSMA7 cg15580043 | 0.002982139  | 0.693007947 |
| PSMA7 cg17665883 | -0.07688481  | 0.000265645 |
| PSMA7 cg21803754 | -0.002319916 | 0.560702522 |
| PSMA7 cg24738006 | -0.003011904 | 0.364533881 |
| PSMB3 cg01970017 | 0.006660201  | 0.296476721 |
| PSMB3 cg03255265 | 0.00220154   | 0.803213353 |
| PSMB3 cg03394764 | -0.000213095 | 0.979120386 |
| PSMB3 cg04409945 | 0.002264622  | 0.363009554 |
| PSMB3 cg06027620 | -0.001642343 | 0.963330082 |
| PSMB3 cg07456797 | 0.000336282  | 0.968028697 |
| PSMB3 cg11349328 | 0.003402077  | 0.501268724 |
| PSMB3 cg13671121 | 0.006667595  | 0.563818399 |
| PSMB3 cg13824734 | 0.001301643  | 0.601459381 |
| PSMB3 cg16545499 | 0.001386975  | 0.851485124 |
| PSMB3 cg17215234 | 0.000488573  | 0.922034715 |
| PSMB3 cg22348431 | -0.000132112 | 0.977809585 |
| PSMB3 cg24866651 | -0.000145889 | 0.982893142 |
| PSMB3 cg27434072 | -0.002726495 | 0.640763302 |
| PSME2 cg00730794 | -0.001960838 | 0.510705111 |
| PSME2 cg00962125 | 0.001965214  | 0.889349887 |
| PSME2 cg05341425 | -0.003345124 | 0.662196871 |
| PSME2 cg05487736 | -0.004491155 | 0.158569153 |
| PSME2 cg10297165 | 0.001683233  | 0.739363885 |
| PSME2 cg10769343 | 0.001341655  | 0.887362049 |
| PSME2 cg12590010 | -0.003259057 | 0.405282841 |
| PSME2 cg13545642 | -0.003145618 | 0.874019795 |
| PSME2 cg21235874 | 0.002269462  | 0.620132983 |
| PSME2 cg23381116 | -0.003952714 | 0.315514282 |
| PSME2 cg23525241 | -0.002743504 | 0.732446347 |
| PTN cg00653387   | -0.00779363  | 0.001169717 |
| PTN cg01751605   | -0.004305499 | 0.454432267 |
| PTN cg02701024   | -0.040182321 | 0.346816994 |
| PTN cg03464514   | -0.004326692 | 0.578188483 |
| PTN cg03749900   | -0.002436931 | 0.868846958 |
| PTN cg06052255   | 0.012086583  | 0.567389641 |
| PTN cg06147210   | -0.070808867 | 0.000497978 |
| PTN cg06644721   | 0.012018475  | 0.087228545 |
| PTN cg06915773   | -0.001146188 | 0.751727318 |
| PTN cg08991965   | -0.058193392 | 0.033587269 |
| PTN cg11521965   | -0.00251003  | 0.661034041 |
| PTN cg11874123   | -0.000193607 | 0.954229459 |
| PTN cg11991398   | -0.049711124 | 0.128155439 |
| PTN cg15284177   | 0.024242647  | 0.633332235 |
| PTN cg16029260   | -0.085535133 | 1.64489E-10 |
| PTN cg18769353   | 0.002528002  | 0.610085132 |
| PTN cg22979093   | -0.006726401 | 0.356778869 |
| PTN cg23787144   | -0.004727371 | 0.852351471 |
| PTN cg26979473   | -0.003301068 | 0.795564527 |
| PTTG cg00116688  | 9.02462E-05  | 0.987516216 |

|                    |              |             |
|--------------------|--------------|-------------|
| PTTG cg09468767    | -0.000554664 | 0.929672367 |
| PTTG cg12430567    | -0.010862051 | 0.040035978 |
| PTTG cg15407784    | -0.027966392 | 0.027556116 |
| PTTG cg17367077    | -0.088118004 | 0.015549302 |
| PTTG cg19619065    | 0.000753471  | 0.949860885 |
| PTTG cg21784134    | -0.000938428 | 0.84271479  |
| PTTG cg23024444    | -0.043544315 | 0.004113073 |
| PTTG cg26775866    | -0.009352079 | 0.12289588  |
| PTTG cg27185377    | -0.004336613 | 0.466301047 |
| PXMP2 cg00630583   | -0.000289028 | 0.97202121  |
| PXMP2 cg01226748   | 0.028387141  | 0.431490069 |
| PXMP2 cg05508447   | -0.001746433 | 0.73304293  |
| PXMP2 cg08310608   | -0.082135874 | 0.000324593 |
| PXMP2 cg08829281   | 0.000727635  | 0.817061362 |
| PXMP2 cg11855524   | -0.101889875 | 0.001143824 |
| PXMP2 cg12755061   | -0.030237365 | 0.003826614 |
| PXMP2 cg16246698   | -0.006548794 | 0.5021923   |
| PXMP2 cg18877514   | -0.03747583  | 0.025080204 |
| PXMP2 cg21894028   | -0.020283495 | 0.142052674 |
| PXMP2 cg26271840   | -0.026539424 | 0.34111329  |
| RACGAP1 cg05863443 | 0.000755775  | 0.868740266 |
| RACGAP1 cg09631044 | -0.000310604 | 0.964794757 |
| RACGAP1 cg11079525 | -0.00279611  | 0.466771778 |
| RACGAP1 cg11203371 | -0.000741283 | 0.909350187 |
| RACGAP1 cg12556960 | -4.80786E-05 | 0.996288361 |
| RACGAP1 cg16210078 | -0.058052214 | 0.047800125 |
| RACGAP1 cg16614527 | -0.058375003 | 0.03526995  |
| RACGAP1 cg16935670 | 0.000285499  | 0.98852189  |
| RACGAP1 cg17434273 | 0.000537634  | 0.896175444 |
| RACGAP1 cg19339811 | -0.001078783 | 0.725435706 |
| RACGAP1 cg21161070 | 0.001340122  | 0.567447077 |
| RACGAP1 cg21660921 | 0.000158452  | 0.945606931 |
| RACGAP1 cg23517124 | -0.000892135 | 0.787465997 |
| RACGAP1 cg27159962 | -0.097287823 | 0.00137822  |
| RBX1 cg00585572    | -0.007375808 | 0.129694894 |
| RBX1 cg03160045    | -0.008712821 | 0.05199747  |
| RBX1 cg03614664    | -0.002141557 | 0.573555935 |
| RBX1 cg07288693    | -0.000537315 | 0.975994961 |
| RBX1 cg10781403    | -0.002099431 | 0.602575252 |
| RBX1 cg12338176    | -0.034716557 | 0.084619948 |
| RBX1 cg14789928    | 0.003859917  | 0.688547021 |
| RBX1 cg19850545    | -0.01072601  | 0.18286914  |
| RBX1 cg21454656    | -0.000517517 | 0.936588664 |
| RDX cg00626438     | -0.000302687 | 0.955301969 |
| RDX cg01015879     | 4.89598E-05  | 0.988650324 |
| RDX cg02243606     | -0.002929394 | 0.939200427 |
| RDX cg02535507     | -0.004270209 | 0.243826373 |
| RDX cg03141158     | 0.012962906  | 0.400090859 |
| RDX cg05842391     | -0.006056941 | 0.165670859 |

|                  |              |             |
|------------------|--------------|-------------|
| RDX cg08451637   | -0.007290238 | 0.80531917  |
| RDX cg08714586   | -0.000996411 | 0.876498102 |
| RDX cg09331704   | -0.000749271 | 0.950778594 |
| RDX cg09715738   | -0.004537061 | 0.434736529 |
| RDX cg11567172   | -0.000619245 | 0.893477997 |
| RDX cg15496005   | -0.000603268 | 0.91725892  |
| RDX cg15825059   | 0.040268952  | 0.246095455 |
| RDX cg17015511   | 0.001353235  | 0.839541875 |
| RDX cg19336191   | -0.041759483 | 0.017949399 |
| RDX cg23352579   | -0.004306617 | 0.425097872 |
| RDX cg24508561   | -0.001807883 | 0.733051365 |
| RDX cg25166381   | -0.002622114 | 0.620339116 |
| RDX cg25229114   | -0.003375666 | 0.527034893 |
| RDX cg25260114   | -0.006201693 | 0.652457367 |
| RDX cg26204042   | -0.034284648 | 0.025481577 |
| RRM2 cg00506866  | -0.006167815 | 0.17872413  |
| RRM2 cg02237186  | -0.001308896 | 0.867921496 |
| RRM2 cg04817183  | -0.005035096 | 0.531305438 |
| RRM2 cg05515713  | 0.000600769  | 0.855179009 |
| RRM2 cg07545636  | -0.000268138 | 0.962757853 |
| RRM2 cg15345369  | 0.000121906  | 0.993322196 |
| RRM2 cg17779456  | 0.000726974  | 0.943148374 |
| RRM2 cg18623836  | -0.046821053 | 0.041753232 |
| RRM2 cg18639038  | -5.17512E-05 | 0.987053976 |
| RRM2 cg19516340  | -0.034244126 | 0.005258017 |
| RRM2 cg24419094  | -0.117722479 | 0.004099107 |
| RRM2 cg26095266  | -0.004386487 | 0.69284761  |
| RRM2 cg27637048  | -0.037356338 | 0.02866202  |
| SGOL1 cg02114449 | -0.001459913 | 0.611894871 |
| SGOL1 cg02921887 | 0.002439789  | 0.758763378 |
| SGOL1 cg04951797 | 0.004702576  | 0.73820753  |
| SGOL1 cg11494149 | -0.004456842 | 0.209426312 |
| SGOL1 cg12185908 | 0.000632938  | 0.919705263 |
| SGOL1 cg12506980 | 0.002167238  | 0.650338756 |
| SGOL1 cg12930269 | -0.001682796 | 0.704382499 |
| SGOL1 cg12933903 | -0.033163325 | 0.001208155 |
| SGOL1 cg14339353 | 0.001086341  | 0.870535433 |
| SGOL1 cg16339185 | -0.00122314  | 0.628408126 |
| SGOL1 cg19823793 | 0.001085261  | 0.940927505 |
| SGOL1 cg21395120 | 0.000714107  | 0.881545946 |
| SGOL1 cg21745444 | -0.002472661 | 0.59337859  |
| SGOL1 cg21755440 | 0.000151684  | 0.979942691 |
| SGOL2 cg22240704 | 0.015204746  | 0.540971716 |
| SGOL2 cg22604940 | 0.000227758  | 0.971233364 |
| SGOL2 cg05409597 | -0.005130358 | 0.016197475 |
| SGOL2 cg08404560 | -0.001445401 | 0.576017865 |
| SGOL2 cg09018151 | -0.003336073 | 0.501616413 |
| SGOL2 cg10630197 | -0.002138938 | 0.905126074 |
| SGOL2 cg13718278 | -0.023994401 | 0.032141291 |

|                  |              |             |
|------------------|--------------|-------------|
| SGOL2 cg19235490 | -0.001052632 | 0.844892458 |
| SGOL2 cg24423567 | -0.00243609  | 0.556480602 |
| SGOL2 cg24930416 | 0.064192632  | 0.200698756 |
| SGOL2 cg25338577 | -0.004871073 | 0.068207147 |
| SGOL2 cg26742320 | 0.023421542  | 0.037113758 |
| SGOL2 cg26961824 | -0.012137251 | 0.644596358 |
| SGOL2 cg27400282 | -0.002476605 | 0.890004953 |
| SHD cg05891007   | -0.015465611 | 0.078950539 |
| SHD cg06065657   | -0.008887397 | 0.034080712 |
| SHD cg08852149   | 0.011774007  | 0.135483292 |
| SHD cg14200834   | -0.030150472 | 0.409557244 |
| SHD cg18581445   | -0.010907409 | 0.225025835 |
| SHD cg23296369   | -0.085539164 | 0.001780959 |
| SHD cg24408057   | -0.075539916 | 2.4252E-08  |
| SHD cg24830664   | -0.007722738 | 0.426306238 |
| SHD cg26646370   | -0.002909555 | 0.900342361 |
| SHMT2 cg01267941 | -0.002166658 | 0.590187683 |
| SHMT2 cg01763913 | -0.009213867 | 0.323103391 |
| SHMT2 cg02773601 | -0.001677592 | 0.788581702 |
| SHMT2 cg03052162 | 0.068692361  | 0.009875545 |
| SHMT2 cg06868473 | 0.055450003  | 0.057220821 |
| SHMT2 cg08163918 | -0.016688554 | 0.538140394 |
| SHMT2 cg09215553 | 0.000192005  | 0.975892126 |
| SHMT2 cg10952910 | 0.000843903  | 0.889706385 |
| SHMT2 cg11350278 | -0.006236902 | 0.498424268 |
| SHMT2 cg11851129 | -0.052886417 | 0.004918207 |
| SHMT2 cg12502815 | -0.004953497 | 0.500975568 |
| SHMT2 cg12639933 | -0.100566674 | 1.86223E-06 |
| SHMT2 cg12988522 | 0.012405142  | 0.595818998 |
| SHMT2 cg19535267 | 0.022812924  | 0.636525108 |
| SHMT2 cg19621579 | -0.000664401 | 0.916664821 |
| SHMT2 cg21549333 | -0.001229814 | 0.810073087 |
| SHMT2 cg21697007 | 0.004585065  | 0.391195525 |
| SHMT2 cg23588553 | -0.001122147 | 0.891081326 |
| SHMT2 cg25110782 | -0.058076942 | 0.002222182 |
| SHMT2 cg26220528 | 0.011178216  | 0.453696397 |
| SHMT2 cg27039453 | -0.010187551 | 0.238280958 |
| SIVA1 cg02825646 | 2.25378E-05  | 0.997404289 |
| SIVA1 cg08568075 | -0.001844093 | 0.567083764 |
| SIVA1 cg09315921 | -0.000301433 | 0.964881229 |
| SIVA1 cg10157936 | -0.009635274 | 0.747793039 |
| SIVA1 cg10285897 | -0.001882321 | 0.659839597 |
| SIVA1 cg13109045 | -0.003575712 | 0.359869304 |
| SIVA1 cg14043411 | -0.000819457 | 0.836827982 |
| SIVA1 cg14235723 | -0.001338883 | 0.887687355 |
| SIVA1 cg19495714 | 0.028434133  | 0.304765082 |
| SIVA1 cg20257916 | -0.000706654 | 0.890371001 |
| SIVA1 cg22864355 | -0.096397359 | 2.71545E-06 |
| SIVA1 cg26953093 | -0.00314696  | 0.716494407 |

|                    |              |             |
|--------------------|--------------|-------------|
| SLC25A5 cg01325409 |              |             |
| SLC25A5 cg01497576 |              |             |
| SLC25A5 cg04643655 |              |             |
| SLC25A5 cg08411738 |              |             |
| SLC25A5 cg09456905 |              |             |
| SLC25A5 cg09625274 |              |             |
| SLC25A5 cg13223777 |              |             |
| SLC25A5 cg18242760 |              |             |
| SLC25A5 cg18585464 |              |             |
| SLC25A5 cg19409156 |              |             |
| SLC25A5 cg24125468 |              |             |
| SMC4 cg04212239    | 0.004066375  | 0.765948237 |
| SMC4 cg04479354    | 0.001931353  | 0.794447709 |
| SMC4 cg09100593    | -0.039071974 | 0.240841578 |
| SMC4 cg12785694    | 0.001065535  | 0.970010931 |
| SMC4 cg13783238    | 0.015830468  | 0.680120638 |
| SMC4 cg15174463    | 0.003827573  | 0.522874011 |
| SMC4 cg16053434    | 0.003740398  | 0.481006992 |
| SMC4 cg16978263    | -0.001282687 | 0.818596926 |
| SMC4 cg17472985    | 0.006123224  | 0.610916909 |
| SMC4 cg17554896    | -0.07893183  | 0.014917164 |
| SMC4 cg21508214    | -0.001150627 | 0.772552977 |
| SMC4 cg21710313    | 0.002136785  | 0.544450931 |
| SMC4 cg22668533    | 0.000515939  | 0.895309217 |
| SMC4 cg25007351    | 0.002060766  | 0.595444328 |
| SOCS3 cg01897823   | -0.004035227 | 0.286287327 |
| SOCS3 cg03752138   | -0.056290619 | 0.003729487 |
| SOCS3 cg04548563   | 0.012866231  | 0.061094463 |
| SOCS3 cg05761277   | -0.004217315 | 0.514574461 |
| SOCS3 cg10279487   | -0.042696328 | 0.340406135 |
| SOCS3 cg10508317   | -0.033505995 | 0.461780999 |
| SOCS3 cg14721618   | 0.004796409  | 0.475787191 |
| SOCS3 cg15502888   | -0.007028528 | 0.184118101 |
| SOCS3 cg18181703   | 0.000248965  | 0.995695141 |
| SOCS3 cg19894975   | -0.000695279 | 0.986319009 |
| SOCS3 cg21500342   | 0.001711148  | 0.680072811 |
| SOCS3 cg21985352   | -0.001439099 | 0.89990726  |
| SOCS3 cg22749855   | 0.055854264  | 0.043970203 |
| SOCS3 cg23985214   | -0.007146746 | 0.336154852 |
| SOCS3 cg26998429   | -0.000841962 | 0.89857009  |
| SOCS3 cg27637521   | -0.054856217 | 0.238836582 |
| SOX4 cg00792966    | -0.003317747 | 0.529651686 |
| SOX4 cg02301209    | -0.010270451 | 0.417110696 |
| SOX4 cg03203320    | -0.016097851 | 0.414278758 |
| SOX4 cg05281544    | -0.001482084 | 0.783627765 |
| SOX4 cg06170053    | 0.000535503  | 0.933379058 |
| SOX4 cg06512858    | -0.002949361 | 0.610120475 |
| SOX4 cg08625851    | 0.000108036  | 0.986642313 |
| SOX4 cg08718230    | -0.001104462 | 0.737058287 |



|                  |              |             |
|------------------|--------------|-------------|
| SOX4 cg08950757  | 0.000279207  | 0.960643182 |
| SOX4 cg13995516  | -0.006119653 | 0.443819753 |
| SOX4 cg14499797  | 0.000391451  | 0.91510406  |
| SOX4 cg22274825  | 0.000760528  | 0.920325229 |
| SOX4 cg22671938  | -0.003567867 | 0.25051621  |
| SOX4 cg23148651  | -0.010250212 | 0.300054297 |
| SOX4 cg23345561  | -0.004546312 | 0.77548768  |
| SOX4 cg23780597  | 0.001141856  | 0.683618867 |
| SOX4 cg24249751  | -0.00266717  | 0.79348016  |
| SPARC cg06571753 | 0.016948425  | 0.405622748 |
| SPARC cg07539983 | 0.009833555  | 0.20287581  |
| SPARC cg08331313 | 0.006983211  | 0.547550201 |
| SPARC cg08879559 | 0.001187909  | 0.948395054 |
| SPARC cg10505630 | 0.046144369  | 0.026581908 |
| SPARC            | 0.023453285  | 0.378371954 |
| SPARC cg21877464 | 0.037619975  | 0.099033459 |
| SPARC cg22116670 | 0.008098379  | 0.542380954 |
| SPARC cg23174201 | 0.009249012  | 0.769903638 |
| SPARC cg25587069 | 0.01226501   | 0.43646145  |
| SPARC cg25913233 | -0.000495897 | 0.966907016 |
| SPARC cg26389330 | 0.120265818  | 1.96782E-10 |
| SPARC cg27128761 | 0.095516492  | 6.03983E-06 |
| SPC25 cg04949346 | -0.010509029 | 0.295258009 |
| SPC25 cg05868191 | -0.00680138  | 0.816136716 |
| SPC25 cg06350524 | 0.003872141  | 0.535673466 |
| SPC25 cg06580318 | -0.001941733 | 0.729339846 |
| SPC25 cg06971765 | -0.00209817  | 0.82949881  |
| SPC25 cg07224215 | -0.001744885 | 0.847678222 |
| SPC25 cg13605690 | -0.002508198 | 0.348162036 |
| SPC25 cg14465028 | -0.000860548 | 0.890170959 |
| SPC25 cg15237047 | 0.000832231  | 0.804506807 |
| SPC25 cg17942426 | -0.004688825 | 0.412153002 |
| SPC25 cg20609092 | -0.003583585 | 0.800946177 |
| SPC25 cg22278106 | -0.003810676 | 0.394364972 |
| SSBP4 cg00751072 | 0.020942699  | 0.406136165 |
| SSBP4 cg01450303 | 0.015287496  | 0.628639104 |
| SSBP4 cg01532080 | -0.012193623 | 0.400117474 |
| SSBP4 cg07527607 | -0.051147027 | 0.022528665 |
| SSBP4 cg07561894 | -0.0137502   | 0.23043797  |
| SSBP4 cg09516349 | -0.027233084 | 0.317859629 |
| SSBP4 cg09529667 | -0.000291205 | 0.991000797 |
| SSBP4 cg10790698 | -0.009817519 | 0.121546759 |
| SSBP4 cg11778563 | 0.030775687  | 0.446243329 |
| SSBP4 cg13331354 | -0.007659584 | 0.571008278 |
| SSBP4 cg18362448 | 0.015056065  | 0.626007041 |
| SSBP4 cg18547371 | 0.003206277  | 0.796110202 |
| SSBP4 cg20556517 | -0.006572787 | 0.489234953 |
| SSBP4 cg23544107 | -0.061665028 | 0.0265316   |
| SSBP4 cg25902939 | -0.021986298 | 0.535949298 |

|                   |              |             |
|-------------------|--------------|-------------|
| STK17A cg03345106 | -0.002476171 | 0.520352598 |
| STK17A cg05415936 | -0.029336435 | 0.06430613  |
| STK17A cg11022926 | -0.056769345 | 4.02884E-07 |
| STK17A cg14426688 | -0.002541561 | 0.702257808 |
| STK17A cg17568409 | -0.002936729 | 0.473035038 |
| STK17A cg17707057 | 0.047309111  | 0.070886862 |
| STK17A cg18552620 | -0.001510962 | 0.745824433 |
| STK17A cg21309049 | -0.000828784 | 0.832601433 |
| STK17A cg22243438 | -0.002885644 | 0.553407625 |
| STK17A cg23213696 | 0.000319623  | 0.955116451 |
| STK17A cg23281417 | -0.000253973 | 0.949927604 |
| STK17A cg23785719 | 0.002199311  | 0.827969174 |
| TAGLN2 cg03138854 | -0.002509391 | 0.340952047 |
| TAGLN2 cg03651478 | 0.023628565  | 0.000331796 |
| TAGLN2 cg04116858 | -0.000180445 | 0.972047766 |
| TAGLN2 cg04130057 | 8.54816E-05  | 0.987087946 |
| TAGLN2 cg06992027 | 0.000444448  | 0.899381207 |
| TAGLN2 cg08661227 | -0.003310556 | 0.226839825 |
| TAGLN2 cg13562386 | 0.007168584  | 0.107894381 |
| TAGLN2 cg13892570 | 0.181616732  | 1.05798E-08 |
| TAGLN2 cg14086160 | 0.003960394  | 0.464183046 |
| TAGLN2 cg14633426 | 0.002868116  | 0.309457498 |
| TAGLN2 cg15641364 | 0.076473039  | 0.005388275 |
| TAGLN2 cg16107628 | 0.19708992   | 2.15679E-10 |
| TAGLN2 cg18763326 | 0.0002488    | 0.937803477 |
| TAGLN2 cg21571466 | 0.028011736  | 0.004872439 |
| TAGLN2 cg22339338 | 0.007561217  | 0.862871593 |
| TAGLN2 cg22698489 | 0.077742049  | 5.54162E-06 |
| TAGLN2 cg26546310 | -0.007885274 | 0.601611886 |
| TCF12 cg00016066  | 0.00025161   | 0.975729232 |
| TCF12 cg00027650  | -0.047007001 | 0.003219629 |
| TCF12 cg01778974  | -0.051491483 | 0.006985117 |
| TCF12 cg02734001  | -0.108488327 | 4.12148E-07 |
| TCF12 cg03237845  | -0.043426564 | 0.143409504 |
| TCF12 cg03334076  | -0.02679156  | 0.000402586 |
| TCF12 cg04858164  | -0.067438395 | 0.043236877 |
| TCF12 cg05141289  | -0.009048542 | 0.683811166 |
| TCF12 cg05359518  | -0.082246432 | 0.000446428 |
| TCF12 cg07046007  | -0.003777442 | 0.566068861 |
| TCF12 cg07276338  | -0.055430442 | 0.004454318 |
| TCF12 cg07769332  | -0.00251231  | 0.640142517 |
| TCF12 cg08128148  | -0.021411525 | 0.085997083 |
| TCF12 cg09989727  | -0.125656989 | 1.42561E-06 |
| TCF12 cg10146710  | 0.003330191  | 0.379113941 |
| TCF12 cg11289748  | -0.013934463 | 0.0156288   |
| TCF12 cg12426141  | -0.004437697 | 0.477493936 |
| TCF12 cg12637615  | -0.095602945 | 6.03576E-06 |
| TCF12 cg13033086  | 0.007923324  | 0.663227263 |
| TCF12 cg13165992  | -0.032179063 | 0.021794762 |

|                     |              |             |
|---------------------|--------------|-------------|
| TCF12 cg14303079    | 0.005711284  | 0.733275688 |
| TCF12 cg14507132    | -0.006046784 | 0.648295281 |
| TCF12 cg15085879    | -0.001674565 | 0.758331351 |
| TCF12 cg16458838    | -0.019541999 | 0.224550448 |
| TCF12 cg16515457    | -0.105685341 | 0.000663444 |
| TCF12 cg17140034    | -0.00421442  | 0.89378305  |
| TCF12 cg17396978    | -0.004427684 | 0.625191793 |
| TCF12 cg17883068    | 0.06951655   | 0.06724018  |
| TCF12 cg18117669    | -0.045000254 | 0.009651302 |
| TCF12 cg20555018    | -0.042817133 | 0.002766715 |
| TCF12 cg21831937    | -0.111221918 | 0.000356867 |
| TCF12 cg22677180    | -0.005053422 | 0.741736218 |
| TCF12 cg24079727    | 0.09098571   | 0.000653927 |
| TCF12 cg24492778    | 0.09231839   | 2.39842E-06 |
| TCF12 cg24783019    | -0.029380572 | 0.023952049 |
| TCF12 cg24784129    | -0.089127163 | 0.00033813  |
| TCF12 cg25005357    | -0.131626829 | 1.25605E-08 |
| TCF12 cg25688583    | -0.035582894 | 0.049464811 |
| TCF12 cg25707951    | -0.070870985 | 0.053481617 |
| TCF12 cg26810157    | -0.05144906  | 0.198614371 |
| TCF12 cg27119612    | -0.114243922 | 2.25055E-11 |
| TCTEX1D2 cg00961292 | -0.005310097 | 0.750961973 |
| TCTEX1D2 cg01915044 | -9.17495E-05 | 0.976129682 |
| TCTEX1D2 cg02026253 | -0.006955443 | 0.097787335 |
| TCTEX1D2 cg04887335 | -0.018726701 | 0.274234093 |
| TCTEX1D2 cg10336858 | -0.006107869 | 0.559812952 |
| TCTEX1D2 cg14465410 | -0.023382649 | 0.354596659 |
| TCTEX1D2 cg15268007 | -0.001060051 | 0.732880131 |
| TCTEX1D2 cg19600391 | -0.000482962 | 0.938263798 |
| TCTEX1D2 cg22505907 | -0.048461628 | 0.039162609 |
| TCTEX1D2 cg22624966 | -0.005364519 | 0.38086105  |
| TECR cg01542019     | -0.053347889 | 6.17768E-06 |
| TECR cg02644301     | -0.001591312 | 0.530304186 |
| TECR cg03162410     | 0.008673207  | 0.829611575 |
| TECR cg03205495     | -0.003284567 | 0.320608309 |
| TECR cg04387237     | -0.000626025 | 0.878994648 |
| TECR cg06893491     | -0.007668065 | 0.868461402 |
| TECR cg08345979     | -0.001345503 | 0.854942043 |
| TECR cg08434594     | -0.002092365 | 0.822406876 |
| TECR cg10007692     | -0.001836249 | 0.626665557 |
| TECR cg13237829     | 0.001941892  | 0.620920638 |
| TECR cg14339287     | -0.002014582 | 0.770146742 |
| TECR cg14898306     | 0.000132254  | 0.970975522 |
| TECR cg15649193     | -0.000854294 | 0.895374723 |
| TECR cg15697902     | -0.027676775 | 0.127744005 |
| TECR cg15939937     | -0.020607324 | 0.284734041 |
| TECR cg16860821     | 0.003302685  | 0.922626025 |
| TECR cg19263877     | -0.010868024 | 0.019462249 |
| TECR cg20630207     | -0.006042411 | 0.450973668 |

|                      |              |             |
|----------------------|--------------|-------------|
| TECR cg21511523      | 0.005015672  | 0.755373202 |
| TECR cg23470272      | -0.000232431 | 0.989656745 |
| TECR cg23690893      | 0.013615943  | 0.669225435 |
| TECR cg24143196      | -0.093156921 | 0.0016585   |
| TECR cg25685510      | 0.001286146  | 0.965534777 |
| TK1 cg00715343       | -0.020259293 | 0.014589528 |
| TK1cg03291825        | -0.016120323 | 0.688189135 |
| TK1cg06098276        | -0.090405141 | 0.00527884  |
| TK1cg08115732        | -0.107773914 | 9.81913E-09 |
| TK1cg18767057        | 0.026200687  | 0.099786847 |
| TK1cg20104688        | 0.000928909  | 0.824572655 |
| TK1cg20740903        | 0.000780337  | 0.984833006 |
| TK1cg21519872        | -0.046391806 | 0.030479931 |
| TK1cg25069807        | -0.069749509 | 0.017842129 |
| TK1cg26206461        | -0.015096712 | 0.248538998 |
| TMEM147 cg02035330   | -0.001266886 | 0.825694531 |
| TMEM147 cg05815685   | 0.000973966  | 0.939154027 |
| TMEM147 cg08480906   | -0.002647525 | 0.285971417 |
| TMEM147 cg13869971   | -0.001437063 | 0.775706911 |
| TMEM147 cg19016517   | -0.001775323 | 0.756619457 |
| TMEM147 cg24080181   | -0.002341937 | 0.362515323 |
| TMEM54 cg06179485    | -0.001294564 | 0.966831275 |
| TMEM54 cg12598340    | -0.02500381  | 0.444454094 |
| TMEM54 cg15626665    | -0.013060207 | 0.07657892  |
| TMEM54 cg15999547    | -0.025837167 | 0.033267018 |
| TMEM54 cg17832212    | -0.011983352 | 0.273051056 |
| TNFRSF12A cg00510447 | 0.022112147  | 0.002092033 |
| TNFRSF12A cg06097320 | 0.002804788  | 0.639740862 |
| TNFRSF12A cg06209210 | -0.000503523 | 0.939750298 |
| TNFRSF12A cg08798492 | 0.008415637  | 0.502908795 |
| TNFRSF12A cg15460516 | 0.002982906  | 0.670762198 |
| TNFRSF12A cg20195987 | 0.000287644  | 0.95957928  |
| TNFRSF12A cg26808293 | 0.007411615  | 0.255709844 |
| TNK2 cg00190795      | -0.061130224 | 2.54813E-06 |
| TNK2 cg00359285      | -0.048711405 | 0.004097883 |
| TNK2 cg00514684      | -0.005493314 | 0.604352193 |
| TNK2 cg00544413      | -0.00403224  | 0.444945453 |
| TNK2 cg00651401      | -0.011165611 | 0.692054494 |
| TNK2 cg01006102      | -0.106323158 | 3.68967E-10 |
| TNK2 cg01766844      | -0.006800507 | 0.68827686  |
| TNK2 cg01792640      | -0.040106261 | 0.041718847 |
| TNK2 cg01962086      | 0.009081484  | 0.821193831 |
| TNK2 cg02584969      | 0.000533409  | 0.948239105 |
| TNK2 cg02633073      | -0.000954543 | 0.835833665 |
| TNK2 cg02920514      | -0.02729491  | 0.000106188 |
| TNK2 cg03207310      | 0.00022137   | 0.958670313 |
| TNK2 cg03421964      | -0.078177259 | 0.001225405 |
| TNK2 cg04056669      | -0.136411288 | 4.00681E-06 |
| TNK2 cg04214520      | -0.168729498 | 1.09713E-08 |

|                  |              |             |
|------------------|--------------|-------------|
| TNK2 cg04848502  | -0.002929187 | 0.538874209 |
| TNK2 cg05064121  | 0.000628642  | 0.953250018 |
| TNK2 cg05802478  | -0.031913608 | 0.045415113 |
| TNK2 cg08048178  | -0.007409729 | 0.751990649 |
| TNK2 cg08119325  | -0.080798979 | 2.1754E-07  |
| TNK2 cg09459146  | -0.007673814 | 0.293959213 |
| TNK2 cg09628877  | -0.137923154 | 1.77347E-07 |
| TNK2 cg10542362  | 0.012810328  | 0.406682192 |
| TNK2 cg10843210  | -0.11729846  | 1.0641E-05  |
| TNK2 cg11095099  | -0.011070979 | 0.574101954 |
| TNK2 cg11150667  | -0.025096219 | 0.00343181  |
| TNK2 cg14030878  | -0.173524962 | 2.01481E-12 |
| TNK2 cg15010544  | -0.121592488 | 0.000101083 |
| TNK2 cg15065340  | 0.041088773  | 0.179249469 |
| TNK2 cg15854365  | -0.168846021 | 2.04678E-13 |
| TNK2 cg16047223  | -0.006610901 | 0.036584579 |
| TNK2 cg16229161  | -0.188705417 | 1.47995E-08 |
| TNK2 cg16568314  | -0.001867909 | 0.897497339 |
| TNK2 cg16615155  | -0.036904665 | 0.006346653 |
| TNK2 cg16929775  | -0.178654346 | 7.01504E-08 |
| TNK2 cg17640485  | -0.046303367 | 3.85393E-05 |
| TNK2 cg17663253  | -0.000599098 | 0.946675374 |
| TNK2 cg17913255  | -0.033196849 | 0.07605596  |
| TNK2 cg18473978  | -0.190388755 | 9.58394E-10 |
| TNK2 cg18716096  | -0.004016162 | 0.327401421 |
| TNK2 cg18783792  | -0.146392072 | 2.68767E-08 |
| TNK2 cg19955173  | 0.018990703  | 0.595171658 |
| TNK2 cg20697427  | -0.038118961 | 0.000255407 |
| TNK2 cg21008828  | -0.011264788 | 0.3841559   |
| TNK2 cg21425003  | -0.008578455 | 0.040694025 |
| TNK2 cg21438160  | -0.178383496 | 5.09006E-08 |
| TNK2 cg21553700  | -0.146573678 | 5.82696E-07 |
| TNK2 cg21642245  | -0.022854731 | 0.498581368 |
| TNK2 cg22558522  | -0.00760024  | 0.432008359 |
| TNK2 cg22762745  | -0.005794011 | 0.546728661 |
| TNK2 cg22809023  | -0.004398861 | 0.487658159 |
| TNK2 cg23258717  | -0.215520077 | 2.60362E-09 |
| TNK2 cg23548201  | -0.071821666 | 3.74144E-07 |
| TNK2 cg25152312  | -0.023244641 | 0.21347456  |
| TNK2 cg26033513  | -0.029460455 | 0.000149838 |
| TNK2 cg26686927  | -0.025775023 | 0.073977204 |
| TNK2 cg27228383  | -0.194731824 | 4.54764E-09 |
| TNK2 cg27418204  | -0.179627514 | 7.93651E-13 |
| TOP2A cg03359285 | -0.000672003 | 0.929632502 |
| TOP2A cg05120042 | -0.10138251  | 2.5625E-07  |
| TOP2A cg07388903 | -0.006378789 | 0.367121503 |
| TOP2A cg08817965 | 0.005114994  | 0.362758221 |
| TOP2A cg09273772 | -0.007258098 | 0.226391671 |
| TOP2A cg11393025 | -0.002559838 | 0.573079574 |

|                   |              |             |
|-------------------|--------------|-------------|
| TOP2A cg14572634  | -0.005116706 | 0.631804697 |
| TOP2A cg15769921  | 0.002515295  | 0.712396225 |
| TOP2A cg15797971  | -0.002138725 | 0.719153243 |
| TOP2A cg17504397  | -0.007435752 | 0.210600379 |
| TOP2A cg18314885  | -0.015910659 | 0.482184682 |
| TOP2A cg18998002  | -0.010223815 | 0.019185391 |
| TOP2A cg21499137  | -0.003732112 | 0.49566176  |
| TOP2A cg22912359  | 0.002262465  | 0.708417322 |
| TOP2A cg22935319  | -0.009527393 | 0.716152695 |
| TOP2A cg25450986  | 0.001999006  | 0.637807239 |
| TOP2A cg25581784  | -0.000567742 | 0.934216475 |
| TOP2A cg26007540  | -0.000270011 | 0.971999321 |
| TOP2A cg26134124  | -0.0013694   | 0.762735761 |
| TOP2A cg26164164  | -0.003281394 | 0.571369853 |
| TPI1 cg01213014   | -0.001707674 | 0.733434564 |
| TPI1 cg01441359   | 0.001739447  | 0.476180988 |
| TPI1 cg01607849   | 0.001095247  | 0.934799372 |
| TPI1 cg03067226   | -0.000838988 | 0.811596865 |
| TPI1 cg03737815   | 0.001920024  | 0.466364648 |
| TPI1 cg09357135   | -0.000275248 | 0.948975372 |
| TPI1 cg10471644   | -0.002280429 | 0.481887744 |
| TPI1 cg11021764   | 0.001639567  | 0.644489355 |
| TPI1 cg15325042   | -0.053028257 | 0.037242128 |
| TPI1 cg16426148   | 0.00011043   | 0.990952236 |
| TPI1 cg17184604   | -0.006187525 | 0.394136373 |
| TPI1 cg24555065   | -0.003038606 | 0.184047202 |
| TPI1 cg24672547   | 0.001906723  | 0.616815513 |
| TPI1 cg26269324   | -0.001375587 | 0.690209302 |
| TPI1 cg26276120   | -0.011565609 | 0.092281407 |
| TPX2 cg02256410   | -0.002343412 | 0.689561827 |
| TPX2 cg03352975   | -0.004472727 | 0.65512378  |
| TPX2 cg09863659   | 0.001751269  | 0.777519834 |
| TPX2 cg09877164   | -0.000274423 | 0.931601603 |
| TPX2 cg10476558   | -0.00278693  | 0.531772763 |
| TPX2 cg10480038   | -0.001332406 | 0.731129004 |
| TPX2 cg14326210   | -0.008256771 | 0.405689556 |
| TPX2 cg14878016   | -0.000310429 | 0.931558288 |
| TPX2 cg16338822   | -0.000368536 | 0.933173313 |
| TPX2 cg21838233   | -0.000270194 | 0.94419613  |
| TPX2 cg23807894   | -0.001684879 | 0.933552529 |
| TPX2 cg25649779   | 0.000112887  | 0.987236418 |
| TPX2 cg26820641   | 0.001809107  | 0.673487897 |
| TUBA1B cg00973724 | -0.004478138 | 0.412792404 |
| TUBA1B cg02084811 | -0.001659346 | 0.693780426 |
| TUBA1B cg02585102 | 0.000756878  | 0.955223489 |
| TUBA1B cg07420135 | -0.001419514 | 0.649529135 |
| TUBA1B cg11220397 | -0.004479151 | 0.659146748 |
| TUBA1B cg13709639 | -0.009671089 | 0.573518744 |
| TUBA1B cg14217534 | -0.001788119 | 0.535224182 |

|                   |              |             |
|-------------------|--------------|-------------|
| TUBA1B cg14483935 | -0.083949679 | 1.81404E-06 |
| TUBA1B cg16975985 | 0.001446301  | 0.900647336 |
| TUBA1B cg18239763 | 0.004098542  | 0.482810991 |
| TUBA1B cg19676328 | 0.00188401   | 0.762737979 |
| TUBA1B cg21300561 | 0.001730855  | 0.713841582 |
| TUBA1C cg21681289 | 5.16347E-05  | 0.986739652 |
| TUBA1C cg23702657 | -0.001738267 | 0.736037263 |
| TUBA1C cg01418856 | -0.000392645 | 0.97673317  |
| TUBA1C cg01581974 | 0.000457713  | 0.971342896 |
| TUBA1C cg02269388 | 0.001729706  | 0.920619524 |
| TUBA1C cg04797936 | 0.045345514  | 0.002372239 |
| TUBA1C cg15929573 | 0.003679786  | 0.717935584 |
| TUBA1C cg16881676 | 0.204447898  | 8.68423E-11 |
| TUBA1C cg17359076 | 0.000126141  | 0.985980643 |
| TUBA1C cg19426128 | -0.001563018 | 0.962778771 |
| TUBA1C cg24296900 | -0.000981302 | 0.964930317 |
| TUBA1C cg25751371 | 0.023711132  | 0.106947579 |
| TUBA1C cg27632435 | -0.006814897 | 0.641596559 |
| TUBB2A cg00231644 | -0.001711449 | 0.92594018  |
| TUBB2A cg13626842 | -0.004112912 | 0.12990116  |
| TUBB2A cg14462067 | -0.006899902 | 0.223846596 |
| TUBB2A cg15173079 | -0.047227837 | 0.095268292 |
| TUBB2A cg18049569 | -0.013729606 | 0.29936445  |
| TUBB2A cg21102926 | -0.002664386 | 0.380876292 |
| TUBB2A cg21526654 | -0.003514565 | 0.318345589 |
| TUBB2A cg22943782 | 0.000878386  | 0.869640206 |
| TUBB2A cg24306277 | -0.000348022 | 0.910515624 |
| TUBB2A cg25433222 | -0.031532404 | 0.194624748 |
| TUBB2A cg27530015 | -0.008541466 | 0.285154204 |
| TUBB6 cg03507241  | 0.011703165  | 0.862968078 |
| TUBB6 cg07307078  | 0.032675157  | 0.521993328 |
| TUBB6 cg12879381  | -0.003983138 | 0.740076149 |
| TUBB6 cg16546503  | -0.014768794 | 0.820314603 |
| TUBB6 cg16808455  | 0.008704528  | 0.839577624 |
| TUBB6 cg18348731  | -0.004203778 | 0.841901267 |
| TUBB6 cg22467216  | -0.004298219 | 0.933962681 |
| TUBB6 cg25836232  | -0.052327969 | 0.100726406 |
| UBE2C cg00242976  | -0.025542855 | 0.004671881 |
| UBE2C cg01661001  | 0.003024313  | 0.790363732 |
| UBE2C cg02405476  | -0.00921177  | 0.079698802 |
| UBE2C cg02838589  | -0.021444871 | 0.483910617 |
| UBE2C cg03843031  | -0.002388054 | 0.553379205 |
| UBE2C cg03969725  | -0.061161075 | 2.69928E-06 |
| UBE2C cg10985576  | -0.006377151 | 0.507224609 |
| UBE2C cg12354270  | -0.002081119 | 0.545457154 |
| UBE2C cg13736875  | 0.000828364  | 0.854473813 |
| UBE2C cg13853156  | -0.003097949 | 0.647118436 |
| UBE2C cg18038749  | -0.001959578 | 0.688238776 |
| UBE2C cg19197419  | -0.008451887 | 0.226464987 |

|                  |              |             |
|------------------|--------------|-------------|
| UBE2C cg19222480 | -0.002507863 | 0.489625108 |
| UBE2C cg20034785 | -0.00358848  | 0.55925416  |
| UBE2C cg22082347 | 0.000187043  | 0.976522034 |
| UBE2C cg22431438 | -0.000208584 | 0.969844954 |
| UBE2C cg23265604 | -0.002307152 | 0.707904808 |
| UBE2C cg23873448 | -0.001148107 | 0.66528623  |
| UBE2C cg24675094 | -0.000591442 | 0.854354851 |
| UBE2T cg01918706 | -0.002084691 | 0.665148867 |
| UBE2T cg02926368 | -0.003742681 | 0.327884078 |
| UBE2T cg11819639 | -0.0045249   | 0.326405863 |
| UBE2T cg13395333 | -0.000636952 | 0.93045077  |
| UBE2T cg15173196 | -0.003289048 | 0.417333337 |
| UBE2T cg16993579 | 0.0022868    | 0.890038798 |
| UBE2T cg26399396 | -0.004033196 | 0.458303963 |
| UQCC cg04149172  | -0.026995035 | 0.267938881 |
| UQCC cg05298461  | 0.000840924  | 0.814671214 |
| UQCC cg05389922  | -0.007961795 | 0.708525986 |
| UQCC cg08152058  | -0.00185359  | 0.617978269 |
| UQCC cg11281845  | -0.00085207  | 0.809949206 |
| UQCC cg12277998  | 0.002145988  | 0.774518977 |
| UQCC cg12522898  | -0.002019637 | 0.713865902 |
| UQCC cg14752227  | 0.001371985  | 0.97508001  |
| UQCC cg17046996  | -0.000737955 | 0.954632857 |
| UQCC cg20564458  | 0.000968684  | 0.852057795 |
| UQCC cg24906992  | -0.002558769 | 0.459924047 |
| UQCC cg26475306  | -0.001338521 | 0.781376833 |
| UQCR cg01094684  | 0.000412856  | 0.928771629 |
| UQCR cg01608030  | -0.008861061 | 0.198468357 |
| UQCR cg04156970  | -1.74506E-05 | 0.997868503 |
| UQCR cg04600406  | -0.005211219 | 0.368473335 |
| UQCR cg05219517  | -0.005164884 | 0.214261539 |
| UQCR cg10643550  | 0.039072667  | 0.139605858 |
| UQCR cg11792664  | -0.001677648 | 0.800624949 |
| UQCR cg12235988  | 0.001344259  | 0.708077801 |
| UQCR cg15696376  | 0.000470725  | 0.887753194 |
| UQCR cg15974216  | -0.004168428 | 0.784311598 |
| UQCR cg22625420  | -0.002191811 | 0.68376972  |
| UQCR cg26571977  | -0.006740276 | 0.361853805 |
| UQCR cg26885578  | -0.003143719 | 0.376013028 |
| VIM cg00146951   | 0.001749894  | 0.59666091  |
| VIM cg01003015   | 0.011687476  | 0.386677624 |
| VIM cg01154046   | -0.000397914 | 0.952343447 |
| VIM cg02236650   | 0.047275817  | 0.031720108 |
| VIM cg02746869   | -0.000574293 | 0.962457038 |
| VIM cg05151811   | 0.000304423  | 0.970996454 |
| VIM cg06460869   | 0.002416117  | 0.717523548 |
| VIM cg08918274   | 0.006742789  | 0.043627408 |
| VIM cg11973177   | 0.00077578   | 0.9525822   |
| VIM cg12155165   | 0.002579614  | 0.620079135 |



|                  |              |             |
|------------------|--------------|-------------|
| VIM cg12874092   | -0.000101914 | 0.971833113 |
| VIM cg13414916   | -0.000201    | 0.952370325 |
| VIM cg14260889   | 0.111397557  | 0.006415222 |
| VIM cg14898116   | 0.010436576  | 0.623114328 |
| VIM cg15363487   | -0.000165692 | 0.988112765 |
| VIM cg18514820   | 0.008665773  | 0.122465337 |
| VIM cg19111999   | 0.017864288  | 0.005360718 |
| VIM cg19170009   | 0.088135829  | 0.009152949 |
| VIM cg20018469   | 0.00575962   | 0.308580289 |
| VIM cg20198108   | 0.002972843  | 0.681250104 |
| VIM cg20319091   | -5.14925E-05 | 0.992246665 |
| VIM cg23821329   | 0.048213006  | 0.00026877  |
| VIM cg23912429   | -0.000985823 | 0.867548989 |
| VIM cg23991622   | -0.006518866 | 0.491787833 |
| VIM cg26063719   | 7.17121E-05  | 0.996403506 |
| VIM cg26306372   | -0.000523198 | 0.953992565 |
| VIM cg26983469   | 0.001128359  | 0.905054189 |
| VIM cg27313572   | 0.001601114  | 0.956683829 |
| ZWINT cg00371482 | 0.0024496    | 0.885996111 |
| ZWINT cg01021053 | 3.20074E-05  | 0.997916419 |
| ZWINT cg02286335 | -0.012905767 | 0.443632811 |
| ZWINT cg06313381 | 0.000189397  | 0.993950712 |
| ZWINT cg12758503 | -0.005411067 | 0.677925067 |
| ZWINT cg14642833 | -0.000731641 | 0.963150992 |
| ZWINT cg14859667 | 0.0022267    | 0.919634981 |
| ZWINT cg14993200 | -0.001964228 | 0.885235131 |
| ZWINT cg18242377 | -0.000549772 | 0.971150137 |
| ZWINT cg18534872 | -0.005538531 | 0.777519834 |
| ZWINT cg21206959 | -0.00204426  | 0.869561745 |
| ZWINT cg26022932 | -0.001551537 | 0.930183379 |



**Transsynaptic signaling signature referring to Fig. 2a, modified from Südhof (Neu**

| <b>Gene with CpG site</b> | <b>FDC in high-neural glioblastoma</b> | <b>p-value</b> |
|---------------------------|----------------------------------------|----------------|
| RTN4R cg00384653          | -0.163569391                           | 1.94975E-10    |
| RTN4R cg07543823          | -0.002704419                           | 0.473324917    |
| RTN4R cg07159686          | 0.005083913                            | 0.418604521    |
| RTN4R cg25037841          | -0.107083518                           | 1.38228E-09    |
| RTN4R cg22677723          | -0.088826076                           | 4.62418E-05    |
| RTN4R cg16474791          | -0.0378271                             | 0.044526358    |
| RTN4R cg17654470          | -0.008344876                           | 0.153435082    |
| RTN4R cg08557686          | -0.073962704                           | 0.000658163    |
| RTN4R cg07306604          | 0.01545919                             | 0.344251146    |
| RTN4R cg09784932          | 0.00253102                             | 0.718310769    |
| RTN4R cg12393104          | -0.037681387                           | 0.053041456    |
| RTN4R cg03475420          | -0.017258915                           | 0.163350774    |
| RTN4R cg06950987          | -0.010577435                           | 0.557488406    |
| RTN4R cg13397314          | -0.018913316                           | 0.251056554    |
| RTN4R cg18293555          | -0.108672173                           | 4.47977E-11    |
| RTN4L1 cg14571092         | -0.002093438                           | 0.944499614    |
| RTN4L1 cg15524101         | -0.011296758                           | 0.143492499    |
| RTN4L1 cg08457620         | -0.015623864                           | 0.019664367    |
| RTN4L1 cg26589485         | -0.065101821                           | 0.001004234    |
| RTN4L1 cg04207549         | -0.001436756                           | 0.865173265    |
| RTN4L1 cg17142404         | -0.004694868                           | 0.6250197      |
| RTN4L1 cg12967327         | -0.047972363                           | 5.92049E-06    |
| RTN4L1 cg27299033         | 0.024126915                            | 0.298772106    |
| RTN4L1 cg25813630         | 0.01434334                             | 0.767419742    |
| RTN4L1 cg21802919         | -0.008764141                           | 0.589586619    |
| RTN4L1 cg05879505         | -0.017007893                           | 0.384833114    |
| RTN4L1 cg05550893         | 0.003023605                            | 0.676283177    |
| RTN4L1 cg24948079         | -0.00898084                            | 0.828517749    |
| RTN4L1 cg26365813         | 0.100362235                            | 1.30704E-05    |
| RTN4L1 cg08454053         | -0.240042615                           | 1.09841E-13    |
| RTN4L1 cg23630423         | -0.007328024                           | 0.435703131    |
| RTN4L1 cg20899146         | -0.010714353                           | 0.129490048    |
| RTN4L1 cg27466709         | -0.001080031                           | 0.97263183     |
| RTN4L1 cg01019770         | 0.000381157                            | 0.950671923    |
| RTN4L1 cg23669611         | -0.075411963                           | 0.001002527    |
| RTN4L1 cg11251135         | -0.004722523                           | 0.692376084    |
| RTN4L1 cg08197956         | -0.083421339                           | 0.001791909    |
| RTN4L1 cg23094620         | -0.001723671                           | 0.954903472    |
| RTN4L1 cg03214325         | -0.150356281                           | 1.12873E-06    |
| RTN4L1 cg22791545         | -0.048514263                           | 0.024523234    |
| RTN4L1 cg26699755         | -0.001769774                           | 0.900233057    |
| RTN4L1 cg19550533         | 0.013206738                            | 0.540624323    |
| RTN4L1 cg06791321         | -0.010481482                           | 0.140859906    |

|                   |              |             |
|-------------------|--------------|-------------|
| RTN4L1 cg07471768 | -0.013004228 | 0.219802477 |
| RTN4L1 cg14249528 | -0.009079157 | 0.535249962 |
| RTN4L1 cg18059383 | -0.094528639 | 0.000122322 |
| RTN4L1 cg14769786 | 0.017982035  | 0.699193461 |
| RTN4L1 cg23289581 | -0.106816381 | 0.000224799 |
| RTN4L1 cg02064158 | 0.020129041  | 0.136267975 |
| RTN4L1 cg04584833 | -0.041154555 | 0.000793731 |
| RTN4L1 cg26772766 | 0.048018877  | 0.111762575 |
| RTN4L1 cg20641798 | -0.021054591 | 0.256271616 |
| RTN4L1 cg05861697 | -0.031270109 | 0.124762307 |
| RTN4L1 cg08875357 | -0.031020027 | 0.343418755 |
| RTN4L1 cg04743758 | -0.095097305 | 0.000141019 |
| RTN4L1 cg10479452 | -0.02997131  | 0.067700991 |
| RTN4L1 cg11398400 | -0.006857137 | 0.392167209 |
| RTN4L1 cg19619387 | -0.080097754 | 2.83064E-05 |
| RTN4L1 cg07061728 | -0.006752758 | 0.847154062 |
| RTN4L2 cg08924696 | -0.004594952 | 0.671421409 |
| RTN4L2 cg12528597 | -0.006040687 | 0.797422824 |
| RTN4L2 cg12822074 | 0.080823898  | 0.002126876 |
| RTN4L2 cg08081323 | 0.027756014  | 0.395520151 |
| RTN4L2 cg19956836 | -0.053083516 | 0.175971984 |
| RTN4L2 cg01932827 | -0.031446302 | 0.017362312 |
| RTN4L2 cg03280245 | 0.044349335  | 0.041109821 |
| RTN4L2 cg25625670 | -0.002563108 | 0.762382678 |
| RTN4L2 cg01557260 | 0.007324478  | 0.773672231 |
| RTN4L2 cg18048562 | 0.028800883  | 0.523313926 |
| RTN4L2 cg21121024 | -0.006934499 | 0.47380617  |
| RTN4L2 cg17349753 | -2.84478E-05 | 0.996811061 |
| RTN4L2 cg24983959 | -0.012058136 | 0.568722296 |
| ODZ2 cg06873590   | -0.022927018 | 0.681994829 |
| ODZ2 cg26874611   | 0.002056249  | 0.972226343 |
| ODZ2 cg09025649   | -0.004839654 | 0.668681271 |
| ODZ2 cg19775582   | -0.093295667 | 0.031530343 |
| ODZ2 cg19836145   | -0.121834238 | 6.0882E-06  |
| ODZ2 cg08463280   | 0.019283128  | 0.479267114 |
| ODZ2 cg11097249   | -0.051365481 | 0.324890101 |
| ODZ2 cg19537558   | -0.033834744 | 0.229780867 |
| ODZ2 cg10647925   | -0.011216846 | 0.449790807 |
| ODZ2 cg08815365   | -0.01620774  | 0.773970919 |
| ODZ2 cg18013921   | -0.015790813 | 0.148701424 |
| ODZ2 cg01227558   | -0.043684991 | 0.437050766 |
| ODZ2 cg15380508   | 0.034596047  | 0.146069548 |
| ODZ2 cg12659981   | -0.06996702  | 0.162262678 |
| ODZ2 cg01015395   | -0.076952413 | 0.006894701 |
| ODZ2 cg07705913   | -0.04109201  | 0.025188218 |
| ODZ2 cg06651505   | -0.136946749 | 3.15466E-05 |
| ODZ2 cg15090161   | -0.068920102 | 0.002847193 |
| ODZ2 cg06507590   | -0.025017963 | 0.536019184 |
| ODZ2 cg06793849   | 0.067128839  | 0.037684939 |

|                 |              |             |
|-----------------|--------------|-------------|
| ODZ2 cg17567195 | -0.110622403 | 6.19214E-07 |
| ODZ2 cg13365822 | -0.077882473 | 0.110539179 |
| ODZ2 cg00045762 | -0.011730005 | 0.462527886 |
| ODZ2 cg19913582 | -0.001041844 | 0.874322035 |
| ODZ2 cg11107657 | -0.060814399 | 0.001587983 |
| ODZ2 cg18994744 | -0.010618774 | 0.377190364 |
| ODZ2 cg05600609 | -0.102156609 | 0.002690667 |
| ODZ2 cg11061434 | -0.010008157 | 0.870990332 |
| ODZ2 cg05030450 | -0.037024634 | 0.162508638 |
| ODZ2 cg09171112 | -0.004019352 | 0.156362092 |
| ODZ2 cg16531386 | -0.062987076 | 0.012453339 |
| ODZ2 cg18679069 | -0.027889077 | 0.472496724 |
| ODZ2 cg01881971 | -0.051997843 | 0.006734446 |
| ODZ2 cg14653988 | -0.009926227 | 0.799137763 |
| ODZ2 cg22816865 | -0.173133378 | 7.61005E-07 |
| ODZ2 cg18026062 | -0.003136793 | 0.947274315 |
| ODZ2 cg10882756 | -0.025457917 | 0.620094265 |
| ODZ2 cg24180759 | -0.171529612 | 1.53196E-06 |
| ODZ2 cg18287241 | -0.098536683 | 7.13862E-06 |
| ODZ2 cg09555364 | 0.014200431  | 0.17810381  |
| ODZ2 cg22656750 | -0.061691925 | 0.197257065 |
| ODZ2 cg19984170 | -0.044159103 | 0.102311761 |
| ODZ2 cg05207048 | -0.122909801 | 1.21089E-06 |
| ODZ2 cg00615414 | -0.095769283 | 0.053274621 |
| ODZ2 cg26101465 | 0.001627117  | 0.76348652  |
| ODZ2 cg11483884 | 0.025467358  | 0.55555043  |
| ODZ2 cg23981116 | -0.161184903 | 0.000195204 |
| ODZ2 cg13983686 | 0.005408333  | 0.89805572  |
| ODZ2 cg15651267 | 0.002898656  | 0.744528503 |
| ODZ2 cg01897191 | 0.022729186  | 0.497792345 |
| ODZ2 cg16658460 | 0.081411627  | 8.5633E-06  |
| ODZ2 cg16656232 | 0.00766472   | 0.633818466 |
| ODZ2 cg23072711 | -0.04547731  | 0.28660498  |
| ODZ2 cg17405646 | -0.01186466  | 0.811086764 |
| ODZ2 cg08985853 | -0.011028165 | 0.827263583 |
| ODZ2 cg10602135 | -0.002031086 | 0.932179864 |
| ODZ2 cg16434098 | -0.077091191 | 0.011714837 |
| ODZ2 cg11091196 | -0.03915116  | 0.071065386 |
| ODZ2 cg27022334 | -0.027910606 | 0.228494043 |
| ODZ2 cg01540953 | -0.047819676 | 0.007694419 |
| ODZ2 cg07141875 | -0.05496698  | 0.001045566 |
| ODZ2 cg22554488 | -0.067388422 | 0.155896903 |
| ODZ2 cg21188154 | -0.03558129  | 0.065526967 |
| ODZ2 cg02667656 | 0.088494341  | 8.11927E-10 |
| ODZ2 cg18243017 | 0.006651407  | 0.565612026 |
| ODZ2 cg04221388 | 0.017905731  | 0.00226857  |
| ODZ2 cg07474269 | 0.002438465  | 0.734491614 |
| ODZ2 cg16190746 | -0.056485736 | 0.010939924 |
| ODZ2 cg08577341 | -0.006069406 | 0.71013585  |

|                 |              |             |
|-----------------|--------------|-------------|
| ODZ2 cg17543425 | -0.018011809 | 0.392372531 |
| ODZ2 cg04001520 | 0.067086849  | 1.44614E-06 |
| ODZ2 cg08769507 | -0.011535711 | 0.124713376 |
| ODZ2 cg00540540 | -0.153254387 | 2.1143E-06  |
| ODZ3 cg21746339 | -0.002481606 | 0.710468893 |
| ODZ3 cg22654504 | -0.025820283 | 0.468837301 |
| ODZ3 cg26850677 | -0.029198169 | 0.50961043  |
| ODZ3 cg25311162 | -0.100082342 | 0.003189984 |
| ODZ3 cg06366833 | -0.138781399 | 5.76902E-10 |
| ODZ3 cg19251291 | -0.053413355 | 0.129765284 |
| ODZ3 cg00767135 | -0.009644639 | 0.28624443  |
| ODZ3 cg01289782 | -0.001175681 | 0.907457621 |
| ODZ3 cg21618036 | -0.10269999  | 0.008152765 |
| ODZ3 cg21659014 | -0.012866844 | 0.165261181 |
| ODZ3 cg06589421 | -0.047257186 | 0.124621609 |
| ODZ3 cg16508529 | 0.015293899  | 0.610017809 |
| ODZ3 cg09054951 | -0.047542956 | 0.359789482 |
| ODZ3 cg00517849 | -0.020780759 | 0.204381575 |
| ODZ3 cg11760342 | -0.105530238 | 7.14454E-09 |
| ODZ3 cg08182463 | -0.023929854 | 0.092137719 |
| ODZ3 cg17594004 | -0.019651041 | 0.349786382 |
| ODZ3 cg08174779 | -0.045392104 | 0.006533217 |
| ODZ3 cg03242448 | 0.001863214  | 0.870944435 |
| ODZ3 cg10226257 | -0.038681439 | 0.088343291 |
| ODZ3 cg21165501 | -0.095689341 | 0.003850862 |
| ODZ3 cg01182076 | -0.072091925 | 0.074905952 |
| ODZ3 cg23625823 | -0.033913139 | 0.532202373 |
| ODZ3 cg26677675 | -0.026113919 | 0.235562321 |
| ODZ3 cg05342469 | -0.036088472 | 0.260123484 |
| ODZ3 cg16793274 | -0.004997472 | 0.199522839 |
| ODZ3 cg09378743 | -0.010591545 | 0.662209395 |
| ODZ3 cg00330059 | 0.008236539  | 0.423983583 |
| ODZ3 cg19667211 | -0.005456963 | 0.381047648 |
| ODZ3 cg11778362 | -0.035035004 | 0.168847776 |
| ODZ3 cg01950474 | -0.006191225 | 0.898152489 |
| ODZ3 cg22878084 | -0.04042589  | 0.150299464 |
| ODZ3 cg13131878 | -0.018241152 | 0.421072522 |
| ODZ3 cg23344136 | -0.055387222 | 0.074126785 |
| ODZ3 cg05673204 | -6.43949E-05 | 0.996912409 |
| ODZ3 cg14981034 | -0.075316413 | 0.072848907 |
| ODZ3 cg14231974 | -0.00077899  | 0.845035902 |
| ODZ3 cg25979373 | -0.074982371 | 0.015115758 |
| ODZ3 cg05690069 | -0.028245543 | 0.393792906 |
| ODZ3 cg08810664 | -0.00563498  | 0.620556813 |
| ODZ3 cg10992201 | -0.032736675 | 0.070952048 |
| ODZ3 cg04973839 | -0.033377563 | 0.313280733 |
| ODZ3 cg08802511 | -0.000812957 | 0.935649851 |
| ODZ3 cg01546472 | -0.002749565 | 0.837661228 |
| ODZ3 cg23824376 | -0.017805322 | 0.399600077 |

|                 |              |             |
|-----------------|--------------|-------------|
| ODZ3 cg04774696 | -0.083383449 | 0.000202705 |
| ODZ3 cg16548818 | -0.014747977 | 0.704259008 |
| ODZ3 cg13322601 | -0.00801397  | 0.692940842 |
| ODZ3 cg06527816 | -0.003978843 | 0.849478092 |
| ODZ3 cg19111338 | -0.118846006 | 1.98411E-05 |
| ODZ3 cg22051345 | -0.011519325 | 0.104507927 |
| ODZ3 cg04090412 | -0.17227541  | 5.34006E-06 |
| ODZ3 cg10136736 | 0.001160036  | 0.932016066 |
| ODZ3 cg09298466 | -0.141718583 | 0.000308349 |
| ODZ3 cg21122439 | -0.022094688 | 0.237171589 |
| ODZ3 cg02422426 | -0.019412847 | 0.348922423 |
| ODZ3 cg19082230 | -0.068335215 | 0.001398762 |
| ODZ3 cg17790852 | -0.022505946 | 0.403347726 |
| ODZ3 cg16690577 | -0.128674073 | 2.36557E-05 |
| ODZ3 cg01802453 | -0.020737144 | 0.620907756 |
| ODZ3 cg09767602 | -0.051301227 | 0.115941926 |
| ODZ4 cg17996830 | -0.174467115 | 8.87293E-07 |
| ODZ4 cg08734703 | 0.027381435  | 0.208865077 |
| ODZ4 cg12245084 | 0.042855183  | 0.311944685 |
| ODZ4 cg14565764 | -0.003314432 | 0.317821611 |
| ODZ4 cg15006118 | -0.007984886 | 0.233733    |
| ODZ4 cg03599147 | -0.010042163 | 0.261122808 |
| ODZ4 cg26707845 | 0.000136643  | 0.970400324 |
| ODZ4 cg19234412 | 0.014613801  | 0.586871304 |
| ODZ4 cg25198661 | 0.003572233  | 0.544899783 |
| ODZ4 cg13787610 | -0.013573539 | 0.429819259 |
| ODZ4 cg23361764 | -0.109268494 | 6.10121E-06 |
| ODZ4 cg08683012 | -0.000722669 | 0.927288976 |
| ODZ4 cg13493005 | -0.022612705 | 0.279429862 |
| ODZ4 cg09419192 | 0.026839773  | 0.171553586 |
| ODZ4 cg22284860 | -0.018089644 | 0.489092839 |
| ODZ4 cg08580087 | -0.063269492 | 0.040247153 |
| ODZ4 cg04649598 | 0.001793771  | 0.75164744  |
| ODZ4 cg18777792 | -0.003585407 | 0.203758352 |
| ODZ4 cg24810917 | -0.000478284 | 0.910540938 |
| ODZ4 cg17395738 | 0.004821915  | 0.61341036  |
| ODZ4 cg03825175 | 0.070909795  | 0.02834512  |
| ODZ4 cg15678386 | -0.008474528 | 0.256026153 |
| ODZ4 cg15137643 | -0.004460355 | 0.78877299  |
| ODZ4 cg06959283 | -0.008601173 | 0.006873275 |
| ODZ4 cg12830752 | -0.003755428 | 0.895552313 |
| ODZ4 cg11097902 | 0.001099819  | 0.878248142 |
| ODZ4 cg04212127 | -0.00148377  | 0.959965768 |
| ODZ4 cg10365900 | -0.014741401 | 0.08917661  |
| ODZ4 cg21094613 | -0.007669688 | 0.201536383 |
| ODZ4 cg10775595 | -0.044933381 | 0.061351147 |
| ODZ4 cg03177972 | 0.000508372  | 0.985243082 |
| ODZ4 cg18222192 | 0.056480947  | 0.00029437  |
| ODZ4 cg07233109 | -0.049714341 | 0.009092353 |

|                 |              |             |
|-----------------|--------------|-------------|
| ODZ4 cg01665408 | -0.022091507 | 0.023818567 |
| ODZ4 cg25487430 | -0.049801212 | 0.025869304 |
| ODZ4 cg20831648 | -0.018012234 | 0.360942269 |
| ODZ4 cg11251728 | -0.109742468 | 0.001423842 |
| ODZ4 cg01943983 | -0.012981991 | 0.044783509 |
| ODZ4 cg12851789 | -0.056835433 | 0.007720495 |
| ODZ4 cg09143850 | -0.003565321 | 0.396299116 |
| ODZ4 cg12643458 | 0.162343827  | 4.75678E-12 |
| ODZ4 cg15110243 | -0.00565151  | 0.73913435  |
| ODZ4 cg07441953 | 7.35109E-05  | 0.99840531  |
| ODZ4 cg13242944 | -0.018534006 | 0.257632676 |
| ODZ4 cg07340447 | -0.128338064 | 0.000702066 |
| ODZ4 cg06562283 | -0.002863464 | 0.908575246 |
| ODZ4 cg26703880 | -0.012613947 | 0.725072507 |
| ODZ4 cg09286493 | -0.059668768 | 0.037636124 |
| ODZ4 cg23982226 | -0.036767693 | 0.001802118 |
| ODZ4 cg08794954 | -0.019164874 | 0.012041012 |
| ODZ4 cg12986485 | 0.017871723  | 0.256343652 |
| ODZ4 cg18224993 | -0.092313843 | 1.08484E-09 |
| ODZ4 cg21765235 | -0.003133995 | 0.602861783 |
| ODZ4 cg05797821 | -0.001254244 | 0.876558327 |
| ODZ4 cg10933002 | -0.01896796  | 0.389077716 |
| ODZ4 cg27214378 | -0.006459874 | 0.294509295 |
| ODZ4 cg14417468 | -0.010869054 | 0.262004215 |
| ODZ4 cg22987614 | -0.095698327 | 1.83237E-05 |
| ODZ4 cg12642289 | -0.005678078 | 0.053564859 |
| ODZ4 cg11172483 | -0.024915923 | 0.001703175 |
| ODZ4 cg26879899 | -0.006958631 | 0.171189135 |
| ODZ4 cg15310583 | 0.001578133  | 0.974711777 |
| ODZ4 cg24860429 | -0.002416099 | 0.676037468 |
| ODZ4 cg24070541 | -0.017422161 | 0.061262966 |
| ODZ4 cg12051260 | -0.00318661  | 0.779430496 |
| ODZ4 cg17146918 | -0.008228593 | 0.456468454 |
| ODZ4 cg06251348 | 0.02919436   | 0.000987703 |
| ODZ4 cg15714223 | 3.34092E-05  | 0.99881666  |
| ODZ4 cg10030504 | -0.172918694 | 4.14833E-06 |
| ODZ4 cg06330691 | -0.029255161 | 0.107817602 |
| ODZ4 cg13062618 | 0.026035781  | 0.009156543 |
| ODZ4 cg12025243 | -0.010912948 | 0.123589368 |
| ODZ4 cg14762722 | -0.006258004 | 0.04664325  |
| ODZ4 cg24277007 | -0.002054952 | 0.939520049 |
| ODZ4 cg00366359 | -0.045879917 | 0.003594975 |
| ODZ4 cg19884965 | -0.003347852 | 0.863563678 |
| ODZ4 cg19407682 | -0.038478048 | 0.016213238 |
| ODZ4 cg10640961 | -0.021015459 | 0.252597997 |
| ODZ4 cg25965355 | -0.013675882 | 0.044470732 |
| ODZ4 cg02760300 | 0.046801958  | 2.24329E-06 |
| ODZ4 cg15765817 | -0.001537398 | 0.776306521 |
| ODZ4 cg09966895 | -0.002103486 | 0.828415537 |



|                  |              |             |
|------------------|--------------|-------------|
| ODZ4 cg02594183  | -0.035043577 | 0.050640878 |
| ODZ4 cg12162138  | -0.03711496  | 0.159234319 |
| ODZ4 cg13228701  | 0.034979954  | 0.028119591 |
| ODZ4 cg16235582  | -0.019709886 | 0.022062241 |
| ODZ4 cg26430023  | -0.04715905  | 0.001367813 |
| ODZ4 cg23279192  | -0.071990148 | 0.004965821 |
| ODZ4 cg02409108  | -0.015532745 | 0.230850452 |
| ODZ4 cg26977644  | -0.003110833 | 0.557167295 |
| ODZ4 cg15355859  | -0.111376311 | 0.003598436 |
| ODZ4 cg05172425  | -0.046347346 | 0.009710933 |
| ODZ4 cg05340269  | -0.019464253 | 0.766765379 |
| ODZ4 cg09673208  | 0.031428595  | 0.001671337 |
| ODZ4 cg14309111  | -0.0220523   | 0.199456574 |
| ODZ4 cg03648711  | -0.035156755 | 0.004530853 |
| ODZ4 cg11862642  | 0.050563961  | 0.0206119   |
| ODZ4 cg00908927  | -0.003788523 | 0.679560867 |
| ODZ4 cg20480334  | -0.009794264 | 0.010131028 |
| ODZ4 cg17542408  | 0.004751834  | 0.390240638 |
| ODZ4 cg24208325  | 0.027250674  | 0.399048223 |
| ODZ4 cg23956844  | -0.00386574  | 0.839449305 |
| ODZ4 cg08017233  | -0.029036355 | 0.032796304 |
| ODZ4 cg05218311  | -0.069473328 | 4.26685E-08 |
| ODZ4 cg12841273  | -0.041102399 | 0.004149478 |
| ODZ4 cg26452771  | 0.010924459  | 0.260060312 |
| ODZ4 cg14098737  | 0.002327263  | 0.914465083 |
| ODZ4 cg05099909  | -0.006188143 | 0.631100141 |
| ODZ4 cg03970849  | 0.035922129  | 0.249611712 |
| ODZ4 cg11179180  | -0.071995109 | 0.001116826 |
| ODZ4 cg17579825  | -0.002506921 | 0.42037745  |
| ODZ4 cg11076902  | -0.005304505 | 0.299891457 |
| ODZ4 cg11002763  | 0.017401963  | 0.408643574 |
| ODZ4 cg20482760  | 0.003400113  | 0.549347579 |
| ODZ4 cg04983516  | 0.01585668   | 0.690500144 |
| ODZ4 cg14294793  | -0.024203723 | 0.514275412 |
| ODZ4 cg12246510  | -0.011830882 | 0.678240037 |
| ODZ4 cg01149449  | -0.06014721  | 0.167804332 |
| ODZ4 cg08115371  | -0.011023995 | 0.015379693 |
| ODZ4 cg22782986  | 0.028784678  | 0.106235121 |
| ODZ4 cg11968091  | -0.008762329 | 0.208199581 |
| ODZ4 cg22318139  | 0.012292806  | 0.136147631 |
| ODZ4 cg15354625  | 0.119791732  | 2.2073E-06  |
| ODZ4 cg25783326  | -0.046768497 | 0.103861632 |
| ODZ4 cg18431910  | -0.053289724 | 0.203682184 |
| ODZ4 cg19842216  | -0.003476036 | 0.561043617 |
| ODZ4 cg06892009  | 0.000371332  | 0.981950747 |
| LPHN1 cg27499361 | -0.000538833 | 0.985262115 |
| LPHN1 cg19681357 | -0.010947202 | 0.013636055 |
| LPHN1 cg25726085 | -0.027911937 | 0.249510377 |
| LPHN1 cg24530000 | -0.009333296 | 0.400844681 |

|                  |              |             |
|------------------|--------------|-------------|
| LPHN1 cg08173263 | -0.016332269 | 0.540950535 |
| LPHN1 cg15417798 | 0.002097411  | 0.971875999 |
| LPHN1 cg04416414 | 0.001965502  | 0.603052507 |
| LPHN1 cg18544450 | -0.000354835 | 0.988164075 |
| LPHN1 cg10722938 | -0.01497432  | 0.094731337 |
| LPHN1 cg00037314 | -0.01373189  | 0.615374384 |
| LPHN1 cg21048262 | -0.015849442 | 0.197445694 |
| LPHN1 cg22791904 | -0.004912127 | 0.545928358 |
| LPHN1 cg14565903 | -0.001069317 | 0.889957006 |
| LPHN2 cg04789392 | -0.043858983 | 0.045056741 |
| LPHN2 cg19627200 | -0.009673066 | 0.580160502 |
| LPHN2 cg22534621 | -0.017513651 | 0.414800763 |
| LPHN2 cg17083209 | -0.011730057 | 0.143426923 |
| LPHN2 cg19744908 | 0.00234989   | 0.841732377 |
| LPHN2 cg07104652 | -0.008086374 | 0.257703935 |
| LPHN2 cg02996869 | -0.006134529 | 0.34732595  |
| LPHN2 cg02243785 | -0.001380926 | 0.847146326 |
| LPHN2 cg25974355 | -0.080179351 | 0.011654619 |
| LPHN2 cg22518696 | 0.005462166  | 0.704690738 |
| LPHN2 cg17870792 | 0.003911936  | 0.704720382 |
| LPHN2 cg00557709 | -0.004056602 | 0.65582222  |
| LPHN2 cg05125795 | -0.003951647 | 0.440935715 |
| LPHN2 cg07212035 | -0.001486728 | 0.858706292 |
| LPHN2 cg12130328 | -0.001190048 | 0.851993411 |
| LPHN2 cg13559233 | -0.0096435   | 0.379383496 |
| LPHN2 cg14562832 | -0.008316738 | 0.401842921 |
| LPHN2 cg04226724 | -0.003079773 | 0.762685264 |
| LPHN2 cg13980528 | -0.002682814 | 0.512473464 |
| LPHN2 cg20863963 | 0.000867855  | 0.964930317 |
| LPHN2 cg16678153 | -0.058975604 | 0.182702369 |
| LPHN2 cg21783729 | 8.77294E-05  | 0.992878157 |
| LPHN2 cg06940482 | -0.103581215 | 0.00064545  |
| LPHN2 cg14529474 | -0.014491961 | 0.039508648 |
| LPHN2 cg10992267 | -0.001699144 | 0.835333082 |
| LPHN3 cg06011964 | -0.000616432 | 0.946671225 |
| LPHN3 cg14382835 | 0.00996013   | 0.702532737 |
| LPHN3 cg19339146 | -0.073781669 | 0.004494027 |
| LPHN3 cg16406385 | -0.007109742 | 0.85235054  |
| LPHN3 cg26281476 | -0.005243061 | 0.707914715 |
| LPHN3 cg18242400 | -0.007129289 | 0.928653555 |
| LPHN3 cg14974938 | 0.077016089  | 0.010972429 |
| LPHN3 cg08572278 | -0.113869596 | 0.000660513 |
| LPHN3 cg12646794 | -0.11545607  | 9.07708E-06 |
| LPHN3 cg18416585 | 0.010181676  | 0.679327569 |
| LPHN3 cg00681365 | 0.000997815  | 0.94544881  |
| LPHN3 cg22671986 | 0.003374358  | 0.494086578 |
| LPHN3 cg09163478 | 0.003705789  | 0.624779314 |
| LPHN3 cg22479532 | 0.075512049  | 1.93096E-05 |
| LPHN3 cg21814870 | -0.128034686 | 7.15069E-05 |

|                  |              |             |
|------------------|--------------|-------------|
| LPHN3 cg06452184 | -0.117906107 | 2.71694E-13 |
| LPHN3 cg24221639 | -0.052933378 | 0.0022359   |
| LPHN3 cg09027155 | 0.009652454  | 0.813278317 |
| LPHN3 cg04331368 | 0.004296608  | 0.856986501 |
| LPHN3 cg06562406 | -0.051400888 | 0.049807603 |
| LPHN3 cg04118610 | 0.056792823  | 1.99965E-08 |
| LPHN3 cg24087039 | 0.005137676  | 0.65234177  |
| FLRT1 cg21111471 | -0.092470542 | 2.01942E-07 |
| FLRT1 cg18093064 | 0.005312318  | 0.455678372 |
| FLRT1 cg09375205 | -0.002308643 | 0.835284736 |
| FLRT1 cg06268327 | -0.018348736 | 0.29266931  |
| FLRT1 cg17676132 | -0.025376428 | 0.025221318 |
| FLRT1 cg01256440 | 0.002461313  | 0.694355151 |
| FLRT1 cg05016508 | -0.011043728 | 0.037592288 |
| FLRT1 cg08788438 | -0.00612117  | 0.660133809 |
| FLRT1 cg04740931 | -0.006241513 | 0.773072401 |
| FLRT1 cg13263274 | -0.040437845 | 0.122575027 |
| FLRT1 cg24431193 | -0.000511954 | 0.970093584 |
| FLRT1 cg15823423 | 0.001692869  | 0.79742368  |
| FLRT1 cg13555362 | -0.049417503 | 0.028611142 |
| FLRT2 cg01832662 | -0.105733015 | 8.47112E-05 |
| FLRT2 cg18386876 | -0.132733938 | 1.80208E-08 |
| FLRT2 cg21227253 | -0.003967727 | 0.869929312 |
| FLRT2 cg15922990 | -0.00168474  | 0.51494951  |
| FLRT2 cg13232249 | -0.005277889 | 0.158273411 |
| FLRT2 cg23934295 | -0.006215198 | 0.310917081 |
| FLRT2 cg22859727 | -0.011537603 | 0.830448096 |
| FLRT2 cg22518208 | -0.003980161 | 0.36334349  |
| FLRT2 cg01537995 | -0.001319866 | 0.921809089 |
| FLRT2 cg24775496 | -0.004402577 | 0.241957494 |
| FLRT2 cg07166601 | -0.001404018 | 0.872911568 |
| FLRT2 cg16492417 | -0.008342294 | 0.016133622 |
| FLRT2 cg02805920 | -0.004007814 | 0.143390871 |
| FLRT2 cg05295297 | 0.002630018  | 0.841144433 |
| FLRT2 cg13624964 | 0.001270889  | 0.82415814  |
| FLRT2 cg18070676 | -0.009876142 | 0.519050688 |
| FLRT2 cg19622874 | -0.002229057 | 0.524667495 |
| FLRT2 cg13594869 | -0.010933693 | 0.006460556 |
| FLRT2 cg18098534 | 0.011116916  | 0.190453847 |
| FLRT2 cg19687728 | -0.000475901 | 0.942500559 |
| FLRT2 cg02305242 | -0.004035886 | 0.797164064 |
| FLRT2 cg05855039 | -0.003871232 | 0.386002356 |
| FLRT2 cg04836612 | -0.001572407 | 0.820015664 |
| FLRT2 cg12155356 | -0.000450792 | 0.926380963 |
| FLRT2 cg16800165 | -0.022628742 | 0.326632309 |
| FLRT2 cg04435483 | -0.097708334 | 9.32725E-05 |
| FLRT2 cg17410236 | -0.009960255 | 0.71630448  |
| FLRT2 cg04862347 | -0.015365906 | 0.007003075 |
| FLRT2 cg05381290 | 0.003151545  | 0.697172436 |

|                  |              |             |
|------------------|--------------|-------------|
| FLRT2 cg18919660 | -0.006743234 | 0.350799969 |
| FLRT2 cg26235748 | -0.024839591 | 0.046385579 |
| FLRT2 cg04975505 | -0.003638517 | 0.742443154 |
| FLRT2 cg19953646 | -0.01877001  | 0.367543859 |
| FLRT2 cg01711160 | -0.004789274 | 0.26984704  |
| FLRT2 cg23000309 | -0.001681436 | 0.496285136 |
| FLRT2 cg02165099 | -0.002226296 | 0.78441662  |
| FLRT2 cg01485627 | -0.006627379 | 0.403707702 |
| FLRT2 cg12080751 | -0.050310683 | 0.000813751 |
| FLRT2 cg14125604 | -0.001138929 | 0.859592371 |
| FLRT2 cg10406690 | -0.020206243 | 0.565865898 |
| FLRT2 cg03506640 | -0.001019619 | 0.838824048 |
| FLRT2 cg14400498 | -0.031020885 | 0.44577676  |
| FLRT2 cg18845692 | -0.00026234  | 0.994005762 |
| FLRT2 cg02032642 | -0.069194665 | 0.001425379 |
| FLRT2 cg01919632 | -0.006196186 | 0.303087168 |
| FLRT2 cg25120290 | -0.004319752 | 0.362850181 |
| FLRT2 cg26651233 | 0.097372697  | 3.4711E-10  |
| FLRT2 cg21571339 | 0.000193833  | 0.986924338 |
| FLRT2 cg16324934 | -0.033345555 | 3.25511E-06 |
| FLRT3 cg17696268 | -0.001063625 | 0.861766681 |
| FLRT3 cg23127998 | -0.003842822 | 0.393222883 |
| FLRT3 cg10038446 | 0.064203047  | 0.013803621 |
| FLRT3 cg26082838 | -0.002519426 | 0.633167131 |
| FLRT3 cg17752684 | 0.009496258  | 0.370961798 |
| FLRT3 cg01642503 | -0.006949229 | 0.052961359 |
| FLRT3 cg06722503 | -0.000332135 | 0.921663401 |
| FLRT3 cg20886259 | 0.005044796  | 0.582777892 |
| FLRT3 cg00471768 | -0.030857318 | 0.344497811 |
| CA10 cg05229989  | -0.001729315 | 0.706451147 |
| CA10 cg06557985  | -0.000858145 | 0.781100075 |
| CA10 cg03145062  | -0.010253482 | 0.001654246 |
| CA10 cg21385821  | -0.001495079 | 0.665356204 |
| CA10 cg07723251  | -0.131685952 | 0.000125611 |
| CA10 cg25592977  | -0.027572476 | 0.112463793 |
| CA10 cg14054928  | -0.112970786 | 9.33887E-05 |
| CA10 cg24341611  | -0.107384612 | 0.00024312  |
| CA10 cg20552747  | 0.0427345    | 0.243849494 |
| CA10 cg13125157  | 0.005664535  | 0.834125575 |
| CA10 cg06598197  | -0.018905464 | 0.465055636 |
| CA10 cg08605326  | -0.020400601 | 0.552915295 |
| CA10 cg20405017  | -0.105790511 | 0.001611434 |
| CA10 cg07398767  | -0.00775376  | 0.825457631 |
| CA10 cg22855255  | -0.093691463 | 0.003488213 |
| CA10 cg08034077  | -0.005940466 | 0.89596393  |
| CA10 cg14073722  | 0.015420073  | 0.772873172 |
| CA10 cg26629942  | 0.045938656  | 0.176949828 |
| CA10 cg04881814  | -0.112805703 | 0.002654804 |
| CA10 cg17208530  | -0.050273452 | 0.254004298 |

|                    |              |             |
|--------------------|--------------|-------------|
| CA10 cg14056110    | -0.022396919 | 0.361503032 |
| CA10 cg22702328    | -0.027868175 | 0.284680704 |
| CA10 cg25039722    | 0.000173719  | 0.996743519 |
| CA10 cg07111868    | -0.006344468 | 0.405834559 |
| CA10 cg25694755    | -0.008690856 | 0.641891908 |
| CA10 cg17326372    | 0.00043519   | 0.995447628 |
| CA10 cg25063515    | -0.062617591 | 0.139179189 |
| CA10 cg19805005    | -0.067062249 | 0.089099788 |
| CA10 cg09486367    | 0.013793464  | 0.711998223 |
| CA10 cg07101732    | -0.05599696  | 0.134834213 |
| CA10 cg27504861    | -0.064702293 | 0.034246539 |
| CA10 cg11144436    | -0.009125434 | 0.748090463 |
| CA10 cg12691739    | 0.078741371  | 0.004439174 |
| CA10 cg25499121    | 0.01101937   | 0.802034949 |
| FAM19A1 cg03858703 | -0.06189949  | 0.044805453 |
| FAM19A1 cg22706186 | -0.08916105  | 0.00106626  |
| FAM19A1 cg02997497 | -0.040062414 | 0.340363205 |
| FAM19A1 cg01709518 | -0.117669605 | 0.000167256 |
| FAM19A1 cg03530364 | -0.038533809 | 0.410909882 |
| FAM19A1 cg12656851 | -0.069501343 | 0.106162494 |
| FAM19A1 cg09533390 | -0.009376732 | 0.876370573 |
| FAM19A1 cg13066983 | -0.037774928 | 0.320186821 |
| FAM19A1 cg09398550 | -0.021512496 | 0.711081858 |
| FAM19A1 cg20838162 | 0.004541424  | 0.935363199 |
| FAM19A1 cg21186449 | 0.0404089    | 0.337855164 |
| FAM19A1 cg13715590 | -0.017795022 | 0.764249258 |
| FAM19A1 cg10131312 | -0.084429031 | 1.10653E-05 |
| FAM19A2 cg10081664 | 0.024792822  | 0.667985799 |
| FAM19A2 cg12024564 | -0.007183657 | 0.418410393 |
| FAM19A2 cg16818505 | -0.064832803 | 0.143658825 |
| FAM19A2 cg26133399 | 0.003593263  | 0.924447116 |
| FAM19A2 cg02042710 | 0.000742254  | 0.873827344 |
| FAM19A2 cg23257289 | -0.003619508 | 0.608037634 |
| FAM19A2 cg25313447 | -0.038853579 | 0.27642167  |
| FAM19A2 cg11885965 | -0.02347425  | 0.620416898 |
| FAM19A2 cg01409597 | -0.057821929 | 0.107574812 |
| FAM19A2 cg09741713 | -0.004542129 | 0.910708105 |
| FAM19A2 cg20010506 | -0.085635474 | 0.000528904 |
| FAM19A2 cg15319470 | -0.01899178  | 0.656819806 |
| FAM19A2 cg12243597 | -0.02708309  | 0.373772978 |
| FAM19A2 cg07000713 | -0.001410095 | 0.883612122 |
| FAM19A2 cg23992583 | -0.038419648 | 0.421833799 |
| FAM19A2 cg24480012 | 0.006618674  | 0.905205224 |
| FAM19A2 cg20041366 | 0.020566265  | 0.751121119 |
| FAM19A2 cg03001945 | -0.0239173   | 0.234768765 |
| FAM19A2 cg00089798 | -0.003597664 | 0.430412332 |
| FAM19A2 cg15736338 | -0.001893449 | 0.572333962 |
| FAM19A2 cg20007569 | -0.058937896 | 0.165396466 |
| FAM19A2 cg23163783 | -0.02255724  | 0.713222187 |

|                    |              |             |
|--------------------|--------------|-------------|
| FAM19A2 cg23767318 | -0.06177816  | 0.114654256 |
| FAM19A2 cg06438300 | 0.028444115  | 0.566617231 |
| FAM19A2 cg22163130 | -0.015331175 | 0.817513817 |
| FAM19A2 cg05145776 | -0.002476782 | 0.972012445 |
| FAM19A3 cg10806711 | 0.018850861  | 0.54995709  |
| FAM19A3 cg09126636 | 0.008513095  | 0.18242398  |
| FAM19A3 cg16255156 | -0.007704655 | 0.578695104 |
| FAM19A3 cg19675955 | -0.010832493 | 0.833028129 |
| FAM19A3 cg00342891 | -0.014109744 | 0.819020138 |
| FAM19A3 cg07023459 | 0.007378497  | 0.351354958 |
| FAM19A3 cg26190476 | 0.004966679  | 0.851254816 |
| FAM19A3 cg15070208 | -0.003210341 | 0.954940594 |
| FAM19A3 cg16716189 | -0.068471625 | 8.33387E-05 |
| FAM19A3 cg23746359 | 0.010867945  | 0.450566075 |
| FAM19A3 cg02922094 | -0.037750754 | 0.01672228  |
| FAM19A3 cg10834677 | -0.059055724 | 0.003350291 |
| FAM19A4 cg22996308 | -0.011557739 | 0.73107613  |
| FAM19A4 cg15734409 | 0.021121208  | 0.601695362 |
| FAM19A4 cg19508285 | 0.061242733  | 0.173269322 |
| FAM19A4 cg14581287 | 0.084904144  | 0.023462972 |
| FAM19A4 cg22871175 | 0.01782849   | 0.755435126 |
| FAM19A4 cg16725723 | 0.034398035  | 0.543578222 |
| FAM19A4 cg08855630 | 0.058172474  | 0.056339209 |
| FAM19A4 cg03186486 | 0.079568062  | 0.021562509 |
| FAM19A4 cg05893614 | 0.071495376  | 0.037865272 |
| FAM19A4 cg12417685 | 0.060737357  | 0.092068291 |
| FAM19A4 cg03427298 | 0.018859312  | 0.733347596 |
| FAM19A4 cg15356923 | -0.012471753 | 0.770205251 |
| FAM19A4 cg13921352 | -0.004198216 | 0.936326076 |
| FAM19A4 cg09868336 | -0.055097394 | 0.04926024  |
| FAM19A4 cg12219082 | -0.012104559 | 0.141800704 |
| FAM19A4 cg20375342 | -0.011128608 | 0.804968353 |
| FAM19A4 cg08038353 | 0.026203715  | 0.568118019 |
| FAM19A4 cg12412079 | -0.077721452 | 0.115102117 |
| FAM19A4 cg23967169 | -0.061796245 | 0.046680655 |
| FAM19A4 cg08495813 | 0.031110742  | 0.486732374 |
| FAM19A5 cg04377908 | -0.03672815  | 0.101118882 |
| FAM19A5 cg00743803 | 0.007760672  | 0.817884774 |
| FAM19A5 cg22504180 | 0.01014879   | 0.256383618 |
| FAM19A5 cg21564495 | 0.014482816  | 0.227485506 |
| FAM19A5 cg23400715 | -0.015566438 | 0.00705877  |
| FAM19A5 cg23332586 | -0.01976863  | 0.027363473 |
| FAM19A5 cg19122206 | -0.035099844 | 0.058659335 |
| FAM19A5 cg07900958 | 0.031606579  | 0.049038923 |
| FAM19A5 cg16609342 | 0.037975493  | 0.000568941 |
| FAM19A5 cg14026113 | 0.075160295  | 0.015703399 |
| FAM19A5 cg23902471 | 0.007142039  | 0.429517309 |
| FAM19A5 cg03440540 | 0.007728629  | 0.781285986 |
| FAM19A5 cg20014942 | -0.019891968 | 0.546875347 |

|                    |              |             |
|--------------------|--------------|-------------|
| FAM19A5 cg02582669 | -0.009376012 | 0.822572982 |
| FAM19A5 cg02905830 | 0.004101041  | 0.403989442 |
| FAM19A5 cg14894848 | 0.029608102  | 0.125254046 |
| FAM19A5 cg11562401 | -0.055298952 | 0.016996579 |
| FAM19A5 cg04304705 | -0.023390139 | 0.229829083 |
| FAM19A5 cg00444884 | -0.010536219 | 0.162497882 |
| FAM19A5 cg02895639 | 0.008632327  | 0.828323837 |
| FAM19A5 cg06340899 | -0.015201085 | 0.712459005 |
| FAM19A5 cg25338000 | -0.084669727 | 3.15268E-06 |
| FAM19A5 cg04970014 | 0.045347535  | 0.002763036 |
| FAM19A5 cg15665276 | 0.004369224  | 0.622102399 |
| FAM19A5 cg10902101 | 0.016370168  | 0.19458977  |
| FAM19A5 cg00223715 | 0.029872415  | 0.026737718 |
| FAM19A5 cg15187790 | 0.01387723   | 0.630933338 |
| FAM19A5 cg19030607 | 0.040583713  | 0.114697006 |
| FAM19A5 cg11168293 | 0.035888417  | 0.1216771   |
| FAM19A5 cg00286513 | 0.011851569  | 0.438831839 |
| FAM19A5 cg22682460 | 0.016589805  | 0.119688291 |
| FAM19A5 cg25975712 | 0.015390889  | 0.127726696 |
| FAM19A5 cg07416315 | -0.020070324 | 0.058002082 |
| FAM19A5 cg23936463 | 0.002543175  | 0.94469913  |
| FAM19A5 cg19734830 | -0.001505562 | 0.949174418 |
| FAM19A5 cg14263779 | 0.009202495  | 0.595070106 |
| FAM19A5 cg22643811 | 8.90624E-05  | 0.995419705 |
| FAM19A5 cg18013185 | -0.017519972 | 0.654981999 |
| FAM19A5 cg04012844 | -0.001514042 | 0.956295915 |
| FAM19A5 cg06937832 | 0.020484684  | 0.466367482 |
| FAM19A5 cg15977904 | -0.0032563   | 0.844508518 |
| FAM19A5 cg15271942 | 0.071421252  | 5.56685E-05 |
| FAM19A5 cg12539917 | -0.006396275 | 0.374384473 |
| FAM19A5 cg04382374 | -0.000217826 | 0.977259551 |
| FAM19A5 cg05072413 | 0.004652969  | 0.77514505  |
| FAM19A5 cg26700320 | 0.005849537  | 0.416231839 |
| FAM19A5 cg24343361 | -0.022342323 | 0.336685597 |
| FAM19A5 cg22989103 | 0.083086792  | 0.0026404   |
| FAM19A5 cg12986453 | -0.002452063 | 0.437100012 |
| FAM19A5 cg27652464 | 0.072015478  | 0.002147594 |
| FAM19A5 cg04302775 | -0.071478425 | 4.93953E-06 |
| FAM19A5 cg13868165 | 0.027212074  | 0.016281929 |
| FAM19A5 cg14984160 | 0.026429249  | 0.036212233 |
| FAM19A5 cg00481629 | 0.065580125  | 0.007501935 |
| FAM19A5 cg13872278 | -0.005747837 | 0.898556942 |
| FAM19A5 cg05532594 | 0.004412277  | 0.816217242 |
| FAM19A5 cg00147509 | -0.058527805 | 0.008337943 |
| FAM19A5 cg16909646 | -0.005051874 | 0.721412748 |
| FAM19A5 cg11352418 | 0.006269859  | 0.890701952 |
| FAM19A5 cg08719296 | 0.008289927  | 0.578281703 |
| FAM19A5 cg24222175 | 0.008807696  | 0.44430434  |
| FAM19A5 cg20640347 | -0.091702025 | 4.5308E-05  |

|                         |              |             |
|-------------------------|--------------|-------------|
| FAM19A5 cg20503649      | 0.000634086  | 0.96450253  |
| FAM19A5 cg01816146      | 0.011688819  | 0.633275693 |
| FAM19A5 cg07305859      | -0.023755671 | 0.001425301 |
| FAM19A5 cg01730859      | -0.104334788 | 0.000507047 |
| FAM19A5 cg05155289      | 0.014040637  | 0.20515973  |
| FAM19A5 cg14596108      | 0.018629397  | 0.351633262 |
| FAM19A5 cg06273376      | -0.070352502 | 0.046917303 |
| FAM19A5 cg12454595      | 0.011398338  | 0.736012824 |
| FAM19A5 cg01616797      | 0.021187222  | 0.3802784   |
| FAM19A5 cg19203800      | -0.068538008 | 0.013375907 |
| FAM19A5 cg26120340      | -0.052457901 | 0.000449678 |
| FAM19A5 cg11403706      | -0.01869913  | 0.042111709 |
| FAM19A5 cg03312805      | 0.000931697  | 0.974522172 |
| FAM19A5 cg05992904      | -0.025488632 | 0.047273538 |
| FAM19A5 cg08760753      | -0.037028436 | 0.00304175  |
| FAM19A5 cg04198308      | -0.005659041 | 0.897435986 |
| FAM19A5 cg16243558      | -0.005762567 | 0.352400949 |
| FAM19A5 cg27308329      | -0.037440112 | 0.029870686 |
| FAM19A5 cg14517004      | -0.014588643 | 0.016164099 |
| FAM19A5 cg04478606      | -0.011808816 | 0.426708631 |
| FAM19A5 cg04930211      | 0.006865498  | 0.565301419 |
| FAM19A5 cg03196739      | 0.045716659  | 0.210108683 |
| FAM19A5 cg04493000      | 0.006774463  | 0.809089957 |
| FAM19A5 cg27309229      | -0.014737795 | 0.502714415 |
| FAM19A5 cg05006211      | 0.023036673  | 0.025935051 |
| FAM19A5 cg23678800      | 0.038606081  | 0.010971185 |
| FAM19A5 cg24094706      | 0.000891297  | 0.916661555 |
| FAM19A5 cg01216108      | 0.001047254  | 0.916118886 |
| FAM19A5 cg00373397      | -0.009219385 | 0.070145625 |
| GRIK1 cg01622416        | -0.069971392 | 4.34234E-07 |
| GRIK1 cg07028661        | -0.034300068 | 0.026839287 |
| GRIK1 cg07950000        | -0.012509117 | 6.52709E-05 |
| GRIK1 cg08685096        | -0.00429429  | 0.381047648 |
| GRIK1 cg09199698        | -0.007273153 | 0.029852865 |
| GRIK1 cg09542111        | -0.004932496 | 0.044463315 |
| GRIK1 cg12079381        | -0.09193351  | 0.001208047 |
| GRIK1 cg21816539        | -0.004396307 | 0.113207434 |
| GRIK1 cg23475371        | -0.010276781 | 0.079981021 |
| GRIK1 cg24620508        | -0.072669287 | 5.12133E-08 |
| GRIK1 cg24868359        | -0.003155958 | 0.745987057 |
| <b>GRIK2 cg00135293</b> | -0.020128334 | 0.600792147 |
| <b>GRIK2 cg01737026</b> | -0.001760317 | 0.960435049 |
| <b>GRIK2 cg02011392</b> | -0.0387199   | 0.146367155 |
| <b>GRIK2 cg02063520</b> | -0.002745582 | 0.971634631 |
| <b>GRIK2 cg02837591</b> | -0.000621842 | 0.959434034 |
| <b>GRIK2 cg04498418</b> | -0.022704374 | 0.061279581 |
| <b>GRIK2 cg04708601</b> | 0.055951405  | 0.087930215 |
| <b>GRIK2 cg05666036</b> | -0.068849617 | 0.021866531 |



|                  |              |             |
|------------------|--------------|-------------|
| GRIK2 cg05942459 | -0.011276201 | 0.750989327 |
| GRIK2 cg06247406 | -0.019087852 | 0.508928305 |
| GRIK2 cg09447435 | -0.005892194 | 0.594360451 |
| GRIK2 cg10583180 | 0.026806958  | 0.452580288 |
| GRIK2 cg10591607 | -0.019016433 | 0.34628064  |
| GRIK2 cg10815152 | -0.053058349 | 0.026368963 |
| GRIK2 cg11976671 | 0.008661838  | 0.756955147 |
| GRIK2 cg12245867 | 0.003699321  | 0.591113455 |
| GRIK2 cg13080565 | -0.020472195 | 0.517376623 |
| GRIK2 cg13396607 | -0.092594269 | 0.014210684 |
| GRIK2 cg14082127 | -0.01539308  | 0.5369419   |
| GRIK2 cg15692593 | -0.047184001 | 0.027714605 |
| GRIK2 cg16009558 | -0.012949622 | 0.543244336 |
| GRIK2 cg18193094 | -0.017231501 | 0.456156082 |
| GRIK2 cg19088553 | 0.014959205  | 0.373609502 |
| GRIK2 cg19155518 | -0.009099117 | 0.614478977 |
| GRIK2 cg20640499 | -0.011081707 | 0.52253217  |
| GRIK2 cg21635870 | -0.015150244 | 0.626410557 |
| GRIK2 cg22541254 | -0.01659057  | 0.517583686 |
| GRIK2 cg22851944 | -0.006674575 | 0.787421753 |
| GRIK2 cg23666299 | 0.043797901  | 0.093329036 |
| GRIK2 cg24301620 | -0.020664797 | 0.436557075 |
| GRIK2 cg24432193 | 0.034705148  | 0.077880954 |
| GRIK2 cg24539500 | 0.013544392  | 0.090413022 |
| GRIK2 cg24574819 | -0.19115214  | 4.99826E-12 |
| GRIK2 cg24680758 | -0.010030595 | 0.64924192  |
| GRIK2 cg24753760 | -0.020792356 | 0.419247348 |
| GRIK2 cg26316946 | -0.015643415 | 0.504979631 |
| GRIK2 cg27074174 | -0.010915639 | 0.593981056 |
| GRIK2 cg27451362 | -0.036223756 | 0.067858421 |
| GRIK3 cg01577933 | -0.028295056 | 0.376041199 |
| GRIK3 cg03654504 | 0.045035689  | 0.047935253 |
| GRIK3 cg04509024 | -0.003485126 | 0.868557191 |
| GRIK3 cg04510788 | -0.021009669 | 0.220959661 |
| GRIK3 cg06165395 | -0.030466594 | 0.457689421 |
| GRIK3 cg06722633 | -0.014561763 | 0.279735626 |
| GRIK3 cg08004425 | -0.004959162 | 0.740466721 |
| GRIK3 cg08106961 | 0.065157296  | 0.000156865 |
| GRIK3 cg09134640 | -0.002115289 | 0.830768205 |
| GRIK3 cg09991710 | 0.004663927  | 0.773064542 |
| GRIK3 cg10126715 | -0.006690835 | 0.772192402 |
| GRIK3 cg10206594 | 0.006606909  | 0.779657822 |
| GRIK3 cg11836212 | 0.023854991  | 0.403812718 |
| GRIK3 cg13052954 | 0.037471325  | 0.07511663  |
| GRIK3 cg13272644 | -0.003370402 | 0.892577068 |
| GRIK3 cg13934830 | -0.00058238  | 0.820686982 |

|                  |              |             |
|------------------|--------------|-------------|
| GRIK3 cg14616584 | 0.01118559   | 0.620001197 |
| GRIK3 cg14960282 | 0.063135311  | 1.28279E-05 |
| GRIK3 cg14992273 | -0.033834865 | 0.028470113 |
| GRIK3 cg16379885 | -0.012835402 | 0.224638829 |
| GRIK3 cg16599703 | -0.012003416 | 0.113151105 |
| GRIK3 cg16911275 | 0.019277197  | 0.444293443 |
| GRIK3 cg17952046 | 0.001486409  | 0.965816843 |
| GRIK3 cg19206040 | -0.008774212 | 0.419493394 |
| GRIK3 cg19640303 | 0.009680366  | 0.010761839 |
| GRIK3 cg19727439 | -0.00548066  | 0.505252739 |
| GRIK3 cg20168230 | 0.001946216  | 0.946487193 |
| GRIK3 cg20779373 | -0.027027843 | 0.004394992 |
| GRIK3 cg21409965 | 0.030606008  | 0.163486999 |
| GRIK3 cg23715749 | 0.051041237  | 0.235559942 |
| GRIK3 cg24673742 | -0.058914665 | 0.126584351 |
| GRIK3 cg26337841 | 0.027115786  | 0.04498661  |
| GRIK3 cg27433516 | -0.105541083 | 0.003017791 |
| GRIK4 cg01868106 | 0.006294418  | 0.645264313 |
| GRIK4 cg03231471 | 0.043562058  | 0.081682232 |
| GRIK4 cg03303857 | -0.055284057 | 0.048351378 |
| GRIK4 cg04925085 | 0.001594117  | 0.608253338 |
| GRIK4 cg05431964 | -0.000538014 | 0.967604645 |
| GRIK4 cg06465194 | 0.126405576  | 6.54441E-10 |
| GRIK4 cg10961484 | 0.133377074  | 5.09454E-10 |
| GRIK4 cg11281320 | -0.057869816 | 0.101346698 |
| GRIK4 cg14462402 | 0.17017561   | 2.5435E-09  |
| GRIK4 cg14731698 | 0.003652442  | 0.591767993 |
| GRIK4 cg15174564 | 0.049854548  | 0.125236214 |
| GRIK4 cg16361867 | 0.023849255  | 0.618569873 |
| GRIK4 cg16730369 | -0.001066087 | 0.919208237 |
| GRIK4 cg18247436 | 0.043775599  | 0.129132836 |
| GRIK4 cg23315601 | -0.026643694 | 0.274647047 |
| GRIK4 cg23868250 | 0.004013482  | 0.910475514 |
| GRIK4 cg24226238 | 0.043780714  | 3.37307E-06 |
| GRIK4 cg24255125 | 0.051722682  | 0.112751961 |
| GRIK4 cg25113360 | -0.035249231 | 0.360107472 |
| GRIK4 cg25316569 | 0.105307257  | 3.03557E-06 |
| GRIK4 cg26914334 | -0.09017916  | 1.00579E-05 |
| GRIK4 cg27179693 | 0.17285459   | 2.70944E-13 |
| GRIK5 cg00553487 | -0.072494217 | 2.99598E-10 |
| GRIK5 cg03100024 | -0.059098359 | 0.189074239 |
| GRIK5 cg04695635 | -0.012900578 | 0.371628066 |
| GRIK5 cg04763994 | -0.027547444 | 0.177951069 |
| GRIK5 cg07746960 | -0.035429657 | 0.028318884 |
| GRIK5 cg08955995 | 0.072629107  | 0.017722413 |
| GRIK5 cg09434500 | 0.060131589  | 0.058025746 |

|                  |              |             |
|------------------|--------------|-------------|
| GRIK5 cg09555879 | -0.102587169 | 0.002428923 |
| GRIK5 cg09864457 | 0.095033994  | 0.017630048 |
| GRIK5 cg11640185 | -0.013229889 | 0.349784787 |
| GRIK5 cg11744436 | -0.09761625  | 7.3614E-06  |
| GRIK5 cg11844965 | 0.009910468  | 0.601701792 |
| GRIK5 cg11971789 | -0.00660983  | 0.657449804 |
| GRIK5 cg12544392 | -0.036816712 | 0.004817467 |
| GRIK5 cg12981270 | -0.000758221 | 0.928082019 |
| GRIK5 cg13298384 | -0.020855949 | 0.122115873 |
| GRIK5 cg13510813 | -0.025072967 | 0.146821375 |
| GRIK5 cg14036830 | 0.055858367  | 0.158584428 |
| GRIK5 cg17540575 | -0.015602268 | 0.545846583 |
| GRIK5 cg17726655 | -0.018621789 | 0.266363699 |
| GRIK5 cg17742947 | -0.029574445 | 0.149398432 |
| GRIK5 cg26314755 | 0.00363858   | 0.899074318 |
| GRIK5 cg26746936 | 0.075461164  | 0.008887935 |
| GRIK5 cg27167613 | -0.047701828 | 0.000979059 |
| UNC5A cg00041599 | -0.007536122 | 0.525643417 |
| UNC5A cg00513735 | -0.015252972 | 0.350779594 |
| UNC5A cg01099590 | 0.001183798  | 0.9371469   |
| UNC5A cg01184387 | 0.002895067  | 0.803126331 |
| UNC5A cg01476678 | -0.05860822  | 0.039728066 |
| UNC5A cg01485938 | 0.057688471  | 0.021416652 |
| UNC5A cg02114954 | 0.010369415  | 0.798909921 |
| UNC5A cg02616808 | 0.003250855  | 0.791844849 |
| UNC5A cg02633413 | -0.034052638 | 0.006167078 |
| UNC5A cg03320873 | -0.053426217 | 0.001762796 |
| UNC5A cg03679715 | -0.001776915 | 0.929153254 |
| UNC5A cg05475205 | -0.004290346 | 0.915787742 |
| UNC5A cg05593510 | 0.023442194  | 0.38144765  |
| UNC5A cg06527989 | -0.007200223 | 0.418213664 |
| UNC5A cg06849077 | -0.003798127 | 0.556980556 |
| UNC5A cg08029909 | -0.008764444 | 0.06664846  |
| UNC5A cg08322194 | 0.016015429  | 0.538222542 |
| UNC5A cg08494545 | -0.003673939 | 0.291967392 |
| UNC5A cg09582314 | 0.00751391   | 0.684918522 |
| UNC5A cg09901106 | -0.001297936 | 0.883612122 |
| UNC5A cg11130778 | 0.001601113  | 0.725560558 |
| UNC5A cg11139090 | 0.017385161  | 0.395735221 |
| UNC5A cg11491504 | -0.003025803 | 0.708024455 |
| UNC5A cg11918743 | 0.038175624  | 0.151838617 |
| UNC5A cg12888080 | 0.006620476  | 0.777311483 |
| UNC5A cg12893143 | -0.005169271 | 0.255665017 |
| UNC5A cg13665261 | -0.007499754 | 0.89378305  |
| UNC5A cg13928709 | -0.006575117 | 0.227201654 |
| UNC5A cg14871923 | -0.000843298 | 0.769706841 |

|                  |              |             |
|------------------|--------------|-------------|
| UNC5A cg14968378 | 0.000274428  | 0.980279233 |
| UNC5A cg15366301 | 0.118745819  | 0.000180941 |
| UNC5A cg16268165 | 0.035876471  | 0.396356107 |
| UNC5A cg16413715 | 0.019931258  | 0.439712744 |
| UNC5A cg16457351 | -0.031138426 | 0.387796215 |
| UNC5A cg16635016 | -0.004594155 | 0.878710855 |
| UNC5A cg17449197 | 0.118299398  | 1.1167E-06  |
| UNC5A cg18422123 | -0.001806088 | 0.698420767 |
| UNC5A cg18585314 | 0.066164052  | 0.001485237 |
| UNC5A cg19091621 | -0.002710309 | 0.903540117 |
| UNC5A cg19742888 | -0.01719562  | 0.402746175 |
| UNC5A cg22338352 | -0.005455965 | 0.344869905 |
| UNC5A cg22957659 | -0.046818269 | 0.048985094 |
| UNC5A cg23292965 | -0.062582336 | 0.056490421 |
| UNC5A cg23929295 | -0.000249792 | 0.963379078 |
| UNC5A cg24575624 | 0.048237497  | 0.059241835 |
| UNC5A cg24600724 | -0.070617223 | 0.002190741 |
| UNC5A cg24886356 | -0.051831504 | 0.182061774 |
| UNC5A cg25389791 | 0.012330235  | 0.204107259 |
| UNC5A cg25429640 | 0.108889214  | 0.000158696 |
| UNC5A cg25439951 | 0.002514633  | 0.885188887 |
| UNC5A cg25667000 | -0.041090054 | 0.002362208 |
| UNC5B cg02378006 | -0.109907632 | 1.49115E-07 |
| UNC5B cg02440719 | 0.020547069  | 0.015148925 |
| UNC5B cg04177244 | -0.049610299 | 1.35799E-09 |
| UNC5B cg04269057 | -0.050789002 | 0.095304388 |
| UNC5B cg05871136 | -0.004896491 | 0.483893959 |
| UNC5B cg08342721 | -0.001896888 | 0.800492486 |
| UNC5B cg08905239 | -0.043097199 | 3.67194E-05 |
| UNC5B cg09470230 | 9.85344E-05  | 0.98962919  |
| UNC5B cg12873350 | -0.005732747 | 0.834309265 |
| UNC5B cg14042687 | -0.004326534 | 0.179807661 |
| UNC5B cg14957186 | 0.027661099  | 0.25753325  |
| UNC5B cg15929693 | 0.000794879  | 0.946583268 |
| UNC5B cg16759416 | -0.072636818 | 0.002077492 |
| UNC5B cg17477835 | -0.005041783 | 0.826960813 |
| UNC5B cg17668756 | -0.133287954 | 4.3632E-12  |
| UNC5B cg18317005 | -0.099897895 | 1.05684E-12 |
| UNC5B cg18389931 | 0.009062819  | 0.635990948 |
| UNC5B cg18858343 | -0.001217485 | 0.791214734 |
| UNC5B cg19673155 | 0.033938859  | 0.098661842 |
| UNC5B cg20254483 | -0.004316144 | 0.198427277 |
| UNC5B cg23622162 | 0.08671878   | 7.62201E-05 |
| UNC5B cg23967873 | -0.002644854 | 0.786330725 |
| UNC5B cg24591279 | -0.033685518 | 0.00634024  |
| UNC5B cg26152017 | 0.02891285   | 0.443944126 |

|                   |              |             |
|-------------------|--------------|-------------|
| UNC5B cg26450586  | -0.001105355 | 0.878394705 |
| UNC5C cg00329039  | -0.001125642 | 0.771942639 |
| UNC5C cg01194057  | 0.000404899  | 0.948104346 |
| UNC5C cg01462668  | -0.081218319 | 1.12971E-08 |
| UNC5C cg01788994  | 1.15654E-05  | 0.999539164 |
| UNC5C cg02931225  | -0.078360859 | 0.018850169 |
| UNC5C cg03008707  | -0.027465931 | 0.02266337  |
| UNC5C cg03024478  | -0.020060519 | 0.383952375 |
| UNC5C cg04281738  | -0.068099759 | 0.005425496 |
| UNC5C cg05121379  | -0.041678441 | 0.004622536 |
| UNC5C cg07234102  | -0.001526201 | 0.715325507 |
| UNC5C cg07824265  | -0.012242899 | 0.099359565 |
| UNC5C cg09100013  | -0.000566775 | 0.93889565  |
| UNC5C cg10520887  | 0.001326674  | 0.862274314 |
| UNC5C cg10528218  | -0.083740192 | 2.36848E-07 |
| UNC5C cg11723848  | -0.000252461 | 0.977130515 |
| UNC5C cg12412390  | -0.005593698 | 0.144289544 |
| UNC5C cg12553181  | -0.01020426  | 0.619569029 |
| UNC5C cg12584684  | -0.001490055 | 0.712797901 |
| UNC5C cg12802900  | -0.000797007 | 0.92118704  |
| UNC5C cg13265789  | -0.000981681 | 0.830021307 |
| UNC5C cg14101976  | -0.027547697 | 0.524195491 |
| UNC5C cg15701178  | 0.002492509  | 0.42633505  |
| UNC5C cg15984718  | -0.004533261 | 0.53794356  |
| UNC5C cg17031751  | -0.007608073 | 0.158829332 |
| UNC5C cg17334018  | -0.001577248 | 0.771691846 |
| UNC5C cg17337917  | 0.015883229  | 0.783776494 |
| UNC5C cg17504765  | -0.010636746 | 0.54081106  |
| UNC5C cg21574186  | -0.026784886 | 0.423342141 |
| UNC5C cg21782409  | -0.002308527 | 0.48125643  |
| UNC5C cg22490991  | -0.013148121 | 0.842508099 |
| UNC5C cg22634891  | 0.00284054   | 0.368008721 |
| UNC5C cg23542495  | -0.004304496 | 0.54300481  |
| UNC5C cg24870497  | -0.001008719 | 0.925113747 |
| UNC5CL cg00592058 | 0.003643109  | 0.811208391 |
| UNC5CL cg03068376 | 0.010820337  | 0.287726956 |
| UNC5CL cg04650094 | 0.025321696  | 0.329774972 |
| UNC5CL cg05673137 | -0.049667103 | 0.065108749 |
| UNC5CL cg09489757 | -0.021543866 | 0.303778792 |
| UNC5CL cg09712135 | 0.019520537  | 0.273720252 |
| UNC5CL cg14418226 | 0.01325785   | 0.665093321 |
| UNC5CL cg14769373 | -0.035728483 | 0.184846895 |
| UNC5CL cg15849648 | -0.013439662 | 0.400543312 |
| UNC5CL cg17826424 | -0.006780925 | 0.641011446 |
| UNC5CL cg19175193 | -0.010099019 | 0.679811644 |
| UNC5CL cg21128951 | 0.038008454  | 0.136118974 |

|                   |              |             |
|-------------------|--------------|-------------|
| UNC5CL cg21961970 | -0.082513765 | 0.02153247  |
| UNC5CL cg22346765 | 0.023240291  | 0.45676344  |
| UNC5CL cg24419528 | -0.000811351 | 0.966984271 |
| UNC5D cg00297600  | -0.03300368  | 0.498870162 |
| UNC5D cg00948124  | -0.067766969 | 0.07199363  |
| UNC5D cg01311313  | -0.06803204  | 0.09452835  |
| UNC5D cg02355183  | -0.027532914 | 0.40327991  |
| UNC5D cg03752965  | -0.039212309 | 0.330552702 |
| UNC5D cg03995061  | -0.020908547 | 0.051864433 |
| UNC5D cg04402007  | -0.019587539 | 0.143817081 |
| UNC5D cg07396194  | -0.067745809 | 0.034731609 |
| UNC5D cg07574158  | -0.069516783 | 0.01899353  |
| UNC5D cg08000065  | -0.014607759 | 0.42139937  |
| UNC5D cg08300924  | -0.008641555 | 0.821839049 |
| UNC5D cg08701686  | -0.143124622 | 9.57268E-08 |
| UNC5D cg08754088  | -0.022278703 | 0.716276551 |
| UNC5D cg10393548  | -0.018285712 | 0.693723323 |
| UNC5D cg10861722  | -0.040031648 | 0.095223035 |
| UNC5D cg11093149  | -0.011790371 | 0.587383299 |
| UNC5D cg13561879  | -0.055458197 | 0.188073354 |
| UNC5D cg15981092  | -0.011181274 | 0.14411237  |
| UNC5D cg16137995  | -0.002502902 | 0.710022195 |
| UNC5D cg17486097  | -0.00797117  | 0.528467805 |
| UNC5D cg18583697  | -0.047631749 | 0.063739484 |
| UNC5D cg18760194  | -0.040588579 | 0.059516728 |
| UNC5D cg19003975  | -0.045754689 | 0.224765601 |
| UNC5D cg19403244  | -0.028013455 | 0.135718799 |
| UNC5D cg20776920  | -0.000874834 | 0.877421421 |
| UNC5D cg21320573  | -0.076326652 | 0.034206934 |
| UNC5D cg22386073  | -0.060308427 | 0.022212243 |
| UNC5D cg22507558  | -0.059527961 | 0.133839647 |
| UNC5D cg22872195  | -0.116449613 | 0.009019717 |
| UNC5D cg23222401  | 0.043924024  | 0.099087615 |
| UNC5D cg23279503  | -0.015410634 | 0.792450838 |
| UNC5D cg26679047  | -0.021692853 | 0.690054891 |
| UNC5D cg26764980  | 0.045489672  | 0.201139294 |
| UNC5D cg26872137  | -0.006536264 | 0.789242461 |
| UNC5D cg27244980  | -0.159618899 | 5.02356E-05 |
| DCC cg00027400    | -0.023112383 | 0.004957508 |
| DCC cg00399483    | -0.049214229 | 0.022506377 |
| DCC cg01839464    | -0.014686498 | 0.531123094 |
| DCC cg02835371    | -0.095933164 | 0.000334221 |
| DCC cg02837027    | -0.045527573 | 0.21054508  |
| DCC cg03458463    | -0.16038942  | 2.95766E-06 |
| DCC cg04272086    | -0.037289137 | 0.014261297 |
| DCC cg05420896    | -0.035272823 | 0.004859807 |

|                    |              |             |
|--------------------|--------------|-------------|
| DCC cg06261937     | -0.026723904 | 0.055989861 |
| DCC cg06784848     | -0.082724601 | 0.005633997 |
| DCC cg07897248     | -0.020109275 | 0.286278269 |
| DCC cg07935012     | -0.017185342 | 0.077786532 |
| DCC cg14222939     | -0.050828134 | 0.000801518 |
| DCC cg14268020     | -0.110281923 | 0.000351    |
| DCC cg14743291     | -0.008897415 | 0.425332329 |
| DCC cg16080643     | -0.148388568 | 3.94233E-08 |
| DCC cg16964748     | -0.086824028 | 0.0024234   |
| DCC cg18801691     | -0.013260412 | 0.438162751 |
| DCC cg18841634     | -0.023872109 | 0.111293966 |
| DCC cg18866015     | -0.014046481 | 0.575186323 |
| DCC cg18874136     | -0.008904603 | 0.492541362 |
| DCC cg19042459     | -0.017835553 | 0.26956655  |
| DCC cg19613722     | -0.016991497 | 0.300232864 |
| DCC cg19995964     | 0.008557213  | 0.332125651 |
| DCC cg20917891     | -0.028097399 | 0.053274621 |
| DCC cg21263710     | -0.048149354 | 0.21498732  |
| DCC cg21381065     | -0.040409808 | 0.026618793 |
| DCC cg21623566     | -0.015800086 | 0.448620972 |
| DCC cg21669679     | -0.013319599 | 0.421483451 |
| DCC cg23242898     | -0.007489266 | 0.586584806 |
| DCC cg24084891     | -0.006857663 | 0.815671857 |
| DCC cg24270629     | -0.135326822 | 2.71242E-08 |
| DCC cg25122395     | -0.038967422 | 0.045588904 |
| DCC cg25204852     | -0.054082877 | 0.221567329 |
| DCC cg25266232     | -0.019485661 | 0.027045667 |
| DCC cg25602457     | -0.022506637 | 0.179908701 |
| DCC cg25818763     | 0.02481603   | 0.560395166 |
| NEUROG1 cg00513205 | 0.097645824  | 1.37678E-11 |
| NEUROG1 cg02604503 | 0.068383477  | 0.003694839 |
| NEUROG1 cg04063589 | -0.002412863 | 0.960643182 |
| NEUROG1 cg04469059 | -0.01550726  | 0.816428997 |
| NEUROG1 cg04620091 | -0.004328456 | 0.880317158 |
| NEUROG1 cg04897683 | 0.03321446   | 0.456995626 |
| NEUROG1 cg07035503 | -0.011263121 | 0.857567531 |
| NEUROG1 cg08285915 | -7.29521E-05 | 0.999172791 |
| NEUROG1 cg08451582 | 0.078158912  | 0.003221698 |
| NEUROG1 cg08587845 | -0.045539999 | 0.204974297 |
| NEUROG1 cg11144641 | 0.016607387  | 0.615375184 |
| NEUROG1 cg11248413 | -0.013787307 | 0.628582872 |
| NEUROG1 cg11260904 | 0.026952911  | 0.543497425 |
| NEUROG1 cg11946503 | -0.045255487 | 0.275496724 |
| NEUROG1 cg12065579 | -0.014338696 | 0.756311278 |
| NEUROG1 cg13336665 | 0.022661764  | 0.385566583 |
| NEUROG1 cg14747563 | -0.010438719 | 0.862373419 |

|                    |              |             |
|--------------------|--------------|-------------|
| NEUROG1 cg14958635 | 0.081695138  | 0.009653663 |
| NEUROG1 cg17772342 | 0.003478003  | 0.891165147 |
| NEUROG1 cg17830308 | -0.031539316 | 0.606582137 |
| NEUROG1 cg18362330 | 0.067134056  | 2.47814E-05 |
| NEUROG1 cg19951663 | -0.010072803 | 0.657516221 |
| NEUROG1 cg22630755 | -0.002130736 | 0.958486231 |
| NEUROG1 cg22734397 | -0.010083689 | 0.845355546 |
| NEUROG1 cg24899138 | 0.063481951  | 3.47062E-07 |
| NEUROG1 cg25640822 | -0.001332108 | 0.965538853 |
| NEUROG2 cg02182354 | 0.000198004  | 0.991730784 |
| NEUROG2 cg06367702 | -0.016954551 | 0.717315882 |
| NEUROG2 cg07131451 | -0.000159515 | 0.994387906 |
| NEUROG2 cg07964553 | 0.047329264  | 0.239905446 |
| NEUROG2 cg07997294 | -0.005316058 | 0.484558808 |
| NEUROG2 cg08929548 | -0.000673976 | 0.989973016 |
| NEUROG2 cg09707262 | 0.002489214  | 0.937592044 |
| NEUROG2 cg10511618 | 0.026677602  | 0.498584205 |
| NEUROG2 cg10871779 | -0.005891235 | 0.374760964 |
| NEUROG2 cg15463803 | -0.01163713  | 0.801092305 |
| NEUROG2 cg17031795 | -0.001275158 | 0.982957274 |
| NEUROG2 cg17267256 | -0.005472446 | 0.628289573 |
| NEUROG2 cg26708817 | 0.000586618  | 0.931708061 |
| NEUROG3 cg02262662 | -0.011031281 | 0.589709787 |
| NEUROG3 cg03425110 | -0.037949466 | 0.197630672 |
| NEUROG3 cg05886671 | 0.004568658  | 0.901081195 |
| NEUROG3 cg06043042 | -0.010562585 | 0.617475263 |
| NEUROG3 cg06973667 | -0.025473089 | 0.543671744 |
| NEUROG3 cg07647353 | -0.004776538 | 0.876569433 |
| NEUROG3 cg09154558 | 0.004067249  | 0.856972142 |
| NEUROG3 cg10001282 | -0.00749964  | 0.78518205  |
| NEUROG3 cg12164232 | -0.003660572 | 0.913071989 |
| NEUROG3 cg12938159 | -0.026920295 | 0.535567377 |
| NEUROG3 cg17583413 | 0.006508174  | 0.892053155 |
| NEUROG3 cg18834338 | -0.008798746 | 0.803201128 |
| NEUROG3 cg26333837 | 0.031531598  | 0.276892842 |
| NLGN1 cg00493429   | 0.028199767  | 0.000648457 |
| NLGN1 cg01946530   | -0.002317371 | 0.76262634  |
| NLGN1 cg02521771   | -0.047956239 | 0.062819411 |
| NLGN1 cg03729941   | -0.017330491 | 0.418789876 |
| NLGN1 cg04812049   | 0.000749608  | 0.88756375  |
| NLGN1 cg05058204   | -0.012657931 | 0.478410836 |
| NLGN1 cg05543049   | -0.004524598 | 0.291825395 |
| NLGN1 cg05722552   | -0.003373462 | 0.400931434 |
| NLGN1 cg06097077   | -0.109670854 | 7.85213E-12 |
| NLGN1 cg06304401   | -0.002215037 | 0.6226084   |
| NLGN1 cg07452098   | 0.035906666  | 0.010811903 |



|                  |              |             |
|------------------|--------------|-------------|
| NLGN1 cg07489890 | -0.002774081 | 0.289027178 |
| NLGN1 cg09229620 | -0.033134904 | 1.34937E-06 |
| NLGN1 cg10623221 | -0.040669824 | 0.214309068 |
| NLGN1 cg11733675 | -0.000103911 | 0.995214913 |
| NLGN1 cg13238990 | -0.003548308 | 0.458243068 |
| NLGN1 cg13582793 | -0.005875035 | 0.117222546 |
| NLGN1 cg14559455 | -0.014206697 | 0.711881413 |
| NLGN1 cg14890220 | -0.000454954 | 0.995072544 |
| NLGN1 cg15225201 | -0.004823628 | 0.052097789 |
| NLGN1 cg15558616 | -0.090793979 | 0.002003397 |
| NLGN1 cg17482360 | 0.016617082  | 0.343276524 |
| NLGN1 cg19245371 | -0.005532647 | 0.076338805 |
| NLGN1 cg19510409 | 0.006175172  | 0.597344833 |
| NLGN1 cg21120436 | -0.0288929   | 9.8689E-06  |
| NLGN1 cg21459053 | -0.005200433 | 0.09995229  |
| NLGN1 cg21548131 | -0.136087384 | 0.000198604 |
| NLGN1 cg21904441 | 0.010367183  | 0.099474302 |
| NLGN1 cg21946824 | -0.038312723 | 0.001795852 |
| NLGN1 cg22960621 | 0.01214614   | 0.827544035 |
| NLGN1 cg23642200 | -0.0012599   | 0.659628561 |
| NLGN1 cg24600895 | 0.000758806  | 0.874293562 |
| NLGN1 cg27315556 | -0.005551015 | 0.115907553 |
| NLGN2 cg00061695 | 0.065819737  | 4.62884E-07 |
| NLGN2 cg03169180 | -0.15445738  | 5.7851E-08  |
| NLGN2 cg03403688 | -0.004669563 | 0.627782831 |
| NLGN2 cg03461559 | -0.007437015 | 0.623400062 |
| NLGN2 cg04235625 | -0.077758765 | 0.003594283 |
| NLGN2 cg07379741 | -0.063420449 | 2.41268E-05 |
| NLGN2 cg08870143 | -0.03108294  | 0.069007255 |
| NLGN2 cg09568217 | 0.055555329  | 0.000110235 |
| NLGN2 cg09711113 | 0.02019706   | 0.023295041 |
| NLGN2 cg10092265 | 0.084670984  | 3.42954E-05 |
| NLGN2 cg10369169 | -0.005341003 | 0.668911387 |
| NLGN2 cg13177052 | -0.037397563 | 0.259720532 |
| NLGN2 cg15660077 | -0.008455357 | 0.872993048 |
| NLGN2 cg16950726 | -0.037510932 | 0.159712753 |
| NLGN2 cg18089810 | -0.019986742 | 0.257699133 |
| NLGN2 cg20718319 | 0.046004441  | 0.015990396 |
| NLGN2 cg22659681 | -0.009378625 | 0.481462638 |
| NLGN2 cg25617307 | -0.019834324 | 0.000317645 |
| NRXN1 cg00345522 | -0.076998922 | 0.013244587 |
| NRXN1 cg01014190 | -0.231116393 | 1.3528E-08  |
| NRXN1 cg02495518 | -0.018700617 | 0.743425141 |
| NRXN1 cg03168108 | -0.005285834 | 0.400187033 |
| NRXN1 cg03295083 | 0.052136224  | 0.13377821  |
| NRXN1 cg03531247 | 0.114461242  | 1.08749E-08 |

|                  |              |             |
|------------------|--------------|-------------|
| NRXN1 cg03714495 | -0.010665866 | 0.306863714 |
| NRXN1 cg04595505 | 0.088429969  | 0.000252312 |
| NRXN1 cg04707706 | -0.005751747 | 0.916514781 |
| NRXN1 cg05015185 | 0.051776917  | 0.082150112 |
| NRXN1 cg05495351 | -0.013224797 | 0.032645542 |
| NRXN1 cg06466689 | 0.0034697    | 0.445063799 |
| NRXN1 cg06609051 | 0.007443191  | 0.83127653  |
| NRXN1 cg06707406 | -0.186775888 | 5.30485E-08 |
| NRXN1 cg06749295 | -0.120802444 | 2.2904E-05  |
| NRXN1 cg07083023 | 0.006810453  | 0.346776443 |
| NRXN1 cg07529754 | 0.009803051  | 0.849194149 |
| NRXN1 cg07781364 | -0.032452367 | 0.2442507   |
| NRXN1 cg08008931 | -0.001694793 | 0.747781104 |
| NRXN1 cg08189280 | 0.01903249   | 0.019304181 |
| NRXN1 cg08425543 | 0.045352292  | 8.56418E-07 |
| NRXN1 cg09044294 | 0.02644071   | 0.090279962 |
| NRXN1 cg09271709 | 0.014700264  | 0.78877299  |
| NRXN1 cg09351848 | 0.021318291  | 0.280760317 |
| NRXN1 cg10099415 | 0.052381899  | 0.126038486 |
| NRXN1 cg10756457 | -0.189956354 | 6.60031E-12 |
| NRXN1 cg10917619 | -0.06807527  | 0.026704023 |
| NRXN1 cg10919889 | 0.026688258  | 0.237915904 |
| NRXN1 cg11430766 | 0.000691061  | 0.958767674 |
| NRXN1 cg11775579 | 0.002740271  | 0.913763396 |
| NRXN1 cg12001457 | 0.018292903  | 0.550835363 |
| NRXN1 cg12167526 | -0.035307373 | 0.335376767 |
| NRXN1 cg12446209 | -0.192843709 | 7.17106E-09 |
| NRXN1 cg12884814 | -0.029067593 | 0.127973937 |
| NRXN1 cg13204432 | 0.001564141  | 0.958516768 |
| NRXN1 cg13594075 | -0.05090141  | 0.005298569 |
| NRXN1 cg13906811 | -0.013201999 | 0.796323445 |
| NRXN1 cg13999106 | -0.025678798 | 0.002017023 |
| NRXN1 cg14329860 | -0.086373314 | 0.000395276 |
| NRXN1 cg14875171 | 0.085439558  | 0.061509109 |
| NRXN1 cg15558448 | 0.000359183  | 0.98444765  |
| NRXN1 cg15573998 | -0.092834174 | 6.07251E-07 |
| NRXN1 cg15912010 | -0.043640118 | 0.037016553 |
| NRXN1 cg16852792 | -0.007349014 | 0.617524076 |
| NRXN1 cg17526573 | 0.067353125  | 0.138419085 |
| NRXN1 cg18201351 | 0.034782193  | 0.304765082 |
| NRXN1 cg18396357 | -0.058516547 | 0.000139474 |
| NRXN1 cg18773591 | -0.054289066 | 0.013616628 |
| NRXN1 cg19824059 | 0.005767088  | 0.51373754  |
| NRXN1 cg20062057 | -0.050985704 | 2.19827E-05 |
| NRXN1 cg20536469 | -0.049696391 | 6.28673E-05 |
| NRXN1 cg21203781 | -0.248964524 | 9.40741E-11 |

|                  |              |             |
|------------------|--------------|-------------|
| NRXN1 cg22001533 | 0.045520909  | 0.195294683 |
| NRXN1 cg22324022 | -0.003246461 | 0.664276316 |
| NRXN1 cg22573528 | -0.201568395 | 9.95704E-10 |
| NRXN1 cg23273041 | 0.008558647  | 0.161077683 |
| NRXN1 cg23601521 | 0.029153095  | 0.07041941  |
| NRXN1 cg23851515 | -0.129642029 | 3.54583E-10 |
| NRXN1 cg24402935 | 0.001798038  | 0.740871271 |
| NRXN1 cg25036261 | 0.01063642   | 0.007021381 |
| NRXN1 cg25278175 | -0.080070868 | 2.37835E-05 |
| NRXN1 cg25565504 | -0.01330631  | 0.748727148 |
| NRXN1 cg25717438 | -0.013935843 | 0.006152317 |
| NRXN1 cg26881899 | -0.01019502  | 0.381629854 |
| NRXN1 cg27112565 | -0.004810706 | 0.055405415 |
| NRXN1 cg27456111 | -0.082678555 | 3.91435E-06 |
| NRXN2 cg00599252 | -0.003780936 | 0.24149516  |
| NRXN2 cg00668337 | -0.012613607 | 0.738775621 |
| NRXN2 cg01579950 | 0.078487243  | 3.12933E-05 |
| NRXN2 cg02961807 | -0.021825965 | 0.00077307  |
| NRXN2 cg03035661 | -0.002296883 | 0.7495305   |
| NRXN2 cg03263716 | 0.014713105  | 0.149872119 |
| NRXN2 cg03586390 | -0.080651353 | 0.012590667 |
| NRXN2 cg03982537 | -0.034832121 | 0.099246271 |
| NRXN2 cg04686778 | -0.000667387 | 0.967526293 |
| NRXN2 cg05267623 | -0.000306114 | 0.933103364 |
| NRXN2 cg06055392 | -0.098513258 | 4.51E-12    |
| NRXN2 cg07256668 | 0.00667845   | 0.450206286 |
| NRXN2 cg07712329 | -0.002369182 | 0.62011162  |
| NRXN2 cg07733098 | -0.056342656 | 0.022313403 |
| NRXN2 cg08011645 | -0.116728736 | 5.6009E-07  |
| NRXN2 cg08623810 | 0.030119495  | 0.377230608 |
| NRXN2 cg08800856 | -0.152188629 | 2.61118E-06 |
| NRXN2 cg09072148 | -0.167900333 | 2.94274E-06 |
| NRXN2 cg09129050 | -0.049439741 | 0.162225834 |
| NRXN2 cg09526022 | -0.000528881 | 0.943970278 |
| NRXN2 cg09948336 | -0.005312713 | 0.813553098 |
| NRXN2 cg10571796 | 0.022465402  | 0.283662607 |
| NRXN2 cg10885956 | -0.012106678 | 0.35011087  |
| NRXN2 cg10905012 | -0.024237276 | 0.01541842  |
| NRXN2 cg10940462 | -0.086607071 | 0.078861217 |
| NRXN2 cg12129012 | -0.1211074   | 5.24343E-08 |
| NRXN2 cg12403546 | 0.000359525  | 0.965899004 |
| NRXN2 cg12840818 | -0.065163418 | 5.35056E-09 |
| NRXN2 cg12938128 | -0.133503096 | 5.87947E-05 |
| NRXN2 cg13015284 | -0.042291503 | 0.000175189 |
| NRXN2 cg14053234 | 0.011289205  | 0.297099895 |
| NRXN2 cg15939287 | -0.168426272 | 6.34474E-06 |

|                  |              |             |
|------------------|--------------|-------------|
| NRXN2 cg16527223 | -0.000725041 | 0.891093339 |
| NRXN2 cg16718678 | -0.000497366 | 0.922979234 |
| NRXN2 cg16958106 | -0.007686339 | 0.404570963 |
| NRXN2 cg17059853 | -0.010775813 | 0.000795746 |
| NRXN2 cg17219981 | 0.000388721  | 0.946617206 |
| NRXN2 cg17221226 | -0.134593713 | 1.52836E-06 |
| NRXN2 cg17236169 | 0.094825808  | 3.20557E-07 |
| NRXN2 cg17491228 | -0.067397454 | 0.012641361 |
| NRXN2 cg18431183 | -0.008281302 | 0.77561974  |
| NRXN2 cg19131476 | -0.089508557 | 1.15649E-08 |
| NRXN2 cg19395706 | -0.022035086 | 0.323466551 |
| NRXN2 cg19691659 | -0.070757415 | 0.002342268 |
| NRXN2 cg20234205 | -0.088334026 | 0.000345919 |
| NRXN2 cg20718855 | -0.05118383  | 0.10349919  |
| NRXN2 cg21533897 | 0.004759923  | 0.889079549 |
| NRXN2 cg21660452 | -0.003309268 | 0.653154036 |
| NRXN2 cg21751231 | -0.000930962 | 0.817098067 |
| NRXN2 cg21996761 | -0.111232923 | 0.000750119 |
| NRXN2 cg22159835 | -0.053944126 | 0.086551167 |
| NRXN2 cg22187354 | 0.1548803    | 9.05119E-09 |
| NRXN2 cg22797270 | 0.064027832  | 0.0361492   |
| NRXN2 cg23182880 | -0.101825739 | 5.38117E-07 |
| NRXN2 cg23201340 | -0.00944919  | 0.65987091  |
| NRXN2 cg23389215 | -0.067953455 | 4.97365E-07 |
| NRXN2 cg23907108 | -0.106053451 | 8.38198E-06 |
| NRXN2 cg24007388 | 0.013401087  | 0.684704189 |
| NRXN2 cg24331824 | 0.013209123  | 0.376704946 |
| NRXN2 cg24407327 | -0.011072321 | 0.045752458 |
| NRXN2 cg24524285 | -0.07378132  | 0.002083501 |
| NRXN2 cg25073093 | 0.000918814  | 0.968067387 |
| NRXN2 cg25104637 | -0.121539894 | 7.16467E-09 |
| NRXN2 cg25321556 | -0.047911889 | 0.024931773 |
| NRXN2 cg26112489 | -0.028735524 | 0.193240474 |
| NRXN2 cg26388730 | -0.111355864 | 8.31997E-05 |
| NRXN2 cg26661640 | -0.055145067 | 0.021698564 |
| NRXN2 cg26732720 | 0.005880075  | 0.894867617 |
| NRXN2 cg26805405 | -0.003832411 | 0.442550119 |
| NRXN2 cg27017482 | 0.076878602  | 0.003575007 |
| NRXN2 cg27122888 | 0.109978875  | 3.96198E-11 |
| NRXN2 cg27209729 | -0.084601708 | 1.61015E-07 |
| NRXN2 cg27243166 | 0.010469906  | 0.655461773 |
| NRXN2 cg27319263 | -0.062116274 | 0.001988697 |
| NRXN2 cg27466845 | -0.014732173 | 0.611117423 |
| NRXN3 cg00685573 | -0.029842043 | 0.400040983 |
| NRXN3 cg02030212 | -0.048186476 | 0.017016969 |
| NRXN3 cg02111786 | 0.000164515  | 0.988558802 |

|                  |              |             |
|------------------|--------------|-------------|
| NRXN3 cg02326285 | -0.007503481 | 0.662909883 |
| NRXN3 cg02971654 | -0.005928766 | 0.652235219 |
| NRXN3 cg04272011 | 0.032801793  | 0.194411866 |
| NRXN3 cg04324727 | -0.003181602 | 0.665193736 |
| NRXN3 cg04549090 | -0.002082381 | 0.655854521 |
| NRXN3 cg04897790 | -0.017779393 | 0.645194559 |
| NRXN3 cg05175318 | 0.081314501  | 0.001164367 |
| NRXN3 cg05280527 | 0.011834144  | 0.784078938 |
| NRXN3 cg05850716 | 0.013319074  | 0.362652957 |
| NRXN3 cg07001909 | 0.00034379   | 0.963063998 |
| NRXN3 cg07147443 | 0.000112119  | 0.995885653 |
| NRXN3 cg07177395 | -0.00551162  | 0.912972478 |
| NRXN3 cg07182163 | 0.094221533  | 0.006999947 |
| NRXN3 cg07231787 | -0.001419845 | 0.904676641 |
| NRXN3 cg08186935 | -0.063232331 | 0.006088399 |
| NRXN3 cg09209257 | 0.049398482  | 0.10286734  |
| NRXN3 cg09340276 | -0.004493541 | 0.949908998 |
| NRXN3 cg09950309 | -0.005687979 | 0.806011028 |
| NRXN3 cg09971881 | -0.019682707 | 0.766562908 |
| NRXN3 cg10015904 | -0.057622408 | 0.16599625  |
| NRXN3 cg10186254 | -0.10747234  | 0.000943635 |
| NRXN3 cg10737847 | -0.000362923 | 0.990285835 |
| NRXN3 cg10991579 | 0.048524668  | 0.17413331  |
| NRXN3 cg12101264 | -0.051380972 | 0.091039522 |
| NRXN3 cg12779438 | 0.000551039  | 0.97761696  |
| NRXN3 cg13101330 | 0.034822903  | 0.309337613 |
| NRXN3 cg13564020 | -0.093644295 | 0.009745058 |
| NRXN3 cg13680118 | -0.018683523 | 0.287928743 |
| NRXN3 cg13833923 | 0.060501715  | 0.049289724 |
| NRXN3 cg14317273 | -0.007013796 | 0.814056293 |
| NRXN3 cg14335579 | 0.003075522  | 0.668812061 |
| NRXN3 cg14527639 | -0.021677299 | 0.659639871 |
| NRXN3 cg15320277 | 0.004095732  | 0.953474678 |
| NRXN3 cg15434778 | -0.070546016 | 0.029157432 |
| NRXN3 cg15572745 | 0.049739023  | 0.303496397 |
| NRXN3 cg16372520 | 0.080758822  | 0.001957202 |
| NRXN3 cg16420308 | -0.066731249 | 0.013596777 |
| NRXN3 cg16766249 | -0.001195241 | 0.954539854 |
| NRXN3 cg18199664 | 0.027293874  | 0.327325237 |
| NRXN3 cg18311665 | -0.041405863 | 0.374571339 |
| NRXN3 cg18422058 | 0.026097407  | 0.575175343 |
| NRXN3 cg18459339 | -0.008147111 | 0.893488819 |
| NRXN3 cg18597220 | 0.04182567   | 0.014392394 |
| NRXN3 cg18818949 | -0.016816823 | 0.78781748  |
| NRXN3 cg19662611 | -0.015813812 | 0.676224066 |
| NRXN3 cg19753609 | -0.098768067 | 0.004017397 |

|                  |              |             |
|------------------|--------------|-------------|
| NRXN3 cg20076659 | -0.054283587 | 3.02016E-07 |
| NRXN3 cg20312971 | 0.087981039  | 0.007767085 |
| NRXN3 cg21010031 | 0.002493962  | 0.929030583 |
| NRXN3 cg21061859 | -0.059744016 | 0.056590564 |
| NRXN3 cg21113554 | 0.0531426    | 0.007229184 |
| NRXN3 cg21918126 | 0.001093819  | 0.883853257 |
| NRXN3 cg22828707 | -0.008770295 | 0.896016468 |
| NRXN3 cg22878414 | 0.028871583  | 0.133542628 |
| NRXN3 cg22892860 | 0.009380972  | 0.525966059 |
| NRXN3 cg22908679 | 0.015533593  | 0.35839617  |
| NRXN3 cg23949782 | 0.052686111  | 0.124242879 |
| NRXN3 cg24020215 | 0.079809449  | 0.04488768  |
| NRXN3 cg24197470 | -0.003549642 | 0.693975129 |
| NRXN3 cg25564511 | -0.024672647 | 0.067314097 |
| EFN2B cg00241273 | -0.084633733 | 0.011724131 |
| EFN2B cg02441149 | -0.001682171 | 0.928691925 |
| EFN2B cg03929741 | -0.000242116 | 0.981081656 |
| EFN2B cg04321866 | 0.00797203   | 0.282306342 |
| EFN2B cg05040544 | 0.000656304  | 0.915637252 |
| EFN2B cg05493945 | 0.01033766   | 0.471400783 |
| EFN2B cg05876564 | -0.078543536 | 0.064472108 |
| EFN2B cg06193439 | -0.001841815 | 0.74800332  |
| EFN2B cg06784108 | -0.004998344 | 0.787900845 |
| EFN2B cg06826155 | 0.056394152  | 0.070665119 |
| EFN2B cg11173146 | -0.002081738 | 0.825659813 |
| EFN2B cg11196529 | -0.028121827 | 0.620687015 |
| EFN2B cg11220502 | 0.040529637  | 0.108591132 |
| EFN2B cg12053155 | 0.00545394   | 0.650983134 |
| EFN2B cg12674145 | -0.001842116 | 0.9138715   |
| EFN2B cg13179469 | 0.000881702  | 0.947367493 |
| EFN2B cg14363981 | 0.009851043  | 0.397797952 |
| EFN2B cg17011964 | -0.11731264  | 0.002506895 |
| EFN2B cg17906168 | -0.093648467 | 5.07315E-07 |
| EFN2B cg18158859 | -0.051306079 | 0.308344274 |
| EFN2B cg18771357 | -0.000730228 | 0.961269374 |
| EFN2B cg19938857 | 0.002066543  | 0.7769531   |
| EFN2B cg20256153 | 0.033549064  | 0.002093283 |
| EFN2B cg22114393 | -0.00086411  | 0.942357692 |
| EFN2B cg22179913 | 0.023524928  | 0.548464598 |
| EFN2B cg24929737 | -0.003133427 | 0.84260429  |
| EFN2B cg25634175 | -0.063312142 | 2.13094E-08 |
| EFN2B cg25814649 | -0.031777306 | 0.463465974 |
| EFN2B cg26138978 | -0.002862178 | 0.967604645 |
| EFN2B cg26273417 | 0.091390186  | 2.8027E-06  |
| EFN2B cg27017630 | -0.021898491 | 0.112680531 |
| EFN2B cg27226949 | 6.45625E-06  | 0.999707344 |



**Neuronal signaling signature referring to Fig. 2a, modified from Venkatarama**

| <b>Gene with CpG site</b> | <b>FDC in high-neural glioblastoma</b> | <b>p-value</b> |
|---------------------------|----------------------------------------|----------------|
| GAP43 cg00216361          | 0.002160208                            | 0.417707642    |
| GAP43 cg01710607          | -0.259086427                           | 1.76834E-18    |
| GAP43 cg03430502          | -0.009590992                           | 0.007127563    |
| GAP43 cg05773207          | -0.01098219                            | 0.614582823    |
| GAP43 cg05963821          | 0.005584014                            | 0.23062102     |
| GAP43 cg07863831          | 0.029287413                            | 0.06143482     |
| GAP43 cg10960118          | -0.019828047                           | 0.386205879    |
| GAP43 cg11077657          | -0.001389792                           | 0.825182332    |
| GAP43 cg11153239          | -0.011915498                           | 0.076421082    |
| GAP43 cg12146703          | -0.006456773                           | 0.525109428    |
| GAP43 cg13592373          | -0.049917774                           | 0.018175919    |
| GAP43 cg14203525          | 0.001706367                            | 0.558073643    |
| GAP43 cg15143702          | -0.088740817                           | 1.91198E-06    |
| GAP43 cg18849015          | 0.002829013                            | 0.39649807     |
| GAP43 cg19676835          | 0.000641705                            | 0.878091622    |
| GAP43 cg19836595          | -0.027471916                           | 0.003589394    |
| GAP43 cg20914508          | -0.007898534                           | 0.001834675    |
| GAP43 cg26783404          | -0.043914503                           | 0.244925411    |
| GAP43 cg27608911          | -0.011095859                           | 0.024189657    |
| GJA1 cg01493740           | -0.002781633                           | 0.788341899    |
| GJA1 cg03181829           | 0.003895811                            | 0.472272492    |
| GJA1 cg10446179           | 0.000185843                            | 0.966074645    |
| GJA1 cg11486295           | -0.136116895                           | 3.54198E-15    |
| GJA1 cg11590170           | -0.009367987                           | 0.292757126    |
| GJA1 cg17160382           | 0.010539754                            | 0.226109728    |
| GJA1 cg17498101           | 3.23386E-06                            | 0.999590775    |
| GJA1 cg23699648           | 0.104176837                            | 4.81048E-05    |
| GJA1 cg24375465           | -0.120116432                           | 1.3509E-13     |
| GRIA1 cg07633435          | -0.151758428                           | 4.01658E-09    |
| GRIA1 cg08578734          | -0.012793132                           | 0.014838173    |
| GRIA1 cg13583454          | -0.17212038                            | 4.95064E-09    |
| GRIA1 cg16281600          | -0.094676934                           | 0.001431868    |
| GRIA1 cg17020834          | 0.004054481                            | 0.461276502    |
| GRIA1 cg17987968          | -0.064820218                           | 0.006686229    |
| GRIA1 cg20668321          | -0.21041883                            | 3.03028E-10    |
| GRIA1 cg21146273          | -0.095785641                           | 0.000423115    |
| GRIA1 cg22798121          | -0.053159219                           | 0.011738232    |
| GRIA1 cg23165500          | -0.13170471                            | 2.3583E-10     |
| GRIA1 cg26343183          | 0.022290145                            | 0.269770752    |
| GRIA2 cg00463631          | 0.001405683                            | 0.828101379    |
| GRIA2 cg00699993          | -0.001384049                           | 0.57469655     |
| GRIA2 cg01041222          | -0.008841612                           | 0.006360613    |
| GRIA2 cg01942962          | -0.008917619                           | 0.053016709    |



|                  |              |             |
|------------------|--------------|-------------|
| GRIA2 cg02757172 | -0.071557833 | 4.70302E-07 |
| GRIA2 cg08475096 | -0.005409615 | 0.085695886 |
| GRIA2 cg15425280 | -0.009837536 | 0.006492941 |
| GRIA2 cg16777106 | -0.013403004 | 0.261409014 |
| GRIA2 cg17605476 | -0.014862348 | 6.90655E-05 |
| GRIA2 cg22597733 | -0.006590266 | 0.011513929 |
| GRIA2 cg23734973 | -0.012372876 | 0.001697911 |
| GRIA2 cg24452260 | -0.002297749 | 0.521065782 |
| GRIA2 cg25148589 | -0.01830372  | 0.00010535  |
| GRIA2 cg26739975 | -0.020256668 | 0.012204558 |
| GRIA4 cg00343633 | -0.002352325 | 0.684459277 |
| GRIA4 cg00629688 | -0.0937245   | 2.45131E-05 |
| GRIA4 cg01111718 | -0.119509724 | 1.58697E-14 |
| GRIA4 cg03225817 | 0.004126215  | 0.488704456 |
| GRIA4 cg03243226 | -0.004974943 | 0.473359946 |
| GRIA4 cg04747226 | -0.001599855 | 0.899659663 |
| GRIA4 cg05082609 | -0.021759707 | 0.064248237 |
| GRIA4 cg05087008 | -0.211463343 | 1.51082E-07 |
| GRIA4 cg06119894 | -0.018249474 | 0.200818972 |
| GRIA4 cg07592190 | 0.033934743  | 0.29570422  |
| GRIA4 cg07972135 | 0.013899631  | 0.361949347 |
| GRIA4 cg09147777 | -0.007133644 | 0.249093769 |
| GRIA4 cg09742895 | -0.19149728  | 2.45253E-14 |
| GRIA4 cg09974063 | -0.011929026 | 0.10687749  |
| GRIA4 cg09980522 | -0.004992785 | 0.384030068 |
| GRIA4 cg11067712 | -0.002815147 | 0.382570623 |
| GRIA4 cg11308643 | -0.00767191  | 0.445576857 |
| GRIA4 cg12754421 | -0.005015184 | 0.509728282 |
| GRIA4 cg15603568 | -0.004181706 | 0.285962218 |
| GRIA4 cg19343464 | -0.003377691 | 0.769035573 |
| GRIA4 cg20073686 | -0.0060069   | 0.251650195 |
| GRIA4 cg20306837 | 0.003256994  | 0.481766719 |
| GRIA4 cg21217024 | 0.001057915  | 0.771112503 |
| GRIA4 cg21719418 | -0.129692321 | 1.00223E-13 |
| GRIA4 cg23559689 | -0.003973512 | 0.508051668 |
| GRIA4 cg23676682 | -0.000229298 | 0.976190919 |
| GRIA4 cg27368776 | -0.037478356 | 0.000659595 |
| GRM1 cg03478199  | -0.121679084 | 0.000887107 |
| GRM1 cg06015218  | -0.057134276 | 0.019000821 |
| GRM1 cg06121352  | -0.184765793 | 2.07636E-08 |
| GRM1 cg06254938  | -0.217607604 | 1.37771E-11 |
| GRM1 cg07218663  | -0.027242124 | 0.061077624 |
| GRM1 cg07224114  | -0.142635326 | 3.43176E-08 |
| GRM1 cg08076125  | -0.062918683 | 0.024447264 |
| GRM1 cg08875948  | 0.008868627  | 0.85528093  |
| GRM1 cg08958294  | -0.053514313 | 0.02384755  |
| GRM1 cg09179079  | -0.031444941 | 0.014106782 |
| GRM1 cg09423283  | 0.037860475  | 0.215595718 |
| GRM1 cg09558195  | -0.008417009 | 0.76906891  |

|                 |              |             |
|-----------------|--------------|-------------|
| GRM1 cg10904109 | -0.022821841 | 0.467103532 |
| GRM1 cg13371951 | -0.014161888 | 0.574100923 |
| GRM1 cg13722123 | -0.05130698  | 0.096482728 |
| GRM1 cg13830799 | -0.093750158 | 0.001944983 |
| GRM1 cg14526297 | -0.008219781 | 0.06816601  |
| GRM1 cg16671069 | -0.027376948 | 0.438544892 |
| GRM1 cg17199007 | -0.007485839 | 0.480124381 |
| GRM1 cg19512268 | -0.054850035 | 0.21656771  |
| GRM1 cg19645248 | -0.106893656 | 3.48577E-07 |
| GRM1 cg21714266 | 0.073943351  | 0.046560464 |
| GRM1 cg21725954 | -0.019729909 | 0.428221839 |
| GRM1 cg23696752 | -0.023340768 | 0.452933871 |
| GRM1 cg23753795 | -0.168583236 | 7.03444E-14 |
| GRM1 cg24266105 | -0.058586578 | 0.003651697 |
| GRM1 cg26256158 | -0.004118379 | 0.759532618 |
| GRM1 cg26875958 | -0.117295166 | 4.55709E-10 |
| GRM1 cg27642554 | -0.033790759 | 0.287321565 |
| GRM4 cg00070899 | -0.118098163 | 3.12903E-07 |
| GRM4 cg00143321 | -0.00633863  | 0.208879882 |
| GRM4 cg00369202 | -0.16217027  | 5.7929E-10  |
| GRM4 cg00898486 | -0.118200949 | 2.25395E-07 |
| GRM4 cg01081636 | -0.132087187 | 1.80159E-08 |
| GRM4 cg01090161 | -0.210520059 | 1.92792E-15 |
| GRM4 cg01140008 | -0.161726202 | 1.34775E-07 |
| GRM4 cg01242196 | -0.173967626 | 1.15895E-12 |
| GRM4 cg03412431 | -0.011425121 | 0.012750455 |
| GRM4 cg03723730 | -0.075831598 | 0.002229662 |
| GRM4 cg05745748 | -0.008634077 | 0.03918362  |
| GRM4 cg05800983 | -0.039413413 | 0.111397352 |
| GRM4 cg06068039 | -0.151636963 | 7.05257E-09 |
| GRM4 cg06112910 | -0.070932595 | 5.01954E-07 |
| GRM4 cg06456864 | -0.052981669 | 0.004276194 |
| GRM4 cg06898306 | -0.211703673 | 3.93473E-25 |
| GRM4 cg07699277 | -0.007706223 | 0.482721422 |
| GRM4 cg07735790 | -0.009643776 | 0.682756735 |
| GRM4 cg08289346 | -0.011814591 | 0.754502321 |
| GRM4 cg08969344 | -0.227157136 | 1.01331E-14 |
| GRM4 cg09106984 | -0.162103538 | 7.89916E-11 |
| GRM4 cg09657185 | -0.044656299 | 0.028468246 |
| GRM4 cg10083824 | -0.029477764 | 0.492006313 |
| GRM4 cg10270430 | -0.049455938 | 0.066257004 |
| GRM4 cg12008034 | -0.092009319 | 8.91575E-05 |
| GRM4 cg12013817 | -0.025836377 | 0.060882077 |
| GRM4 cg13344206 | -0.11935417  | 3.11754E-07 |
| GRM4 cg15884992 | -0.060371029 | 0.005282731 |
| GRM4 cg16739976 | -0.084994484 | 9.05653E-06 |
| GRM4 cg16916688 | -0.099716587 | 0.000731875 |
| GRM4 cg17107112 | -0.062546309 | 8.19045E-07 |
| GRM4 cg17450585 | -0.091376308 | 9.94215E-06 |

|                   |              |             |
|-------------------|--------------|-------------|
| GRM4 cg17762073   | -0.058288459 | 0.00715518  |
| GRM4 cg18403569   | -0.043991037 | 0.01229403  |
| GRM4 cg19471040   | -0.069545066 | 0.031796964 |
| GRM4 cg19999705   | -0.009057552 | 0.754502321 |
| GRM4 cg20151098   | -0.025514198 | 0.00019797  |
| GRM4 cg20490197   | -0.087226066 | 9.44947E-06 |
| GRM4 cg20772037   | -0.170046947 | 1.16218E-08 |
| GRM4 cg21599324   | -0.100452044 | 1.59934E-08 |
| GRM4 cg21797718   | -0.050486447 | 0.038787205 |
| GRM4 cg22188571   | -0.151749201 | 1.90229E-11 |
| GRM4 cg22484822   | -0.071253561 | 2.9759E-07  |
| GRM4 cg22827707   | -0.01758895  | 0.005094544 |
| GRM4 cg22971402   | -0.207748277 | 4.67487E-13 |
| GRM4 cg23321702   | -0.180907785 | 2.47283E-12 |
| GRM4 cg24082276   | -0.011329932 | 0.729246104 |
| GRM4 cg24469001   | -0.198038965 | 2.96051E-15 |
| GRM4 cg25988118   | -0.015631512 | 0.627741446 |
| GRM4 cg26424956   | 0.01407155   | 0.643236817 |
| GRM4 cg27371466   | -0.141039569 | 1.17477E-07 |
| KCNN4 cg01424145  | -0.031757952 | 0.015804254 |
| KCNN4 cg01447572  | -0.072850167 | 2.11212E-05 |
| KCNN4 cg03731131  | -0.054455535 | 0.049867038 |
| KCNN4 cg04833845  | -0.109605522 | 6.98316E-17 |
| KCNN4 cg07756483  | -0.008627508 | 0.048077996 |
| KCNN4 cg10767665  | -0.112232543 | 1.12951E-06 |
| KCNN4 cg11624345  | -0.10165581  | 0.000341148 |
| KCNN4 cg14066757  | -0.016462869 | 0.313611476 |
| KCNN4 cg15977816  | -0.027447837 | 0.041976459 |
| KCNN4 cg18506018  | -0.051023331 | 9.18501E-10 |
| KCNN4 cg22904711  | -0.08217768  | 0.000454803 |
| KCNN4 cg26504422  | -0.062946856 | 0.008961287 |
| KCNN4 cg26890181  | -0.028732752 | 0.020270245 |
| KCNN4 cg26960896  | -0.044758018 | 0.005541364 |
| CTNND1 cg03813899 | -0.010923239 | 0.523485939 |
| CTNND1 cg06291428 | 0.012275871  | 0.322770902 |
| CTNND1 cg09878888 | -0.004167905 | 0.326563053 |
| CTNND1 cg10831212 | -0.002134478 | 0.688275465 |
| CTNND1 cg11643991 | -0.001485791 | 0.816420098 |
| CTNND1 cg15068709 | -0.099493969 | 2.49249E-06 |
| CTNND1 cg16127573 | -0.025102992 | 0.063253955 |
| CTNND1 cg17345994 | -0.204587885 | 1.15348E-15 |
| CTNND1 cg18213545 | -0.003998748 | 0.258781416 |
| CTNND1 cg19210276 | -0.005319634 | 0.332730467 |
| CTNND1 cg19752551 | -0.241684588 | 1.02152E-24 |
| CTNND1 cg21272996 | -0.002802617 | 0.584318545 |
| THBS1 cg00027995  | -0.213633043 | 1.23684E-11 |
| THBS1 cg00836101  | -0.082997055 | 0.00060386  |
| THBS1 cg01637789  | -0.047419731 | 0.003568321 |
| THBS1 cg02291532  | -0.175312769 | 5.6754E-11  |

|                  |              |             |
|------------------|--------------|-------------|
| THBS1 cg03196766 | -0.132790048 | 4.52718E-06 |
| THBS1 cg04051458 | -0.005073449 | 0.554463337 |
| THBS1 cg04827020 | -0.205978433 | 7.8537E-21  |
| THBS1 cg04888085 | -0.015581265 | 0.148183749 |
| THBS1 cg05886626 | -0.00959143  | 0.739924766 |
| THBS1 cg07276078 | 0.006147256  | 0.304048184 |
| THBS1 cg08433504 | -0.070448863 | 1.30291E-05 |
| THBS1 cg09291834 | 0.00335148   | 0.730416233 |
| THBS1 cg10078511 | -0.067185095 | 9.20509E-05 |
| THBS1 cg10548034 | 0.00387376   | 0.238037029 |
| THBS1 cg10576133 | -0.024452004 | 2.62162E-07 |
| THBS1 cg12154418 | -0.009461984 | 0.685870799 |
| THBS1 cg12484072 | 0.001791023  | 0.656492    |
| THBS1 cg13360562 | -0.015728004 | 0.013045136 |
| THBS1 cg13375187 | -0.003454561 | 0.501233706 |
| THBS1 cg13458407 | 0.00263783   | 0.883836151 |
| THBS1 cg13463208 | 0.00281893   | 0.425642611 |
| THBS1 cg14182667 | -0.005987735 | 0.562747134 |
| THBS1 cg14519850 | 0.007871194  | 0.517833352 |
| THBS1 cg15161296 | -0.013611524 | 0.042812336 |
| THBS1 cg18234606 | -0.129141163 | 2.11616E-06 |
| THBS1 cg19570574 | -0.02100468  | 0.073911634 |
| THBS1 cg20043291 | -0.005914958 | 0.596228526 |
| THBS1 cg22580173 | 0.001134327  | 0.92283739  |
| THBS1 cg23116540 | -0.07817895  | 4.74352E-05 |
| THBS1 cg23849826 | -0.060244052 | 3.92179E-05 |
| THBS1 cg25499543 | -0.06310661  | 0.000316254 |
| THBS1 cg25503381 | -0.064681873 | 0.000148956 |
| TTYH1 cg00558215 | 0.007562264  | 0.400484219 |
| TTYH1 cg00813890 | -0.008846858 | 0.183821647 |
| TTYH1 cg02623991 | -0.008447467 | 0.011277057 |
| TTYH1 cg09474331 | -0.00220203  | 0.727980426 |
| TTYH1 cg10187559 | -0.093855503 | 3.75816E-07 |
| TTYH1 cg14814062 | -0.043593604 | 0.001347461 |
| TTYH1 cg15241920 | 0.005157608  | 0.414888588 |
| TTYH1 cg15723536 | 0.016533162  | 0.024801481 |
| TTYH1 cg15972301 | -0.053519476 | 2.191E-05   |
| TTYH1 cg20230372 | 0.004694511  | 0.612912157 |
| TTYH1 cg20439295 | -0.025157403 | 0.005169251 |
| TTYH1 cg21287054 | -0.027860128 | 0.100732522 |
| TTYH1 cg21883754 | 0.000953189  | 0.78972954  |
| TTYH1 cg22206370 | -0.178235848 | 2.61253E-11 |
| TTYH1 cg23695687 | 0.006548428  | 0.204270571 |
| TTYH1 cg24687102 | -0.033955528 | 0.162678037 |
| HSPA5 cg01733783 | -0.009615123 | 0.002511237 |
| HSPA5 cg10997785 | -0.058735772 | 0.000177855 |
| HSPA5 cg13769004 | -0.002944927 | 0.387728485 |
| HSPA5 cg14294444 | 0.001083647  | 0.762010418 |
| BDNF cg00298481  | -0.0007783   | 0.802263288 |

|                 |              |             |
|-----------------|--------------|-------------|
| BDNF cg01225698 | -0.023347552 | 0.448425841 |
| BDNF cg01583131 | -0.079801494 | 0.008541296 |
| BDNF cg01636003 | -0.003393157 | 0.221916389 |
| BDNF cg01642653 | -0.025851388 | 0.399412129 |
| BDNF cg02527472 | -0.047100336 | 0.084941884 |
| BDNF cg02613510 | -0.097499624 | 0.001345417 |
| BDNF cg03167496 | -0.014494131 | 0.611164738 |
| BDNF cg03747251 | -0.00753236  | 0.551905897 |
| BDNF cg03984780 | -0.006151117 | 0.03051808  |
| BDNF cg04106006 | -0.007001098 | 0.889372737 |
| BDNF cg04481212 | -0.000298809 | 0.940072086 |
| BDNF cg04672351 | -0.001709511 | 0.43782095  |
| BDNF cg05189570 | -0.080699697 | 5.77462E-11 |
| BDNF cg05218375 | -0.008521356 | 0.082481117 |
| BDNF cg05733135 | -0.019445033 | 0.198732768 |
| BDNF cg05818894 | -0.007180117 | 0.459315357 |
| BDNF cg06025631 | -0.000704742 | 0.916576785 |
| BDNF cg06046431 | -0.04642876  | 0.03986164  |
| BDNF cg06260077 | 0.007391204  | 0.430701617 |
| BDNF cg06684850 | -0.033224297 | 0.39039252  |
| BDNF cg06816235 | 0.013211781  | 0.715547632 |
| BDNF cg06979684 | -0.040136789 | 0.037093702 |
| BDNF cg06991510 | 0.001064034  | 0.789988073 |
| BDNF cg07159484 | 0.002003335  | 0.755096665 |
| BDNF cg07238832 | -0.031708665 | 0.008002832 |
| BDNF cg07704699 | -0.047229239 | 0.010274325 |
| BDNF cg08362738 | -0.002255605 | 0.301859987 |
| BDNF cg08388004 | -0.013726092 | 0.002801484 |
| BDNF cg09492354 | -0.001637935 | 0.557909819 |
| BDNF cg09606766 | -0.001801528 | 0.652840898 |
| BDNF cg10022526 | 0.012125721  | 0.690414601 |
| BDNF cg10558494 | -0.00138992  | 0.869721934 |
| BDNF cg10635145 | -0.092842502 | 0.003139264 |
| BDNF cg11241206 | -0.002083372 | 0.70576212  |
| BDNF cg11718030 | -0.047474508 | 0.194747456 |
| BDNF cg11806762 | -0.095742595 | 0.000178751 |
| BDNF cg12448003 | -0.003826584 | 0.883161786 |
| BDNF cg13974632 | -0.014283198 | 0.417133464 |
| BDNF cg14291693 | -0.124649778 | 8.55091E-11 |
| BDNF cg14589148 | -0.007091829 | 0.73582704  |
| BDNF cg15014679 | -0.226345125 | 6.04431E-17 |
| BDNF cg15313332 | 0.008342035  | 0.573090265 |
| BDNF cg15462887 | -0.01401125  | 0.69601459  |
| BDNF cg15688670 | -0.0013428   | 0.682980226 |
| BDNF cg15710245 | -0.008415424 | 0.09905654  |
| BDNF cg15914769 | -0.001028228 | 0.690688888 |
| BDNF cg16257091 | -0.028366608 | 0.335709814 |
| BDNF cg17413943 | -0.010572907 | 0.055150561 |
| BDNF cg18117895 | 0.001227892  | 0.818499274 |

|                 |              |             |
|-----------------|--------------|-------------|
| BDNF cg18354203 | -0.337982457 | 2.08378E-37 |
| BDNF cg18595174 | -0.024211822 | 0.330418904 |
| BDNF cg20108357 | -0.134330426 | 1.42622E-09 |
| BDNF cg20340655 | 0.00156736   | 0.791941417 |
| BDNF cg20954537 | 0.001005304  | 0.839469537 |
| BDNF cg21010859 | 0.002277795  | 0.690442567 |
| BDNF cg22043168 | -0.033808445 | 0.059226322 |
| BDNF cg23426002 | -0.041353623 | 4.88695E-05 |
| BDNF cg23497217 | -0.000477465 | 0.910411408 |
| BDNF cg23619332 | -0.004768524 | 0.073343066 |
| BDNF cg23947039 | -0.001943328 | 0.763526094 |
| BDNF cg24065044 | -0.001722651 | 0.863695235 |
| BDNF cg24249411 | -0.046882007 | 0.130008164 |
| BDNF cg24377657 | -0.003725759 | 0.792044842 |
| BDNF cg24650785 | -0.016358801 | 0.564339899 |
| BDNF cg25328597 | -0.002149288 | 0.45371341  |
| BDNF cg25381667 | 0.011413583  | 0.541908531 |
| BDNF cg25412831 | -0.014942703 | 0.746147456 |
| BDNF cg25457956 | 0.01839504   | 0.361120777 |
| BDNF cg25962210 | -0.011269341 | 0.002128921 |
| BDNF cg26057780 | 0.005913223  | 0.674635567 |
| BDNF cg26840770 | -0.003402862 | 0.314825821 |
| BDNF cg26949694 | 0.017042802  | 0.62237618  |
| BDNF cg27193031 | -0.004134262 | 0.400462748 |
| BDNF cg27351358 | -0.088072122 | 0.000961796 |









| <b>Patient-derived xenograft data referring to Fig. 3e</b> |                         |                               |                        |
|------------------------------------------------------------|-------------------------|-------------------------------|------------------------|
| <b>PDX line</b>                                            | <b>Idat-file tissue</b> | <b>Neural signature score</b> | <b>Neural subgroup</b> |
| GS-8                                                       | 204894630041_R08C01     | 0.388                         | Low                    |
| GS-10                                                      | 204894630081_R04C01     | 0.385                         | Low                    |
| GS-73                                                      | 203282450110_R03C01     | 0.335                         | Low                    |
| GS-57                                                      | 203282450014_R05C01     | 0.569                         | High                   |
| GS-74                                                      | 205735130138_R05C01     | 0.528                         | High                   |
| GS-75                                                      | 206466470159_R03C01     | 0.415                         | High                   |
| GS-101                                                     | 203939360028_R02C01     | 0.474                         | High                   |

| <b>Year of surgery</b> | <b>Patients age at surgery</b> | <b>Sex</b> |
|------------------------|--------------------------------|------------|
| 2006                   | 67                             | female     |
| 2005                   | 63                             | female     |
| 2016                   | 66                             | male       |
| 2014                   | 59                             | male       |
| 2016                   | 73                             | male       |
| 2016                   | 73                             | male       |
| 2019                   | 77                             | female     |
